# Supplementary material for: The synthesis of some novel stilbene dimers incorporating diamide tethers: studies in single electron transfer oxidation (FeCl3)
Source: Royal Society of Chemistry journal article supplement (doi:10.1039/c7ra12534h), 2018-01-01
Supplement: c7ra12534h1.pdf [file c7ra12534h1.pdf]

1 **he synthesis of some novel stilbene dimers incorporating diamide tethers: studies in single**  
2 **electron transfer oxidation (FeCl<sub>3</sub>)**

3  
4 **Maryam Sadat Alehashem\*<sup>a</sup>, Azhar Bin Ariffin\*<sup>a</sup>, Amjad Ayad Qatran Al-Khdhairawi<sup>b</sup> and Noel**  
5 **F Thomas<sup>a\*</sup>**

6  
7 *<sup>a</sup>Department of Chemistry, Faculty of Science , University of Malaya, 50603 Kuala Lumpur, Malaysia*

8 *<sup>b</sup>Atta-ur-Rahman Institute for Natural Product Discovery and Faculty of Pharmacy, Universiti Teknologi MARA*  
9 *Selangor Branch, 42300 Puncak Alam, Selangor, Malaysia*

10  
11 \*Corresponding authors: Maryam Sadat Alehashem, Email: maryam.alehashem@yahoo.com

12 Azhar Bin Ariffin , Email: azhar70@um.edu.my

13 Noel Francis Thomas, Email: noelfthomas@um.edu.my & noelfthomas@yahoo.com

14

15

16

17

18

19

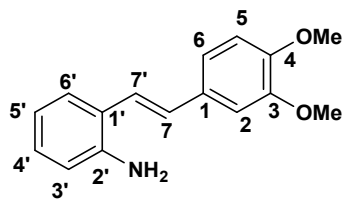

1

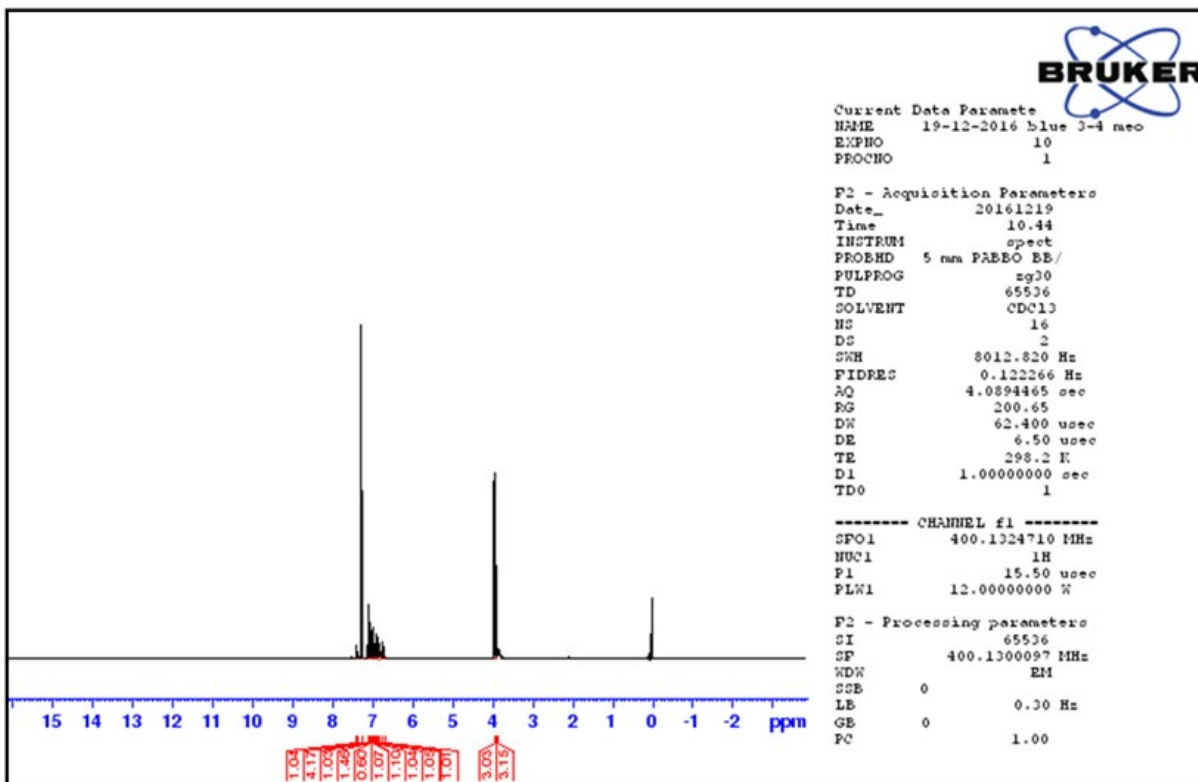

Figure S1: <sup>1</sup>H NMR (CDCl<sub>3</sub>, 400MHz) spectrum of compound (E)-2-(3,4-dimethoxystyryl)aniline.

2

3

4

5

6

7

8

9

10

11

12

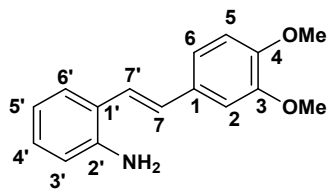

1

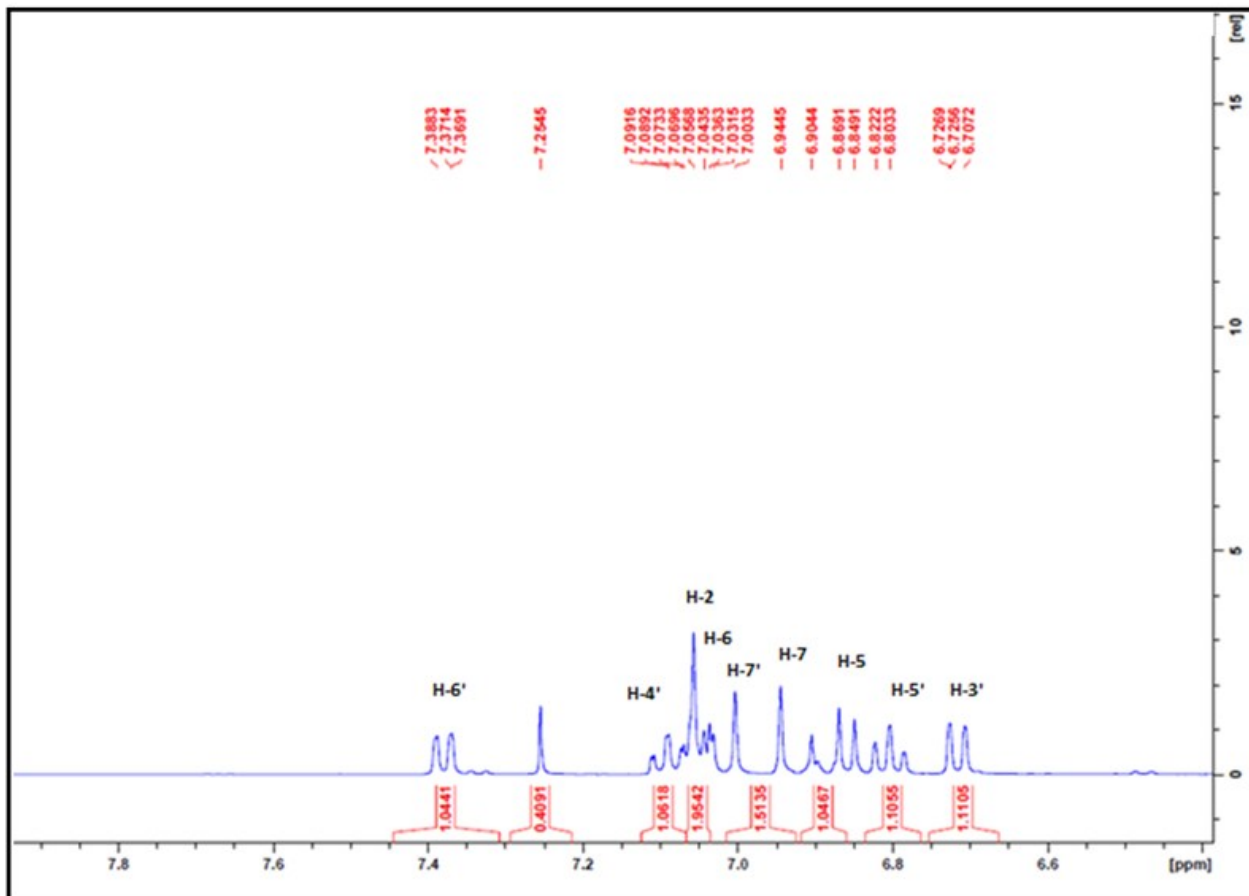

Figure S2: <sup>1</sup>H NMR (CDCl<sub>3</sub>, 400MHz) spectrum of compound (E)-2-(3,4-dimethoxystyryl)aniline (EXPANSION).

2  
3  
4  
5  
6  
7  
8  
9

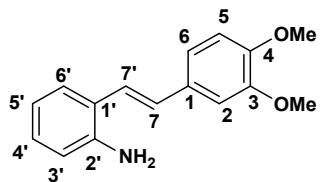

1

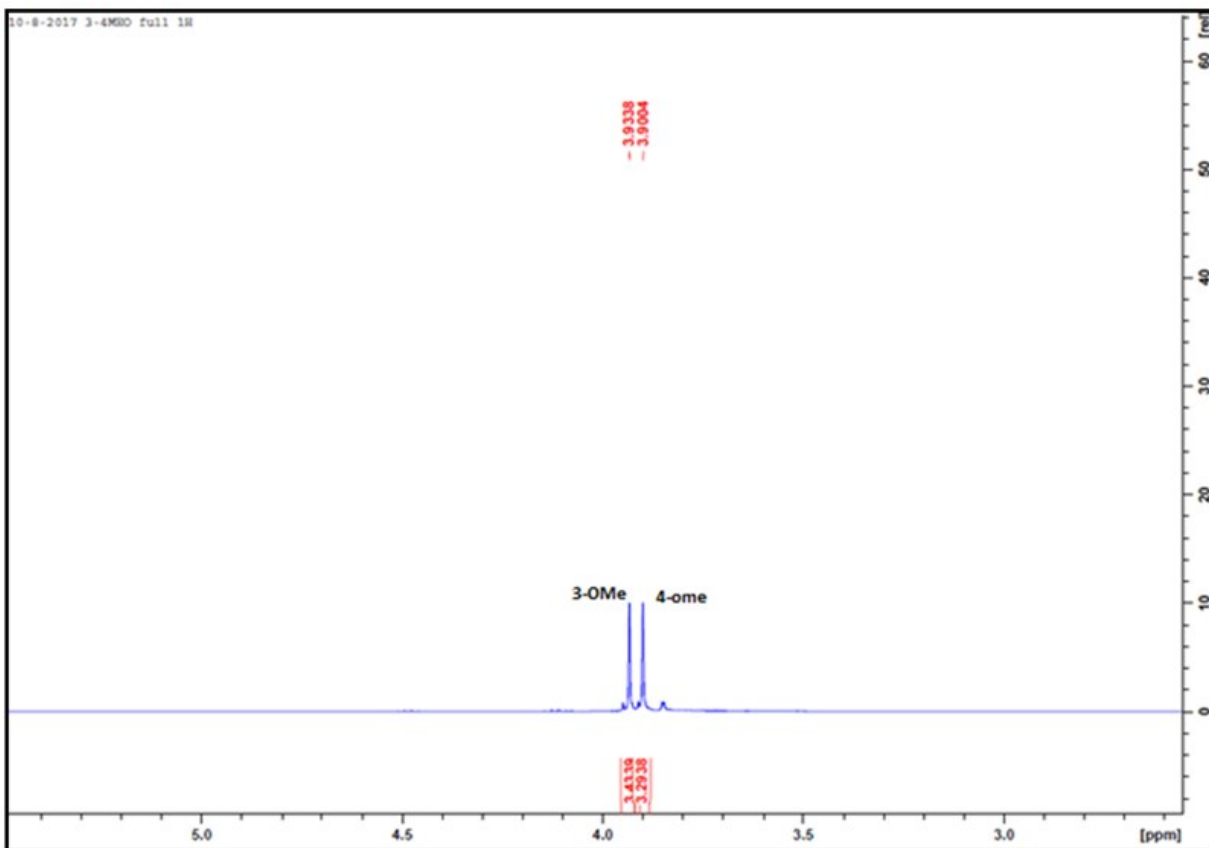

2

3

Figure S3:  $^1\text{H}$  NMR ( $\text{CDCl}_3$ , 400MHz) spectrum of compound (E)-2-(3,4-dimethoxystyryl)aniline (EXPANSION).

4

5

6

7

8

9

10

11

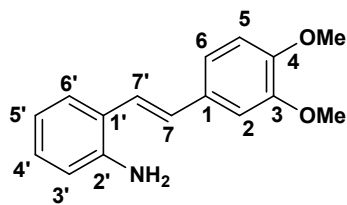

1

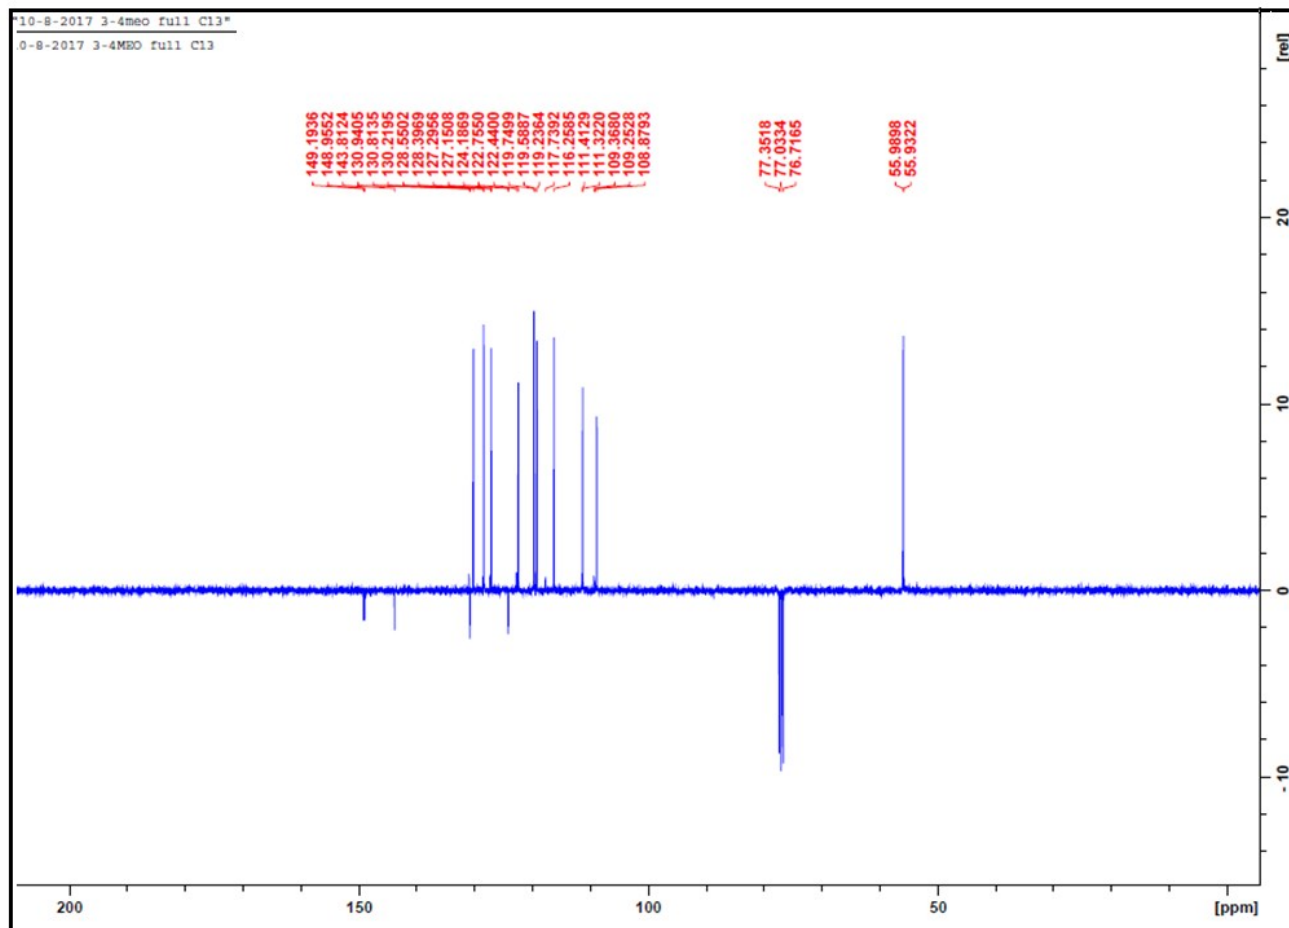

Figure S4:  $^{13}\text{C}$  DEPT135,  $\text{CH}_3/\text{CH}$  po  $\{^1\text{H}\}$  ( $\text{CDCl}_3$ , 400MHz) spectrum of compound (E)-2-(3,4-dimethoxystyryl)aniline.

2  
3  
4  
5  
6  
7  
8  
9  
10

1

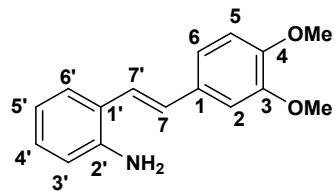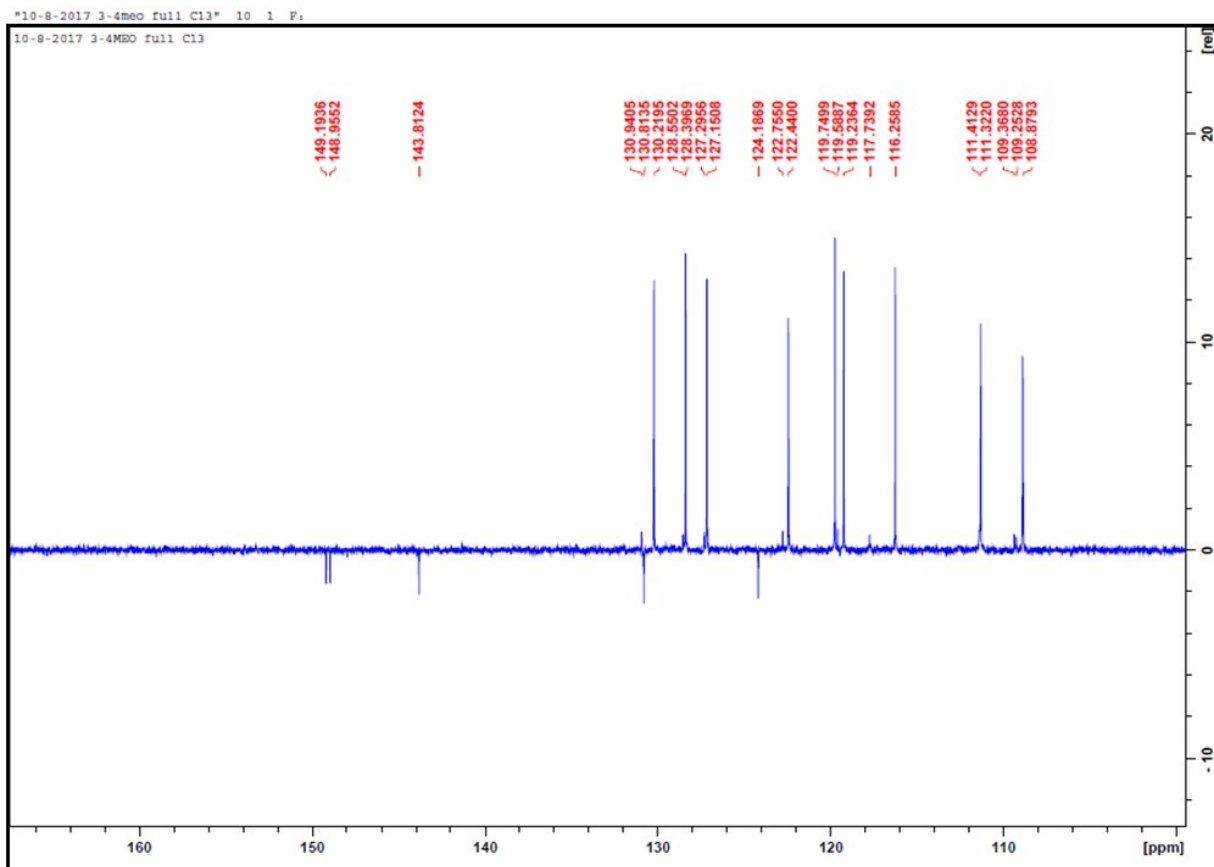

2

3

Figure S5:  $^{13}\text{C}$  DEPT135,  $\text{CH}_3/\text{CH}$  po  $\{^1\text{H}\}$  ( $\text{CDCl}_3$ , 400MHz) spectrum of compound (E)-2-(3,4-dimethoxystyryl)aniline (EXPANSION).

4

5

6

7

8

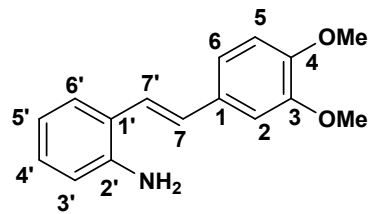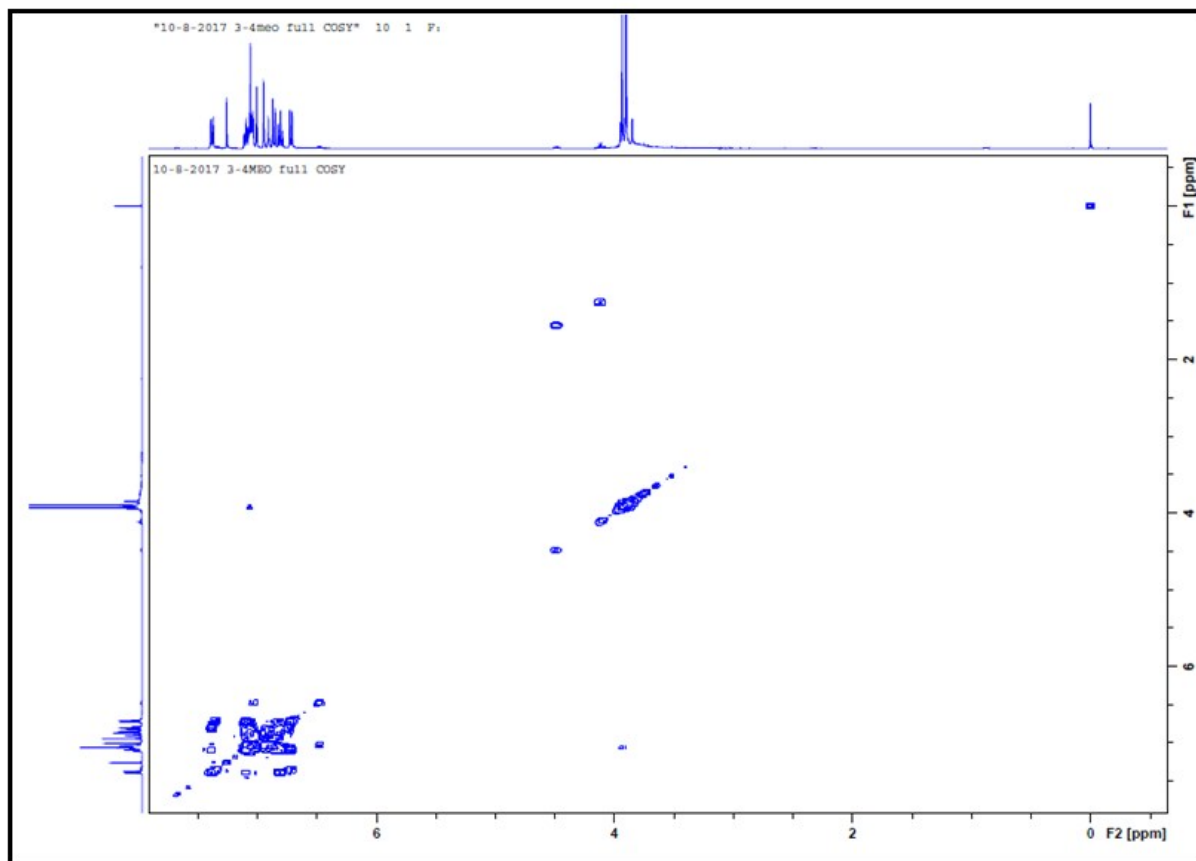

Figure S6: C COSY GPSW  $\{^1\text{H}\}$ ( $\text{CDCl}_3$ , 400MHz) spectrum of compound (E)-2-(3,4-dimethoxystyryl)aniline.

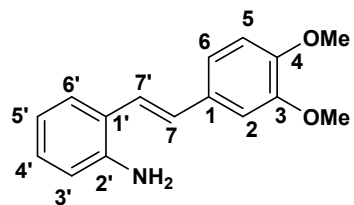

1

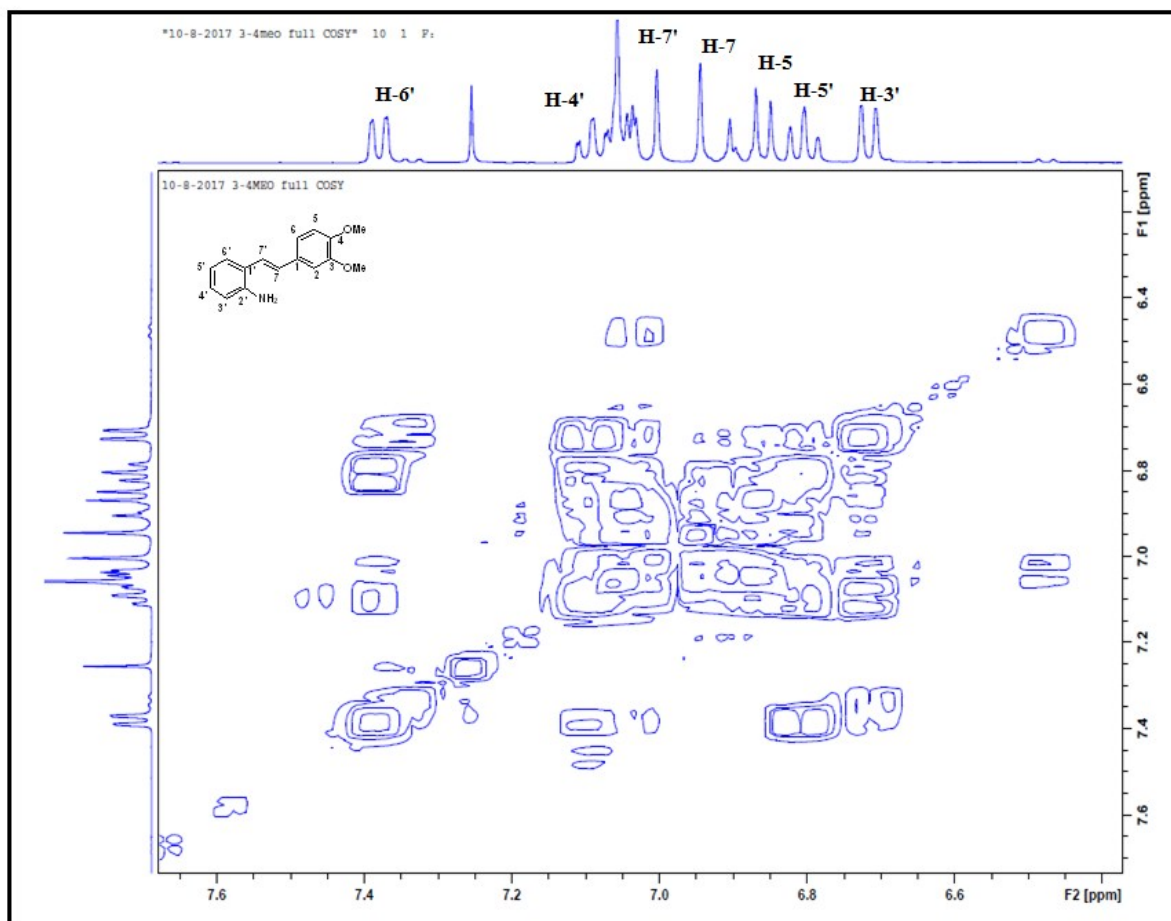

Figure S7: C COSY GPSW  $\{^1\text{H}\}$ ( $\text{CDCl}_3$ , 400MHz) spectrum of compound (E)-2-(3,4-dimethoxystyryl)aniline (EXPANSION).

2  
3  
4  
5  
6  
7  
8  
9  
10



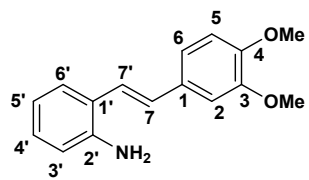

1

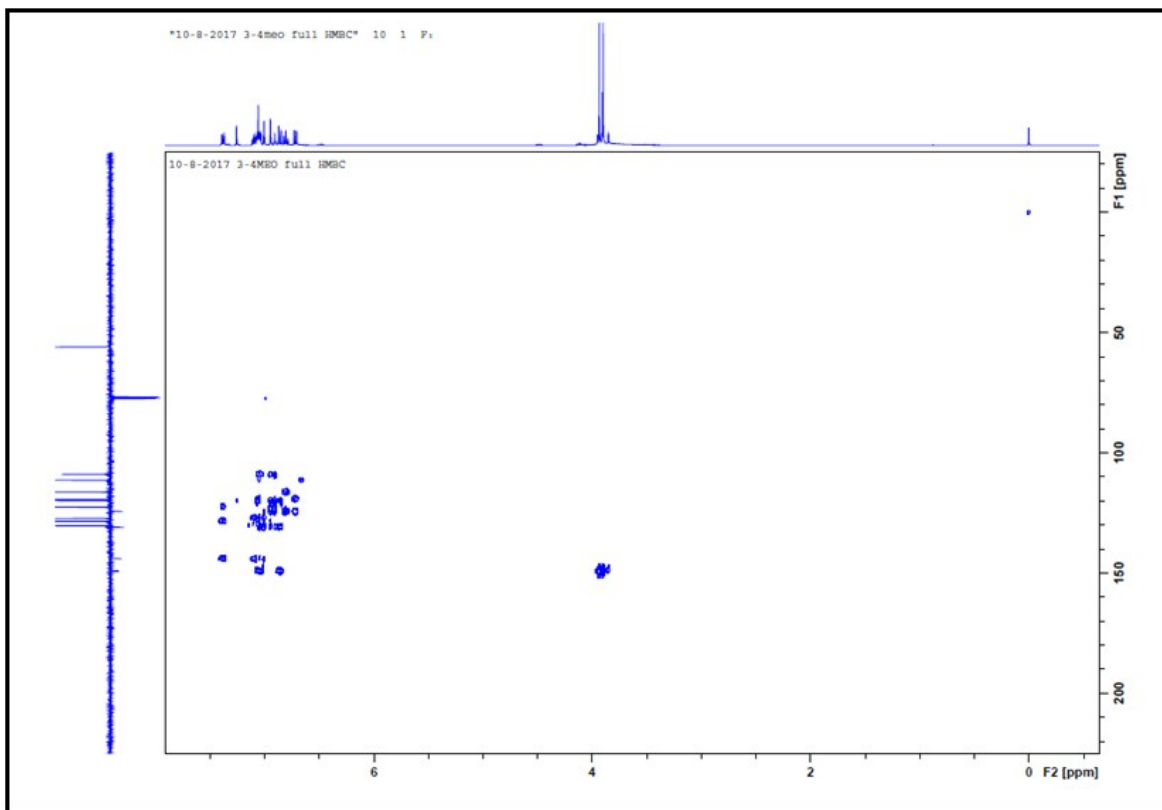

2  
3 **Figure S8: C HMBC GP  $\{^1\text{H}-^{13}\text{C}\}$ ( $\text{CDCl}_3$ , 400MHz) spectrum of compound (E)-2-(3,4-dimethoxystyryl)aniline.**

4

5

6

7

8

9

10

11

12

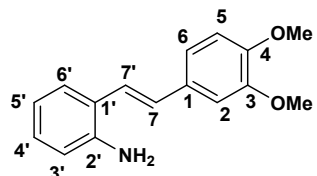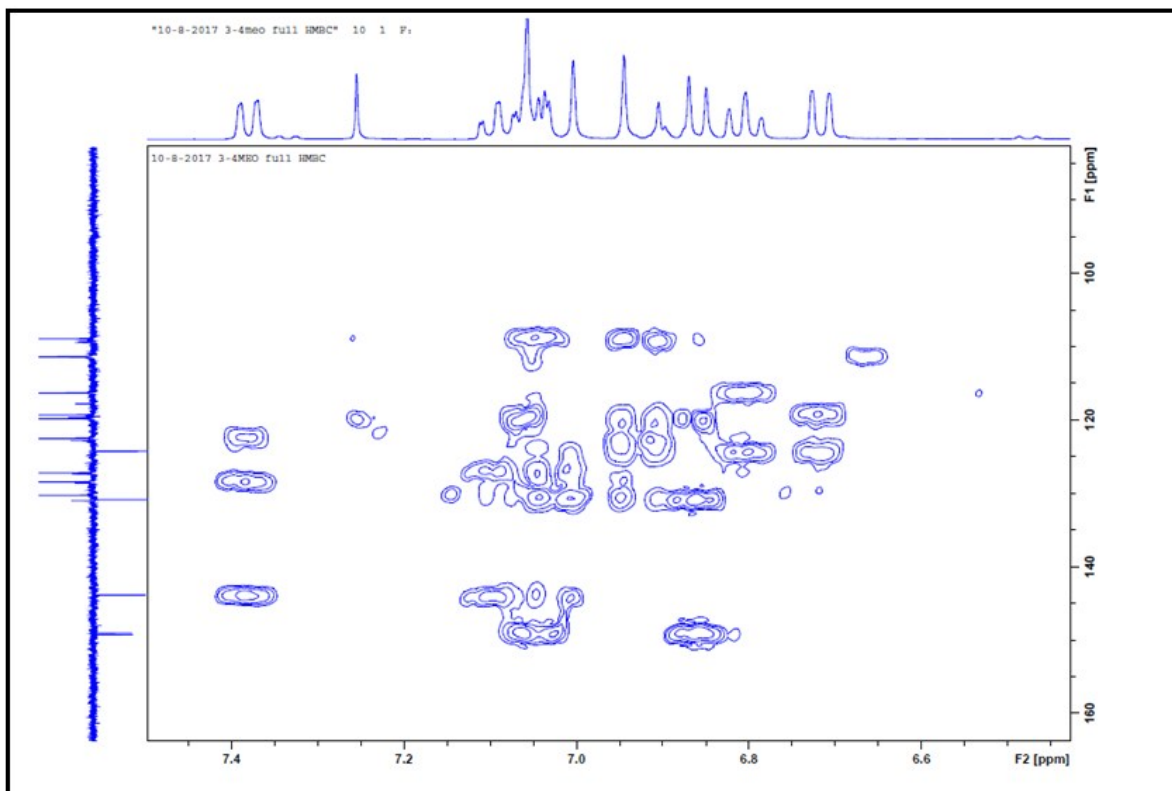

Figure S9: C HMBC GP  $\{^1\text{H}-^{13}\text{C}\}$ ( $\text{CDCl}_3$ , 400MHz) spectrum of compound (E)-2-(3,4-dimethoxystyryl)aniline (EXPANSION).

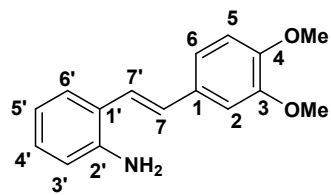

1

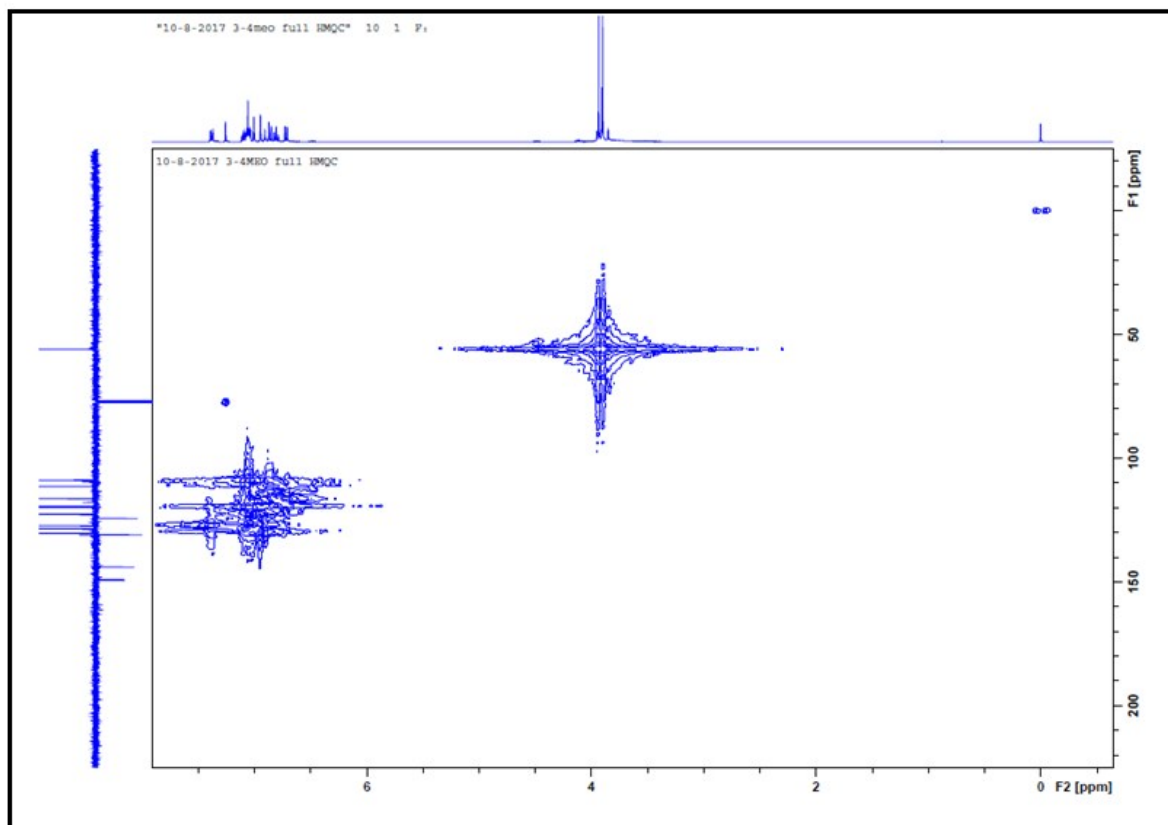

Figure S10:  $^{13}\text{C}$  HMQC GP  $\{^1\text{H}-^{13}\text{C}\}$  ( $\text{CDCl}_3$ , 400MHz) spectrum of compound (E)-2-(3,4-dimethoxystyryl)aniline.

2  
3  
4  
5  
6  
7  
8  
9  
10  
11  
12

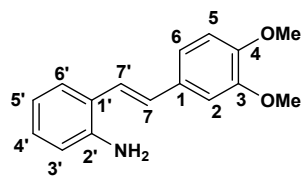

1

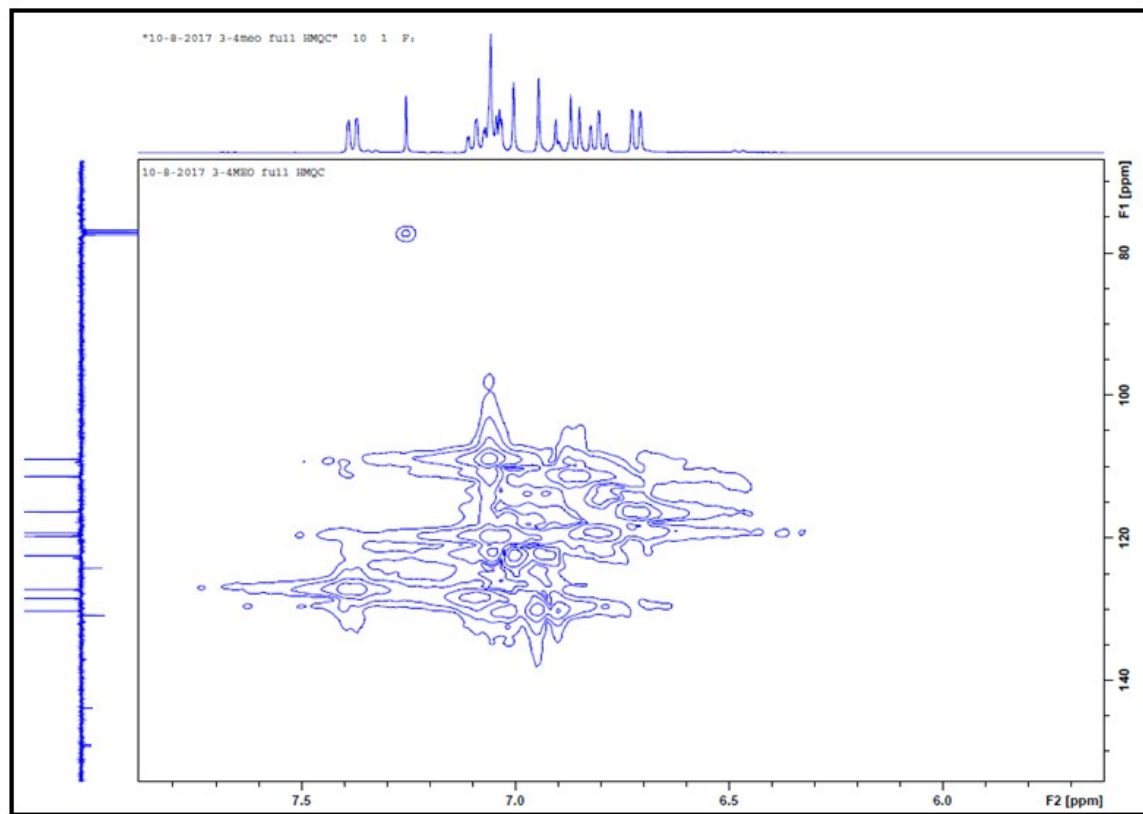

Figure S11:  $^1\text{H}$ - $^{13}\text{C}$  HMQC GP  $\{^1\text{H}$ - $^{13}\text{C}\}$ ( $\text{CDCl}_3$ , 400MHz) spectrum of compound (E)-2-(3,4-dimethoxystyryl)aniline (EXPANSION).

2  
3  
4  
5  
6  
7  
8  
9  
10  
11

1

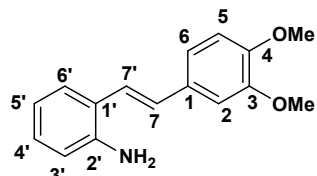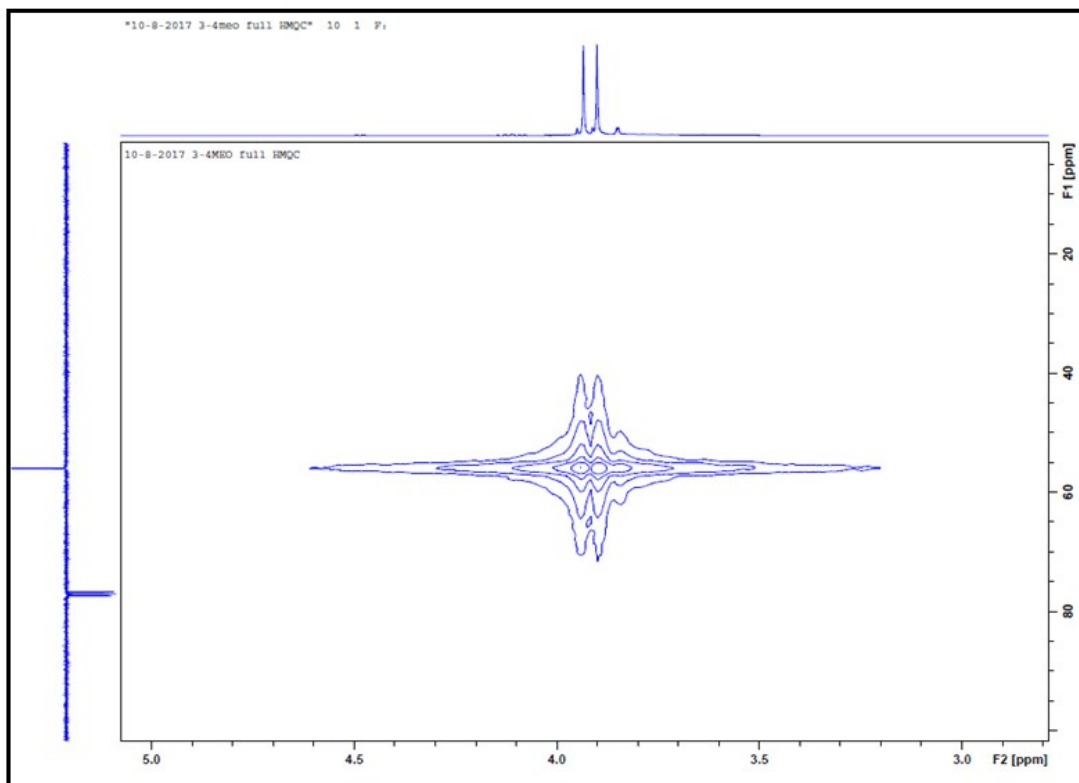

2

3

4

Figure S12: C HMQC GP {<sup>1</sup>H-<sup>13</sup>C}(CDCl<sub>3</sub>, 400MHz) spectrum of compound (E)-2-(3,4-dimethoxystyryl)aniline (EXPANSION).

5

6

7

8

9

10

11

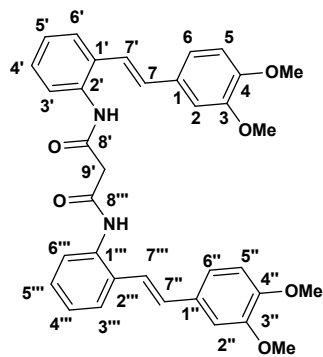

1

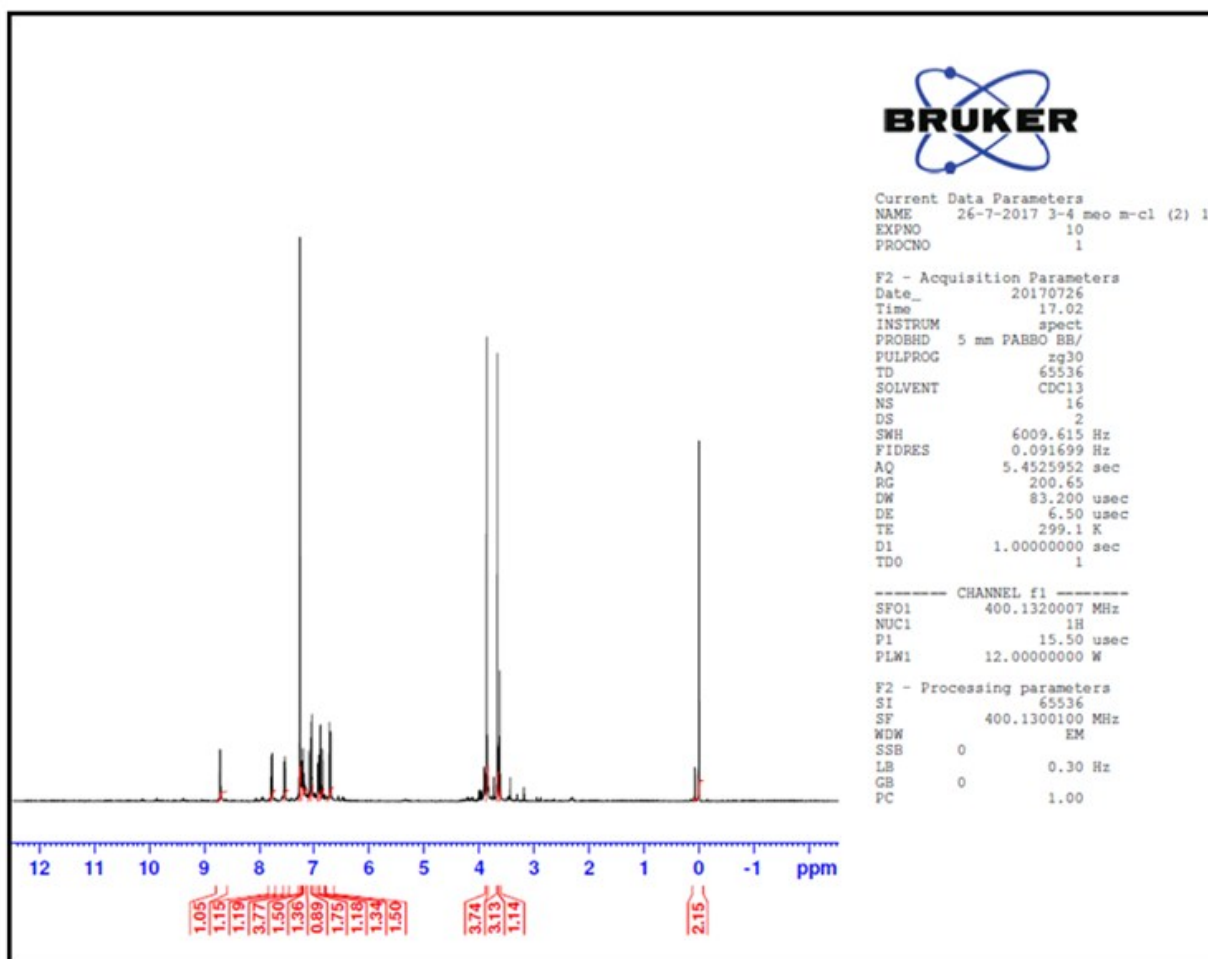

Figure S13: <sup>1</sup>H NMR (CDCl<sub>3</sub>, 400MHz) spectrum of compound bis(2-(E)-3,4-dimethoxystyryl)phenyl malonamide.

2

3

4

5

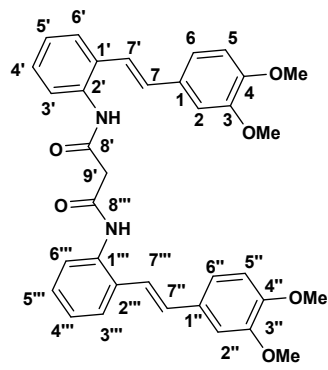

1

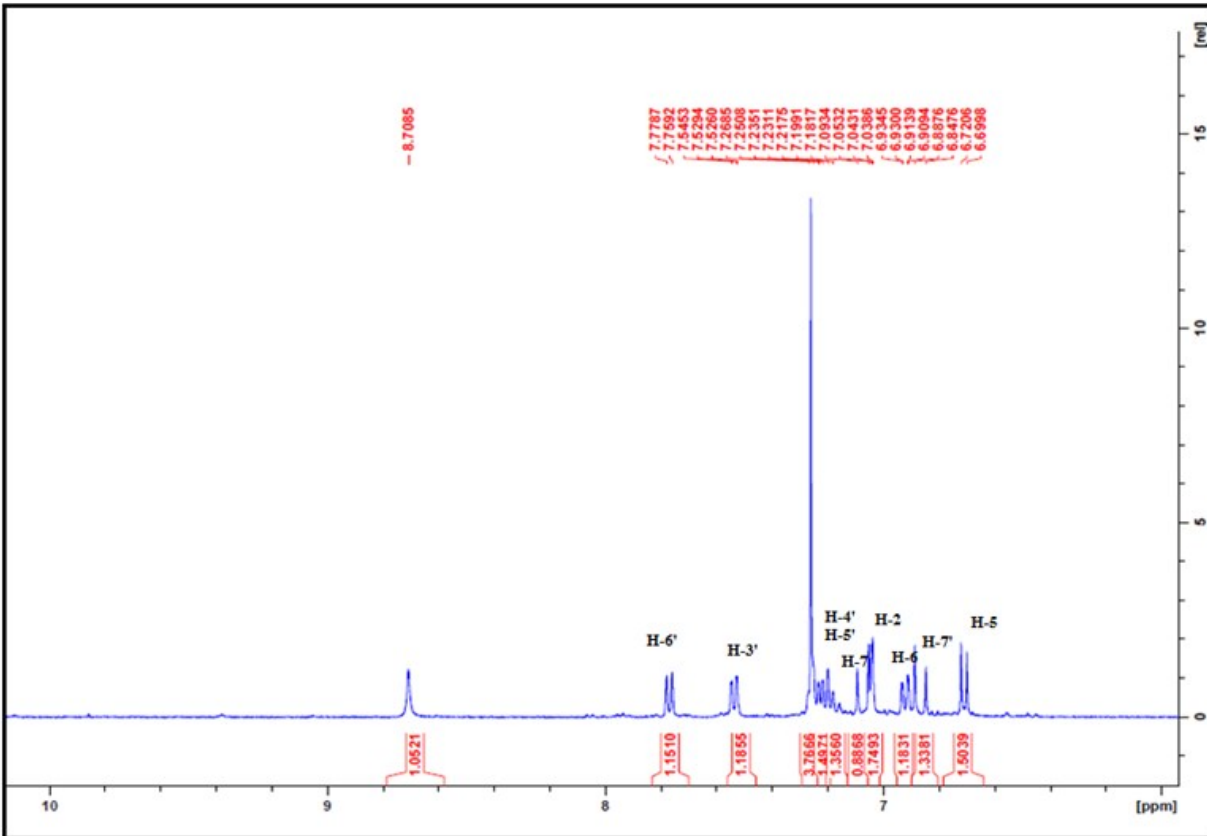

2  
3  
4  
5  
6  
7

Figure S14: <sup>1</sup>H NMR (CDCl<sub>3</sub>, 400MHz) spectrum of compound bis(2-(E)-3,4-dimethoxystyryl)phenyl malonamide (EXPANSION).

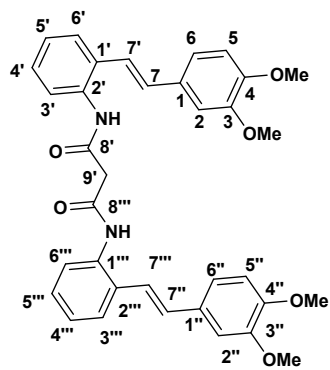

1

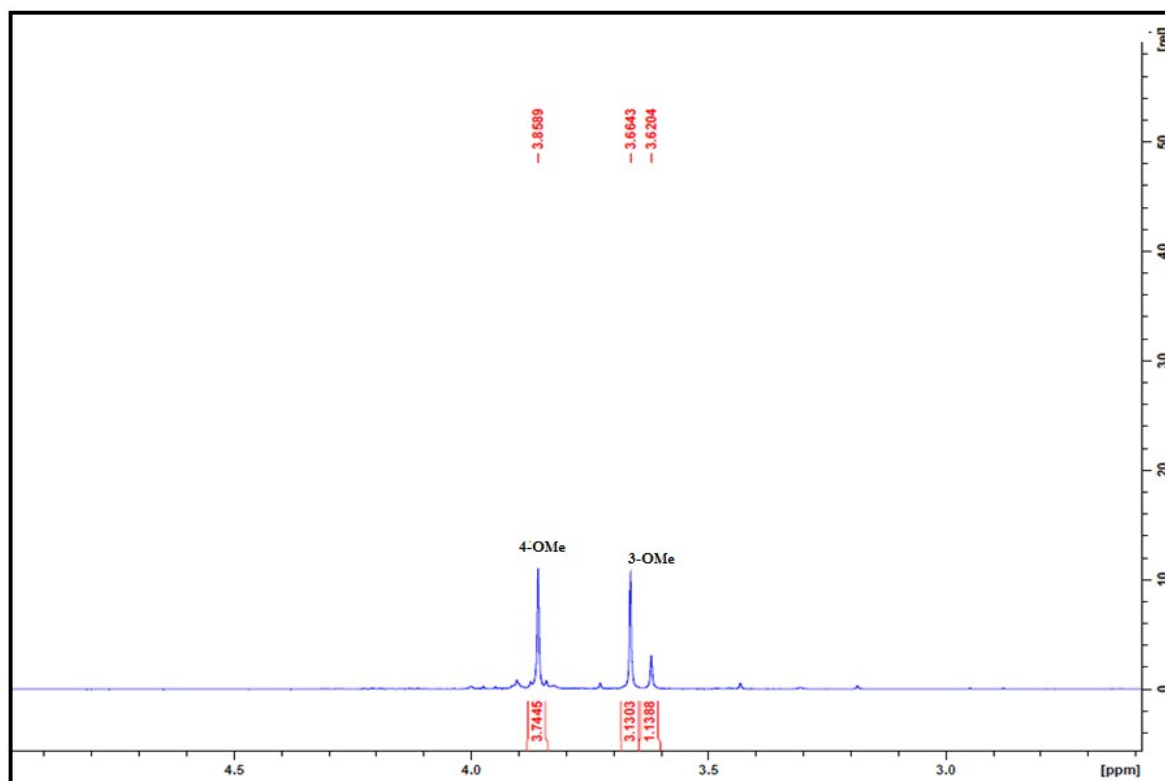

Figure S15:  $^1\text{H}$  NMR ( $\text{CDCl}_3$ , 400MHz) spectrum of compound bis(2-(E)-3,4-dimethoxystyryl)phenyl malonamide (EXPANSION).

2  
3  
4  
5  
6  
7  
8  
9



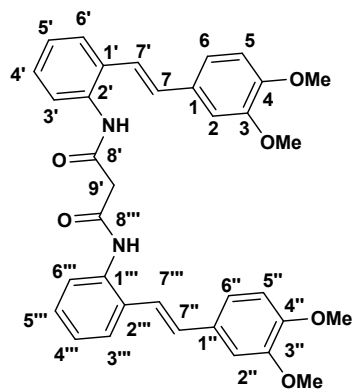

1

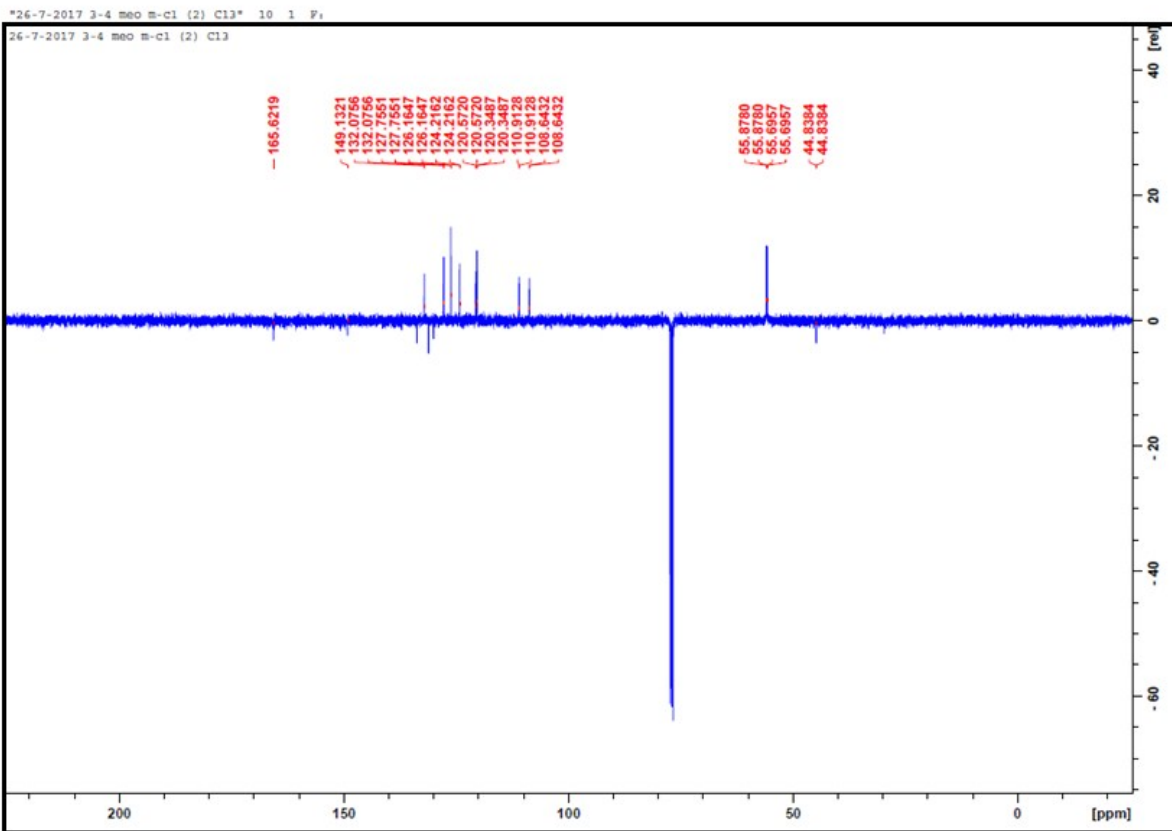

Figure S16:  $^{13}\text{C}$  DEPT135,  $\text{CH}_3/\text{CH}$  po  $\{^1\text{H}\}$  ( $\text{CDCl}_3$ , 400MHz) spectrum of compound bis(2-(E)-3,4-dimethoxystyryl)phenyl malonamide.

2  
 3  
 4  
 5  
 6  
 7  
 8

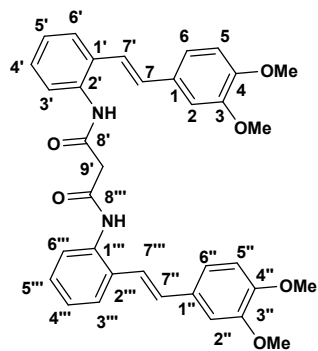

1

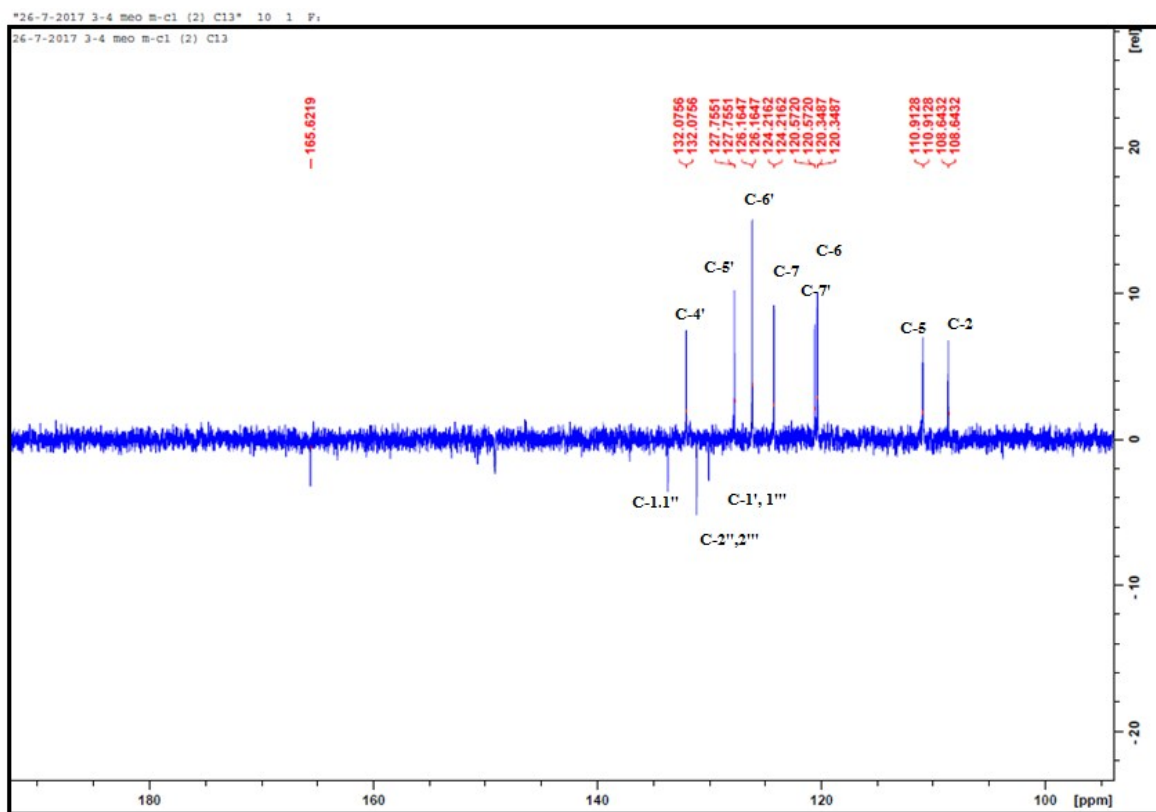

Figure S17:  $^{13}\text{C}$  DEPT135,  $\text{CH}_3/\text{CH}$  po  $\{^1\text{H}\}$  ( $\text{CDCl}_3$ , 400MHz) spectrum of compound bis(2-(E)-3,4-dimethoxystyryl)phenyl malonamide (EXPANSION).

2  
3  
4  
5  
6  
7  
8

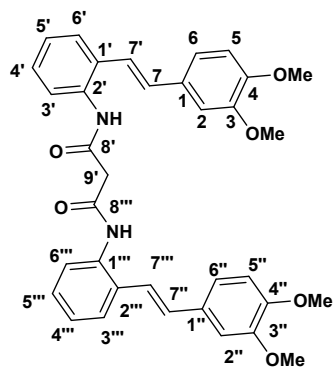

1

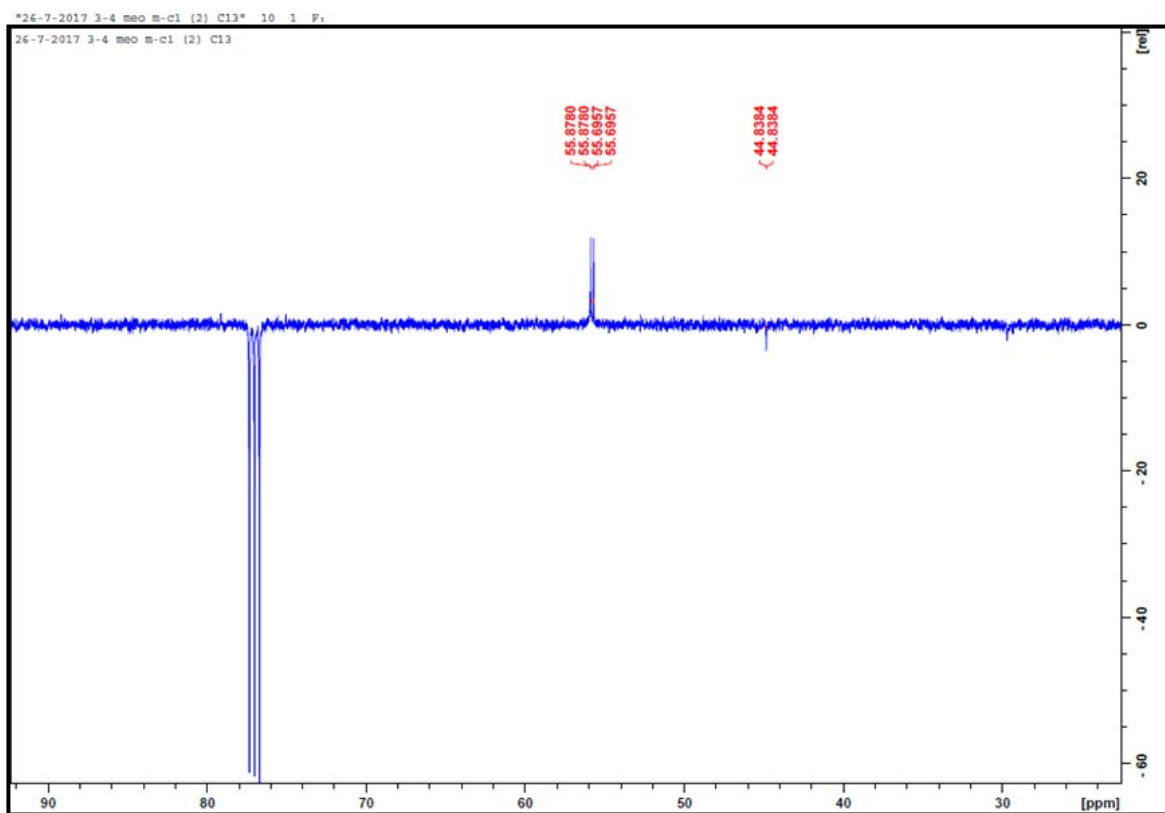

Figure S18:  $^{13}\text{C}$  DEPT135,  $\text{CH}_3/\text{CH}$  po  $\{^1\text{H}\}$  ( $\text{CDCl}_3$ , 400MHz) spectrum of compound bis (2-(E)-3,4-dimethoxystyryl)phenyl malonamide (EXPANSION).

2  
3  
4  
5  
6  
7  
8

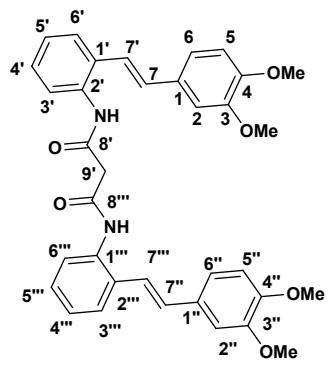

1

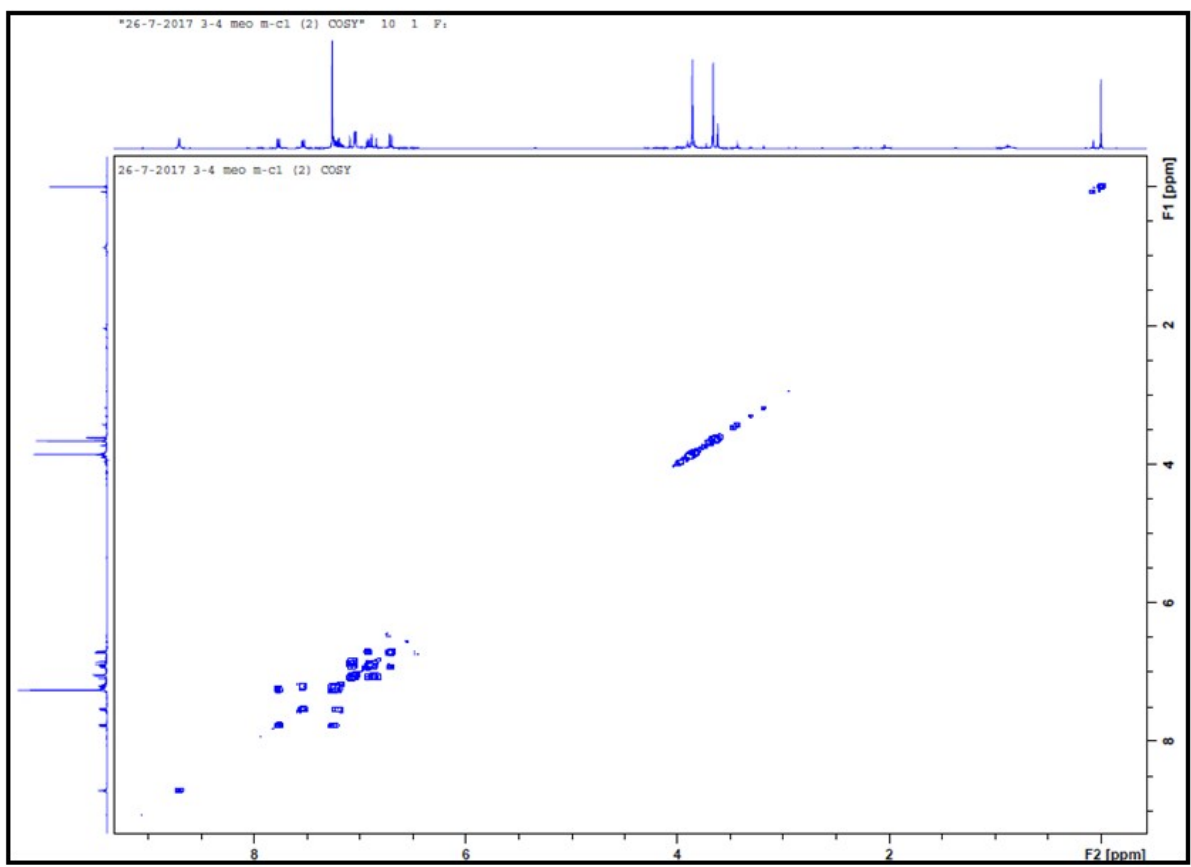

2  
3  
4  
5  
6  
7

Figure S19: C COSY GPSW  $\{^1\text{H}\}$ ( $\text{CDCl}_3$ , 400MHz) spectrum of compound bis (2-(E)-3,4-dimethoxystyryl)phenyl malonamide.

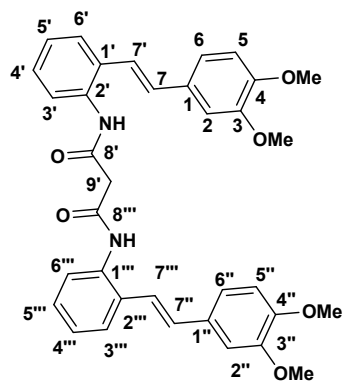

1

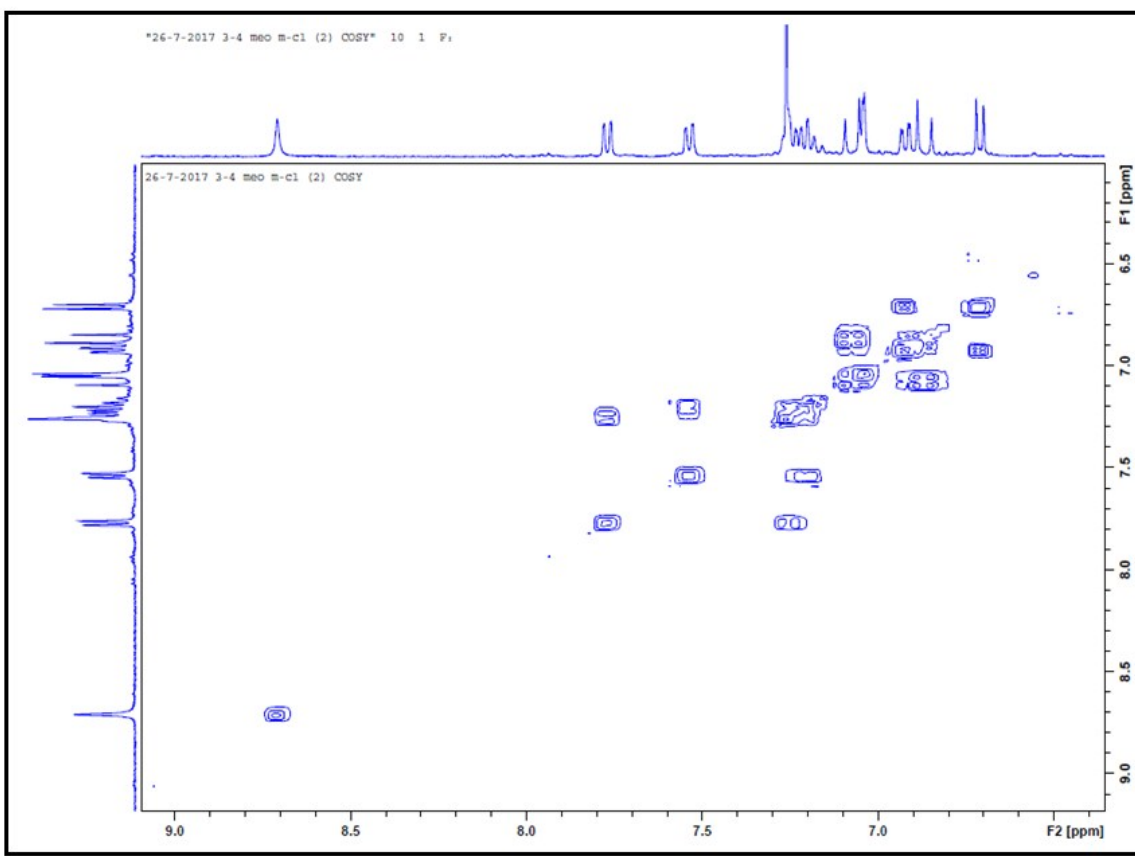

Figure S20: <sup>2</sup>C COSY GPSW <sup>1</sup>H(CDCl<sub>3</sub>, 400MHz) spectrum of compound bis (2-(E))-3,4-dimethoxystyryl)phenyl malonamide (EXPANSION).

2  
3  
4  
5  
6  
7  
8

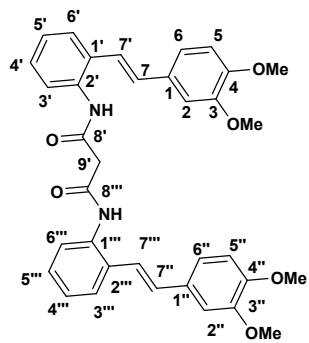

1

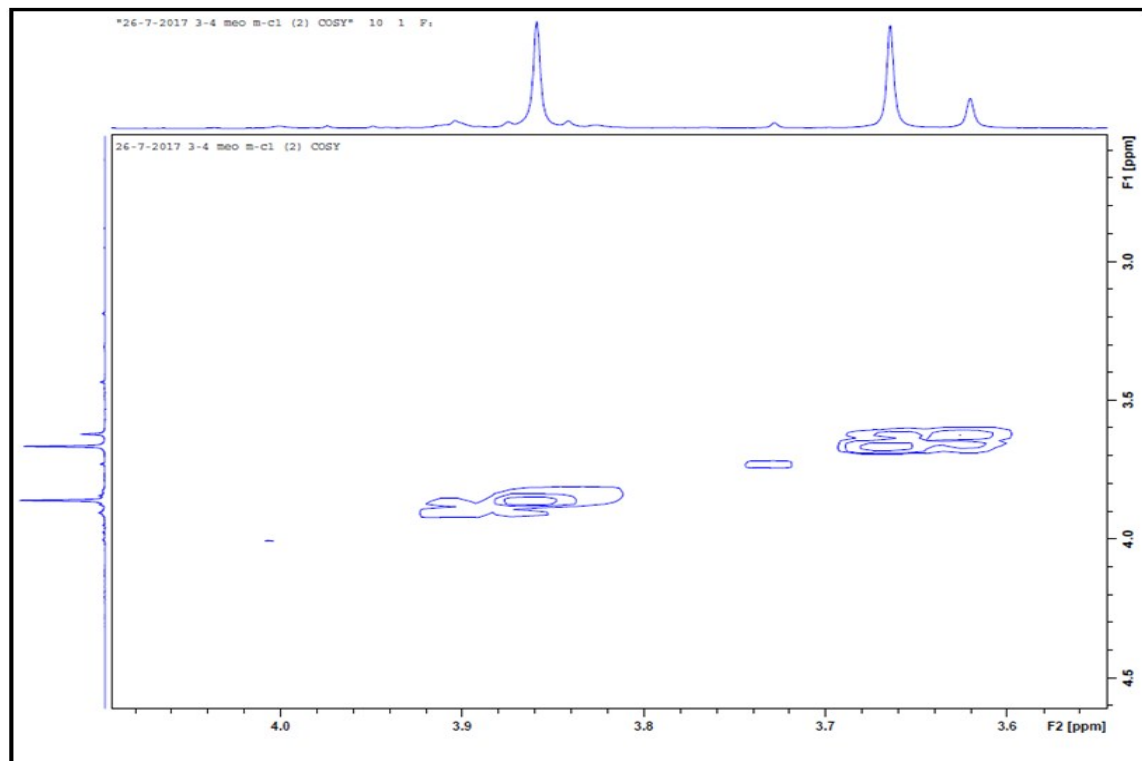

2

3

Figure S21: C COSY GPSW  $\{^1\text{H}\}$ ( $\text{CDCl}_3$ , 400MHz) spectrum of compound bis(2-(E)-3,4 dimethoxystyryl)phenyl malonamide (EXPANSION).

4

5

6

7

8

9



1

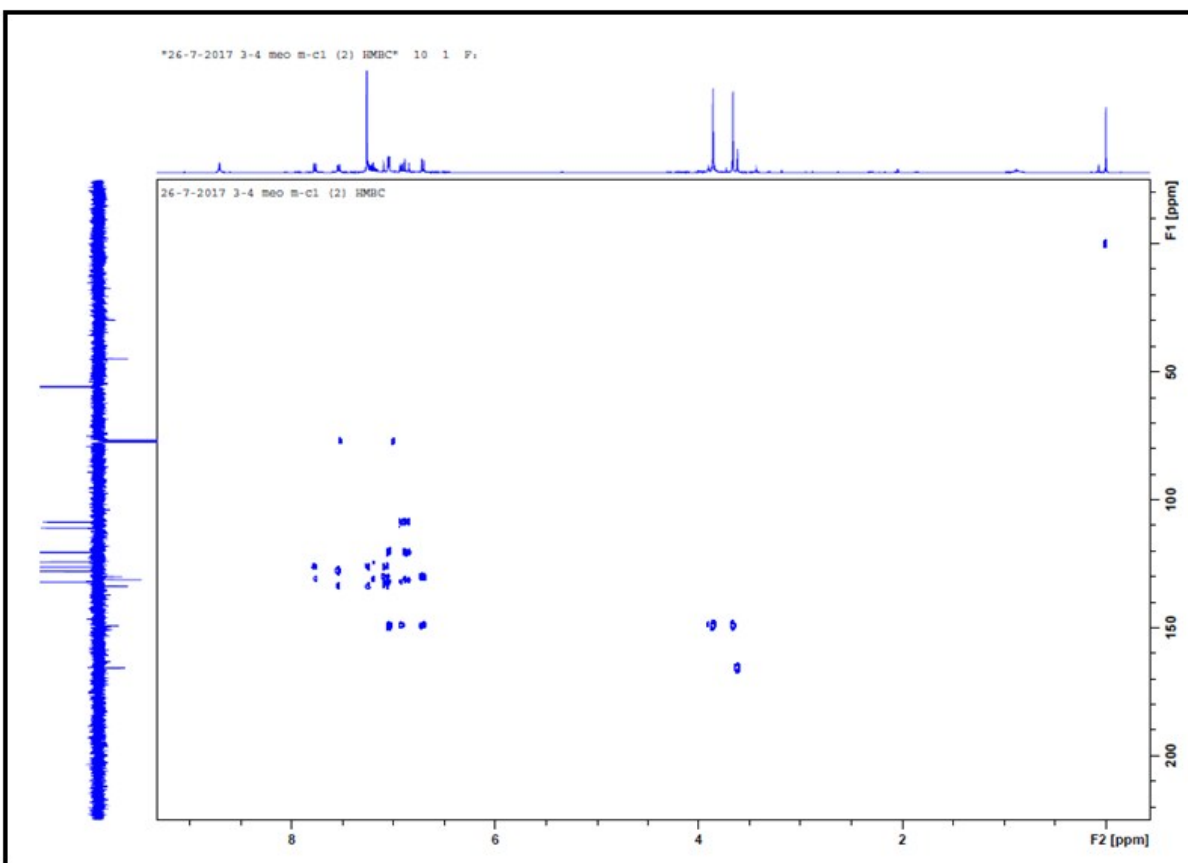

2  
3  
4  
5  
6  
7

Figure S22: C HMBC GP  $\{^1\text{H}-^{13}\text{C}\}$ ( $\text{CDCl}_3$ , 400MHz) spectrum of compound bis (2-(E))-3,4-dimethoxystyryl)phenyl malonamide.

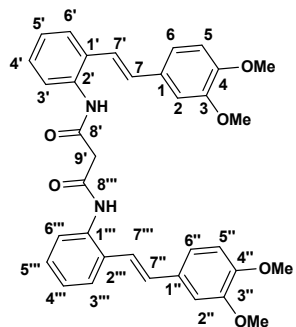

1

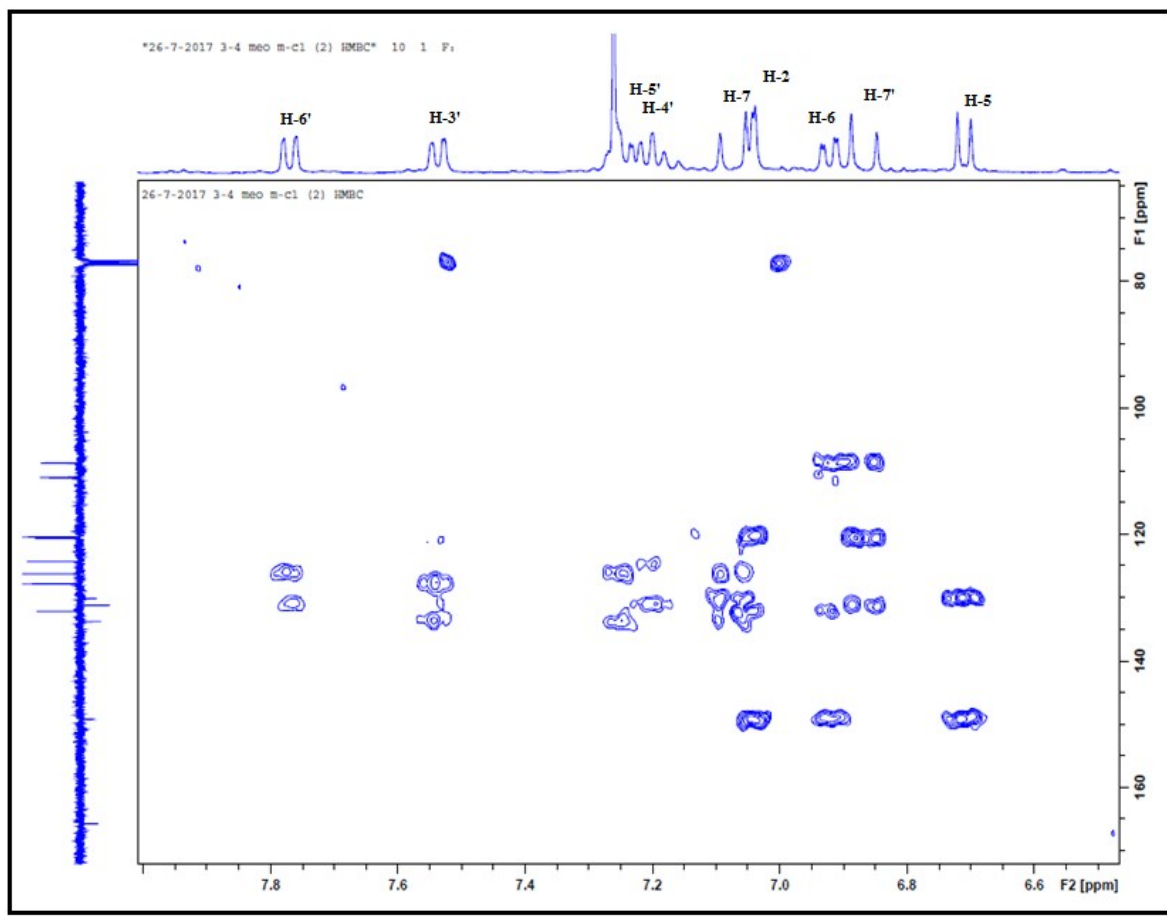

2

3

4

Figure S23: C HMBC GP  $\{^1\text{H}-^{13}\text{C}\}$ ( $\text{CDCl}_3$ , 400MHz) spectrum of compound bis (2-(E))-3,4-dimethoxystyryl)phenyl malonamide (EXPANSION).

5

6



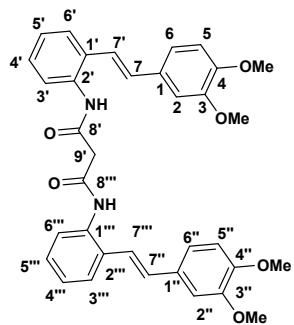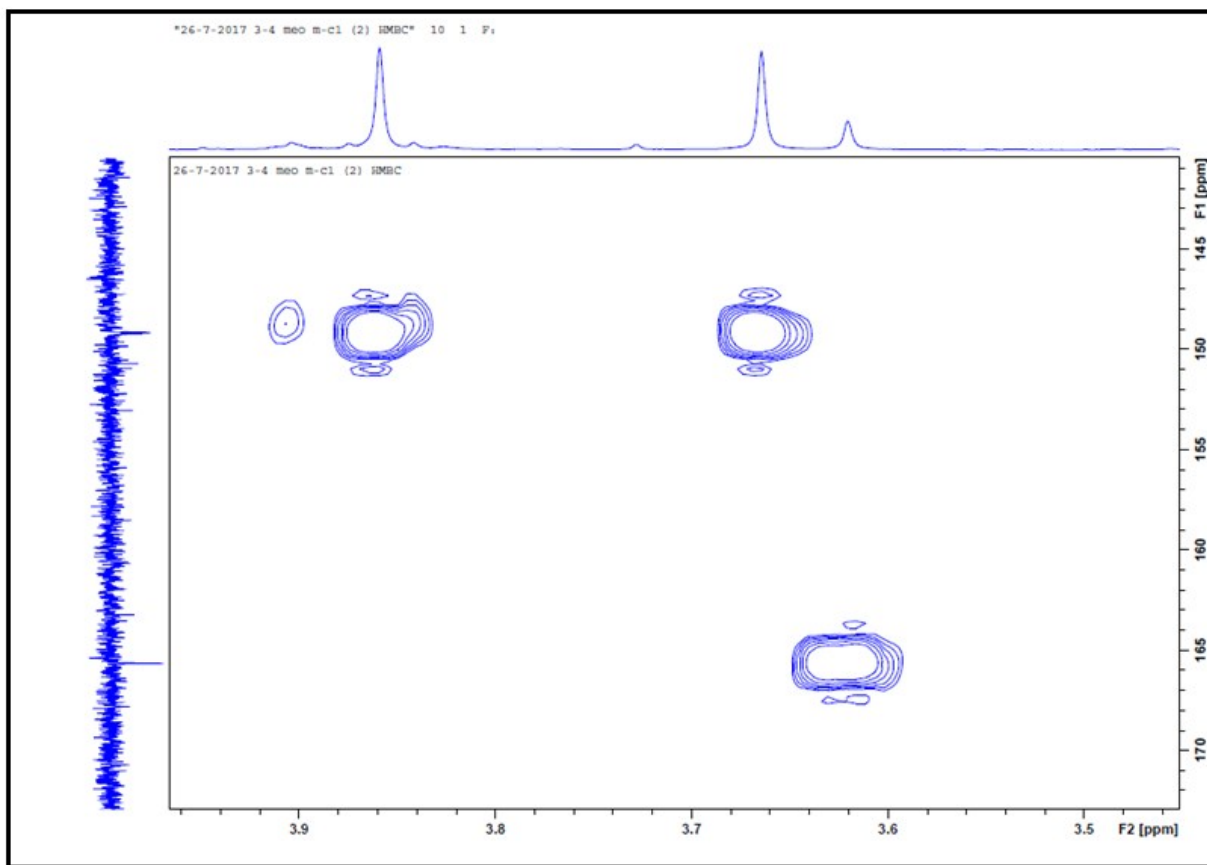

Figure S24: C HMBC GP  $\{^1\text{H}-^{13}\text{C}\}$ ( $\text{CDCl}_3$ , 400MHz) spectrum of compound bis (2-(E))-3,4-dimethoxystyryl)phenyl malonamide (EXPANSION).

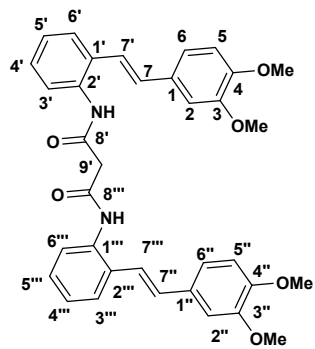

1

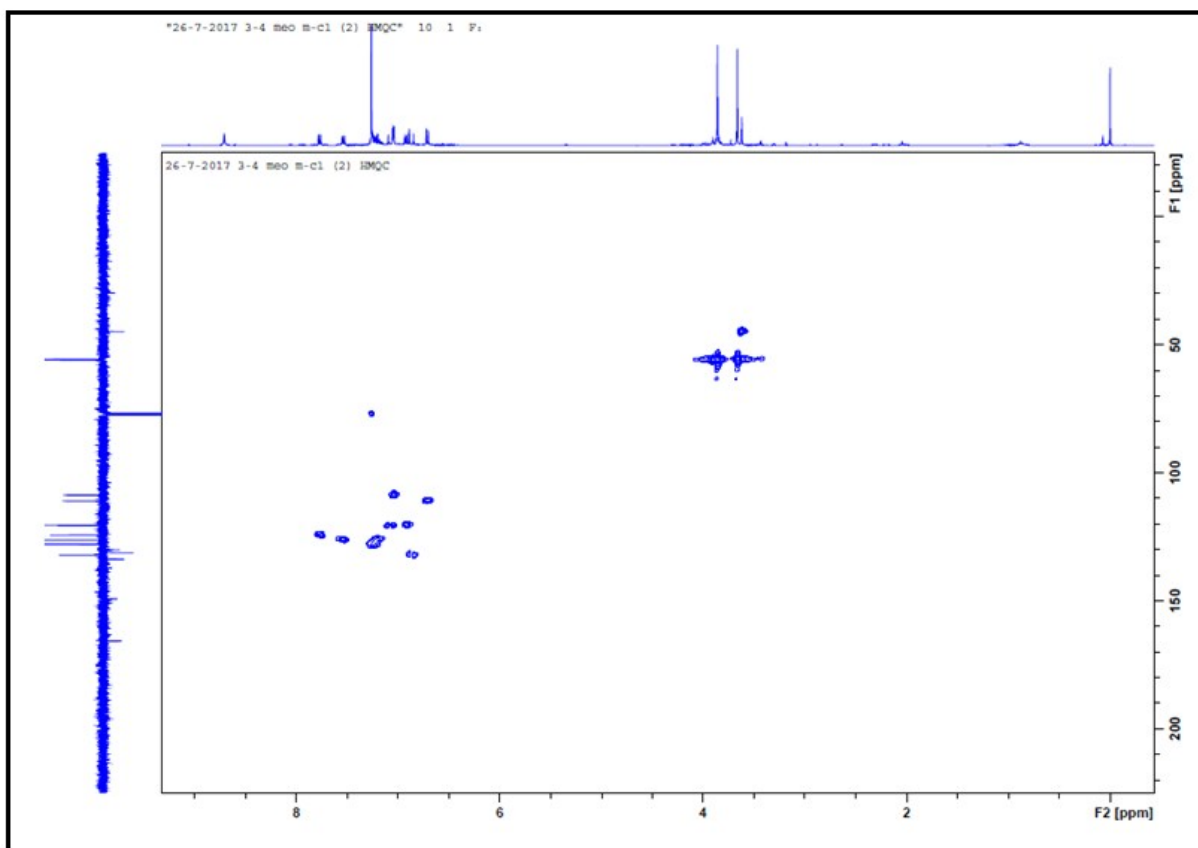

2

3

4

5

6

**Figure S25: C HMQC GP  $\{^1\text{H}-^{13}\text{C}\}$ ( $\text{CDCl}_3$ , 400MHz) spectrum of compound bis (2-(E))-3,4-dimethoxystyryl)phenyl malonamide.**

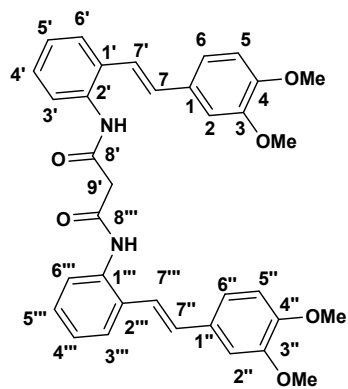

1

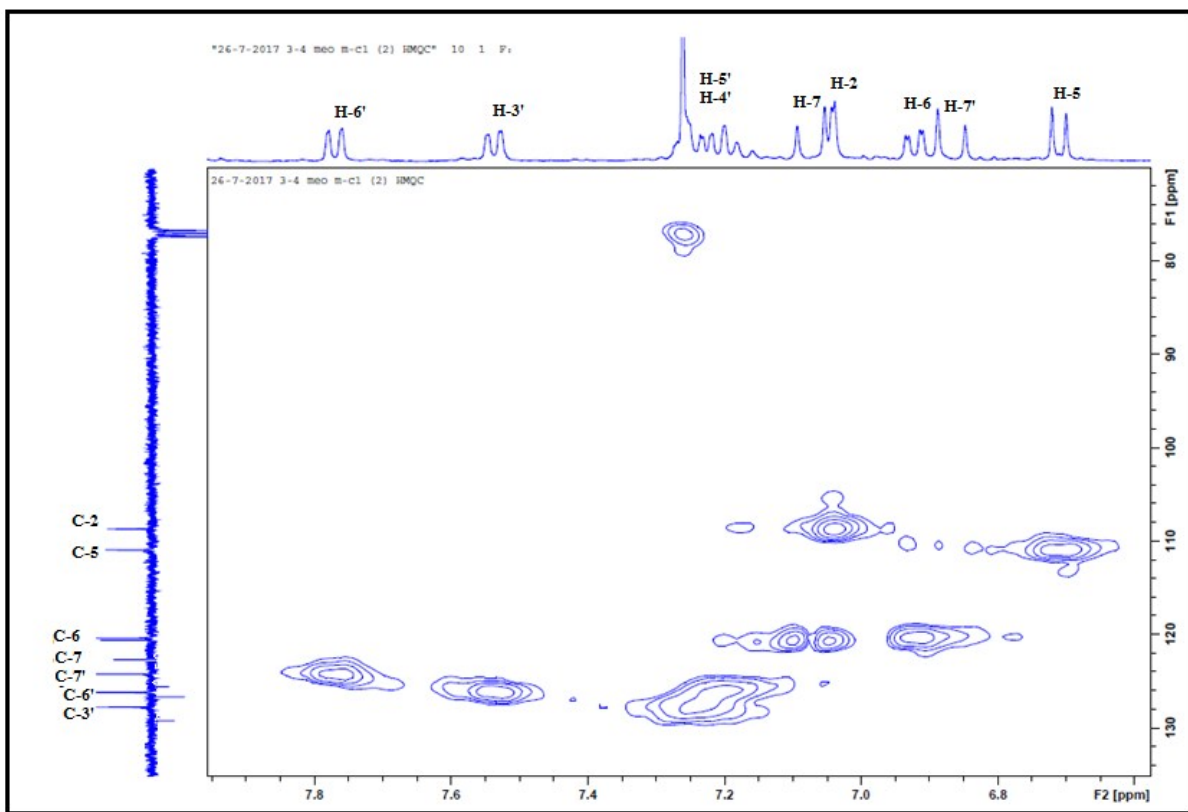

Figure S26: C HMQC GP  $\{^1\text{H}-^{13}\text{C}\}$ ( $\text{CDCl}_3$ , 400MHz) spectrum of compound bis (2-(E))-3,4-dimethoxystyryl)phenyl malonamide (EXPANSION).

2  
3  
4  
5  
6  
7  
8

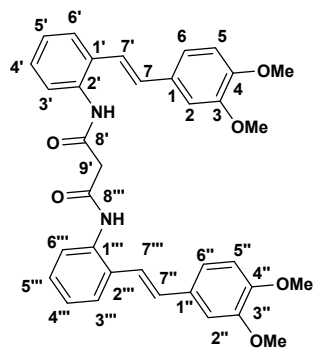

1

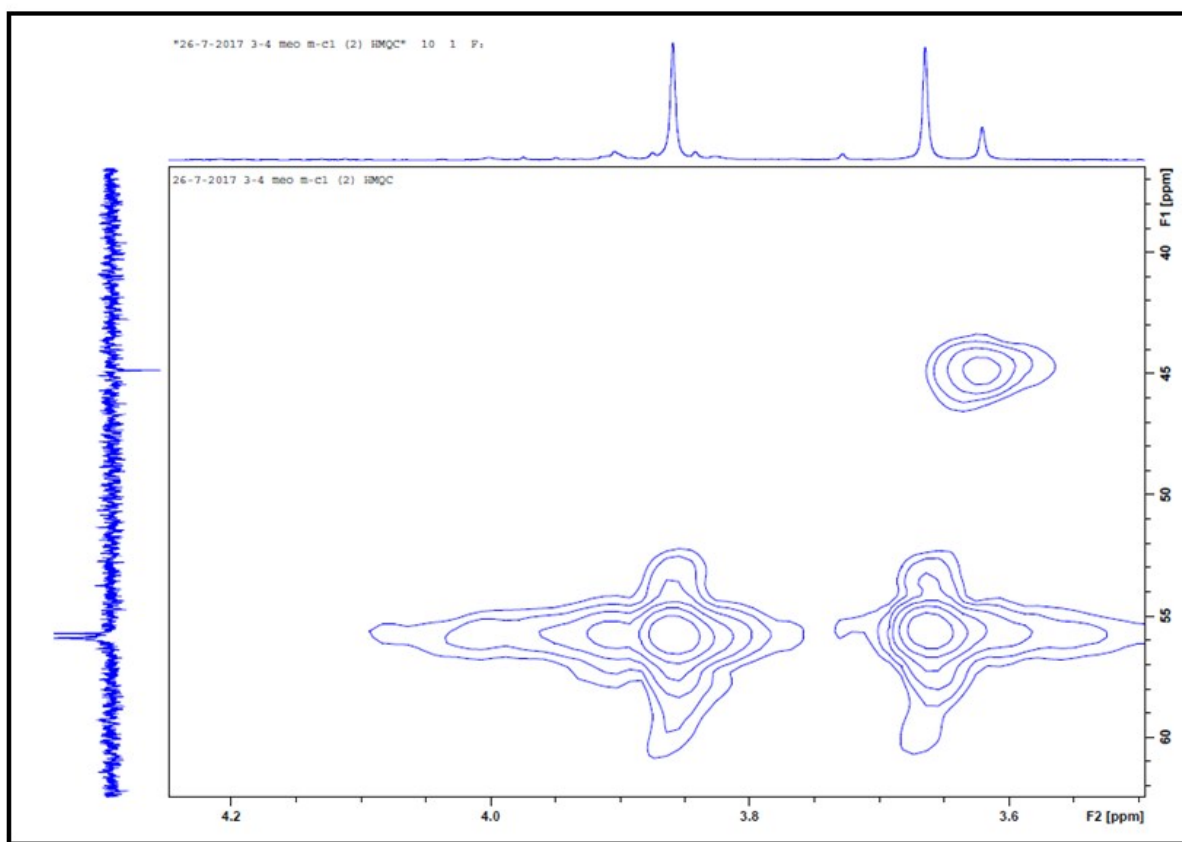

2  
3  
4  
5  
6  
7  
Figure S27: C HMQC GP  $\{^1\text{H}-^{13}\text{C}\}$ ( $\text{CDCl}_3$ , 400MHz) spectrum of compound bis (2-(E)-3,4-dimethoxystyryl)phenyl malonamide (EXPANSION).

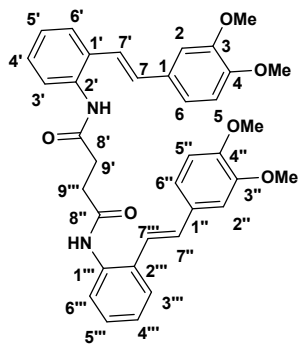

1

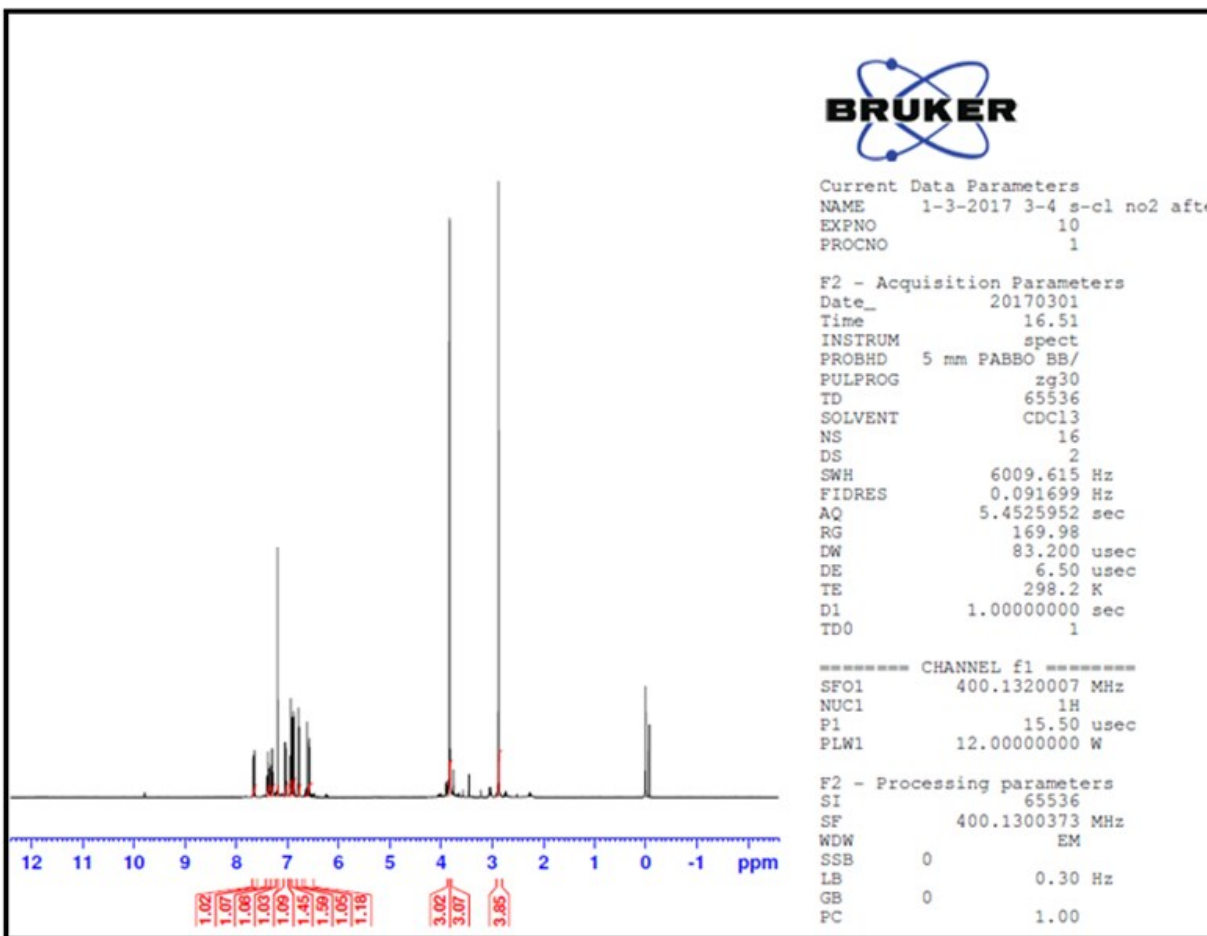

2

3

Figur28: <sup>1</sup>H NMR (CDCl<sub>3</sub>, 400MHz) spectrum of compound bis(2((E)-(3,4-dimethoxystyryl)phenyl)succinamide).

4

5

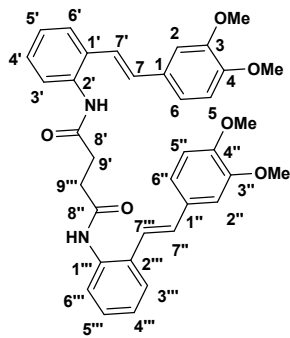

1

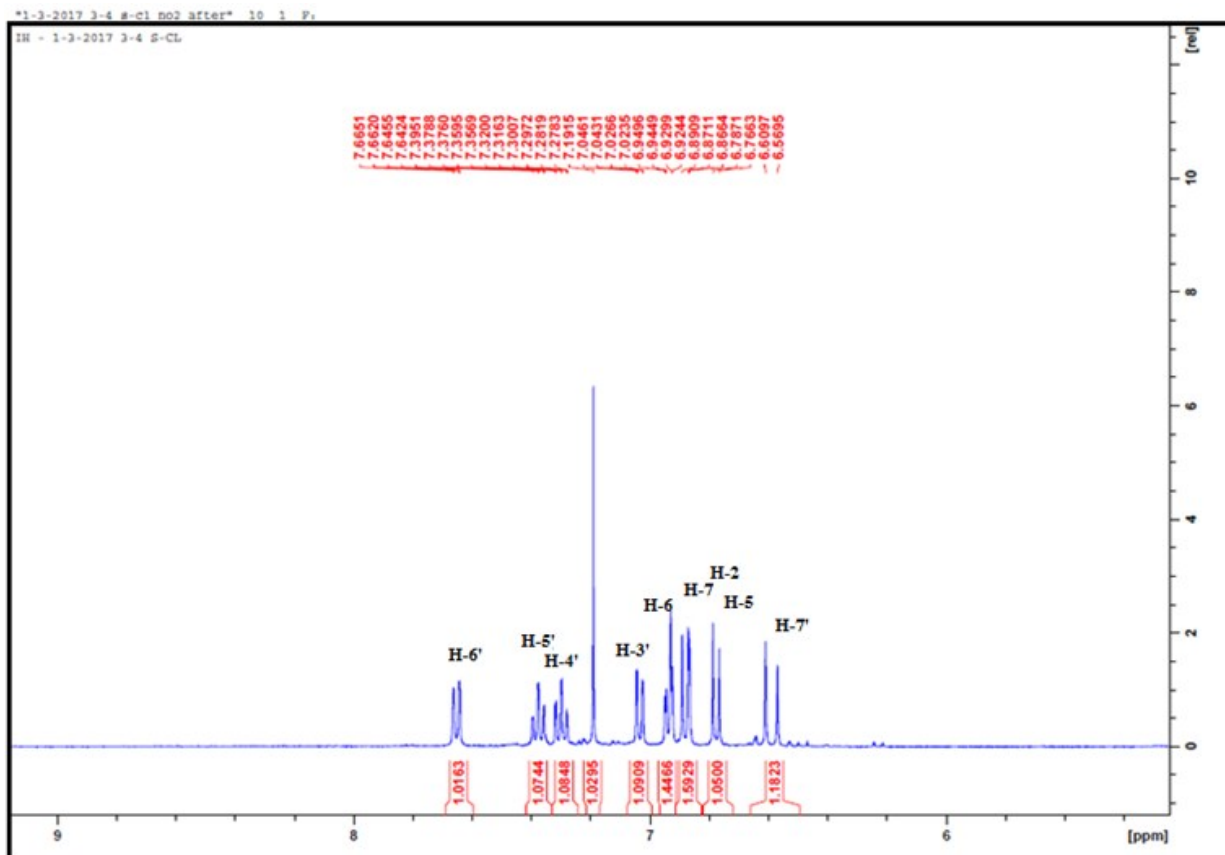

2

3

4

5

6

7

8

9

Figure S29: <sup>1</sup>H NMR (CDCl<sub>3</sub>, 400MHz) spectrum of compound bis(2((E)-(3,4-dimethoxystyryl)phenyl)succinamide) (EXPANSION).

1

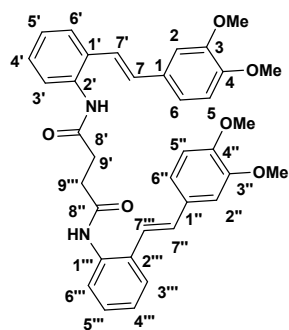

2

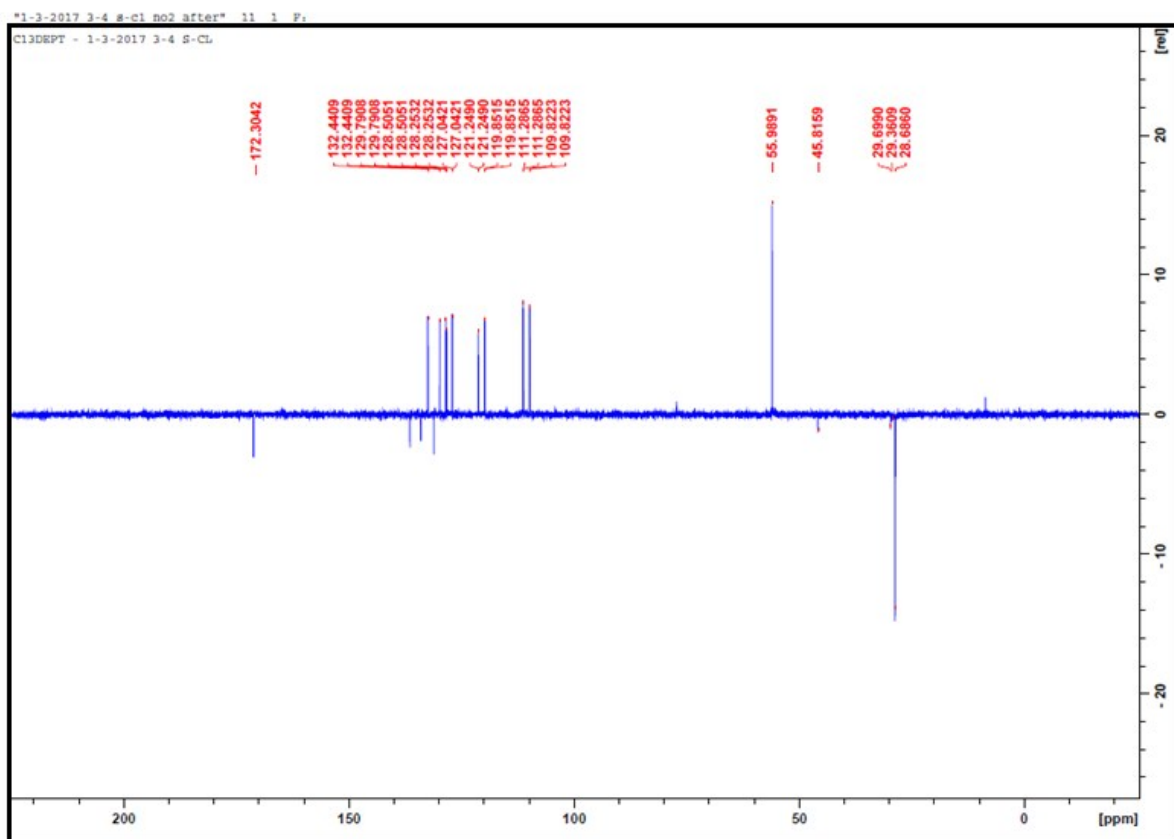

3

4

5

Figure S30:  $^{13}\text{C}$  DEPT135,  $\text{CH}_3/\text{CH}$  po  $\{^1\text{H}\}$  ( $\text{CDCl}_3$ , 400MHz) spectrum of compound bis(2((E)-(3,4-dimethoxystyryl)phenyl)succinamide).

6

7

8

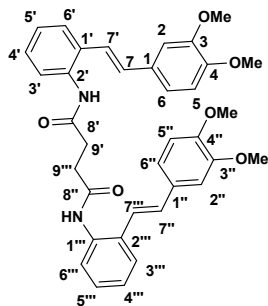

1

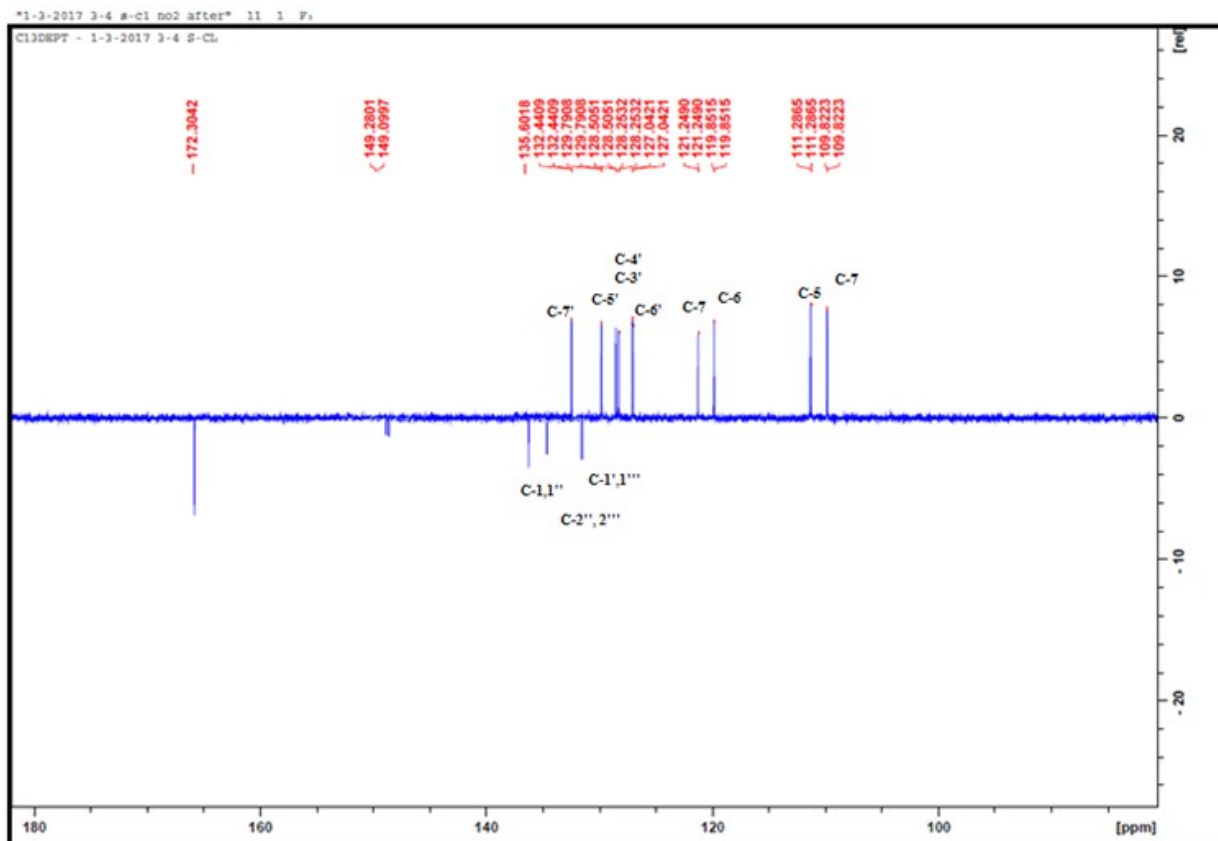

Figure S31:  $^{13}\text{C}$  DEPT135,  $\text{CH}_3/\text{CH}$  po  $\{^1\text{H}\}$  ( $\text{CDCl}_3$ , 400MHz) spectrum of compound bis(2((E)-(3,4-dimethoxystyryl)phenyl)succinamide) (EXPANSION).

2  
 3  
 4  
 5  
 6  
 7  
 8  
 9  
 10



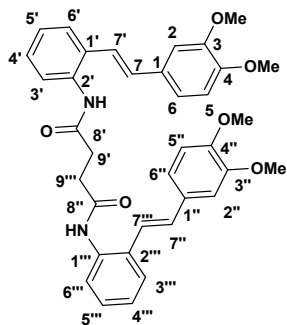

1

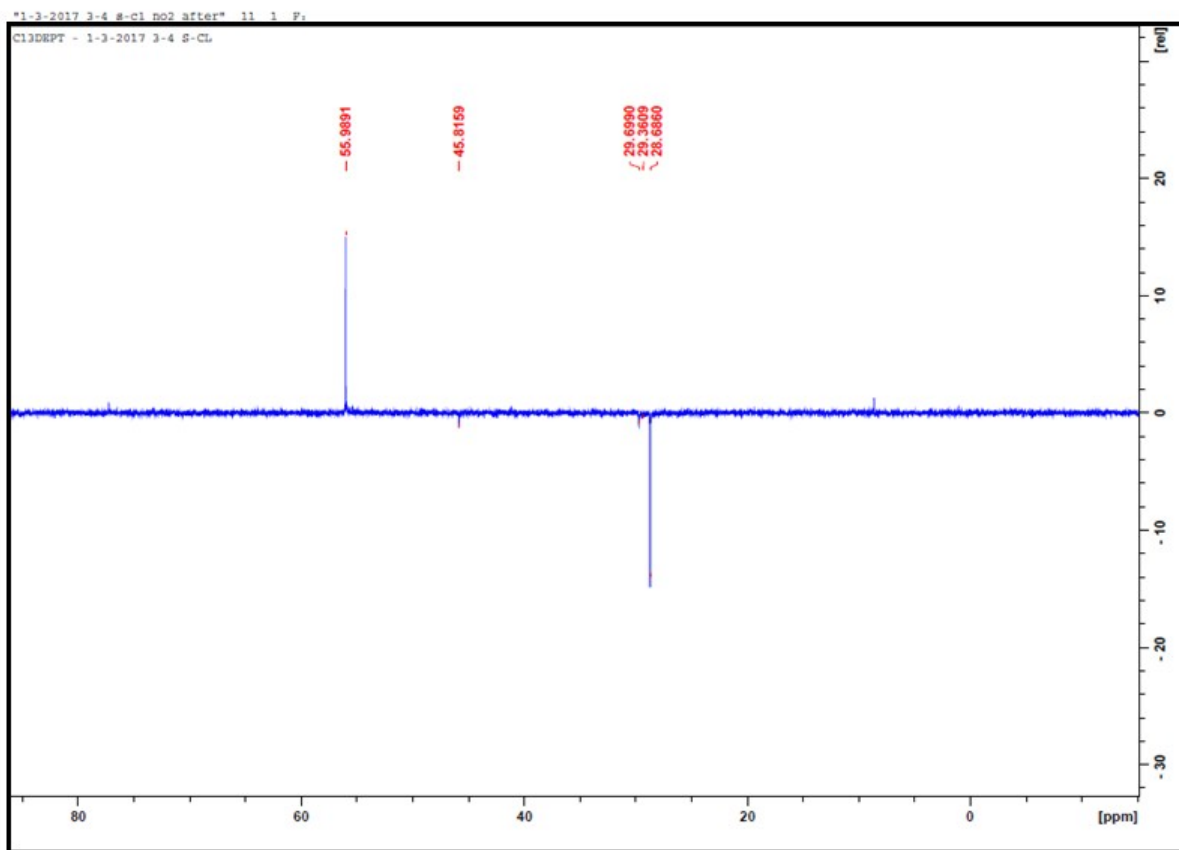

2

3

4

5

6

7

8

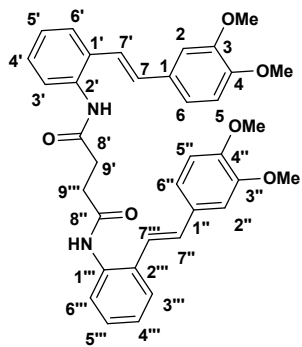

1

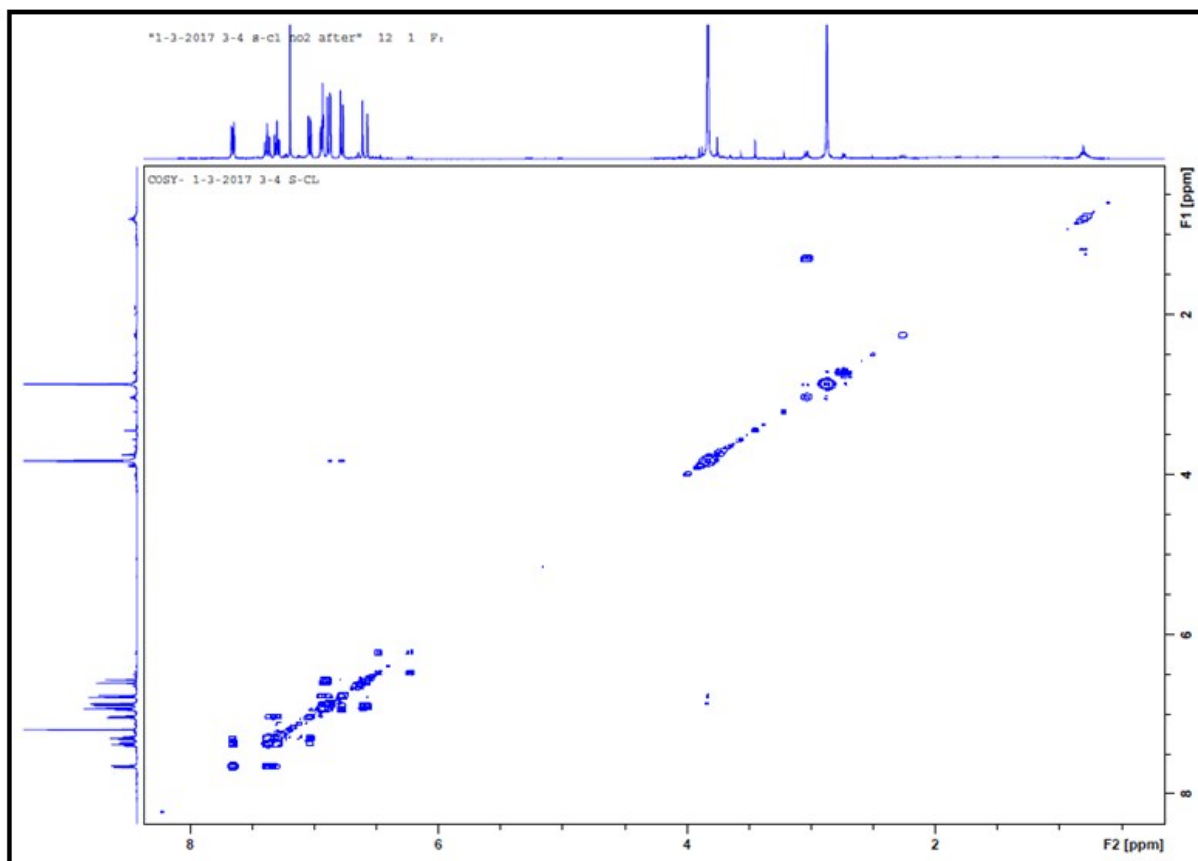

Figure S33: C COSY GPSW  $\{^1\text{H}\}$ ( $\text{CDCl}_3$ , 400MHz) spectrum of compound bis(2((E)-(3,4-dimethoxystyryl)phenyl)succinamide).

2  
3  
4  
5  
6  
7

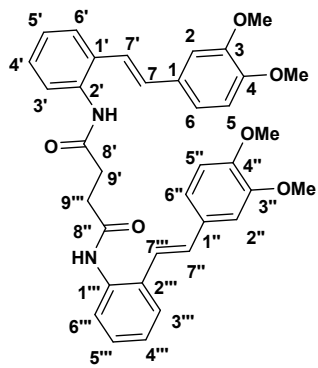

1

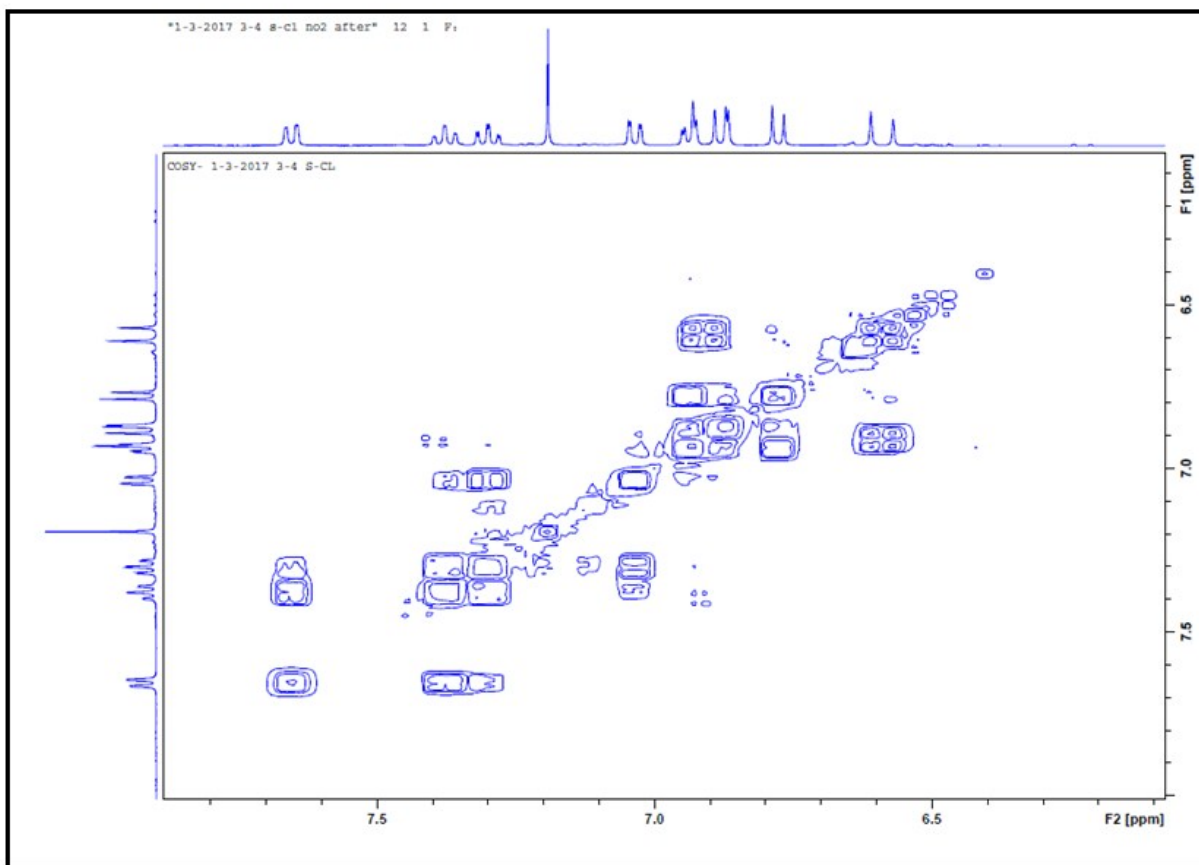

Figure S34:  $^1\text{H}$  COSY GPSW  $\{^1\text{H}\}$ ( $\text{CDCl}_3$ , 400MHz) spectrum of compound bis(2((E)-(3,4-dimethoxystyryl)phenyl)succinamide (EXPANSION).

2  
3  
4  
5  
6  
7  
8

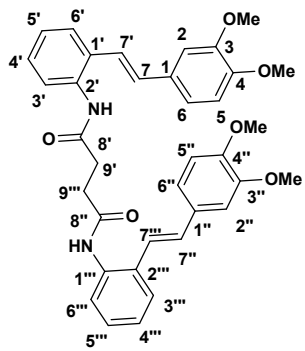

1

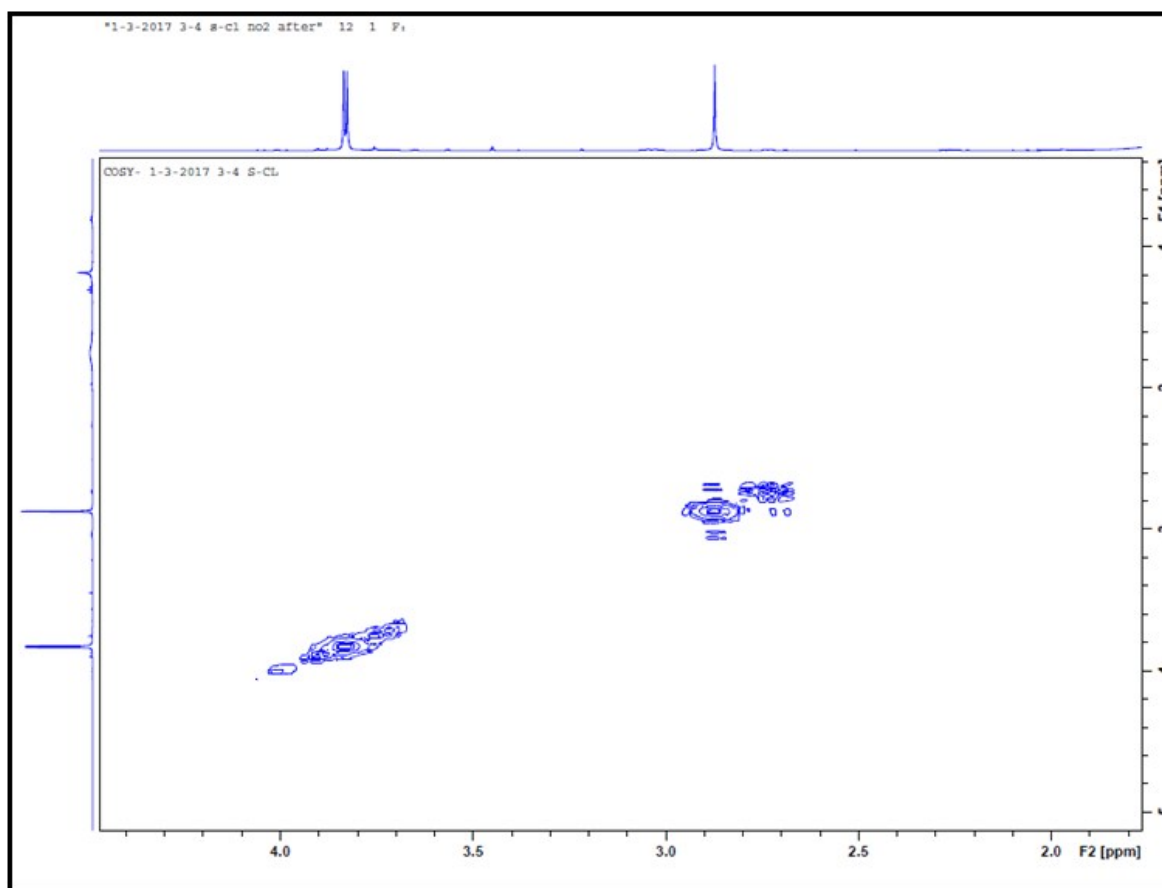

Figure S35: C COSY GPSW  $\{^1\text{H}\}$ ( $\text{CDCl}_3$ , 400MHz) spectrum of compound bis(2((E)-(3,4-dimethoxystyryl)phenyl)succinamide (EXPANSION).

2  
3  
4  
5  
6

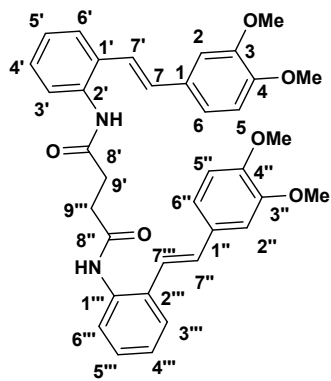

1

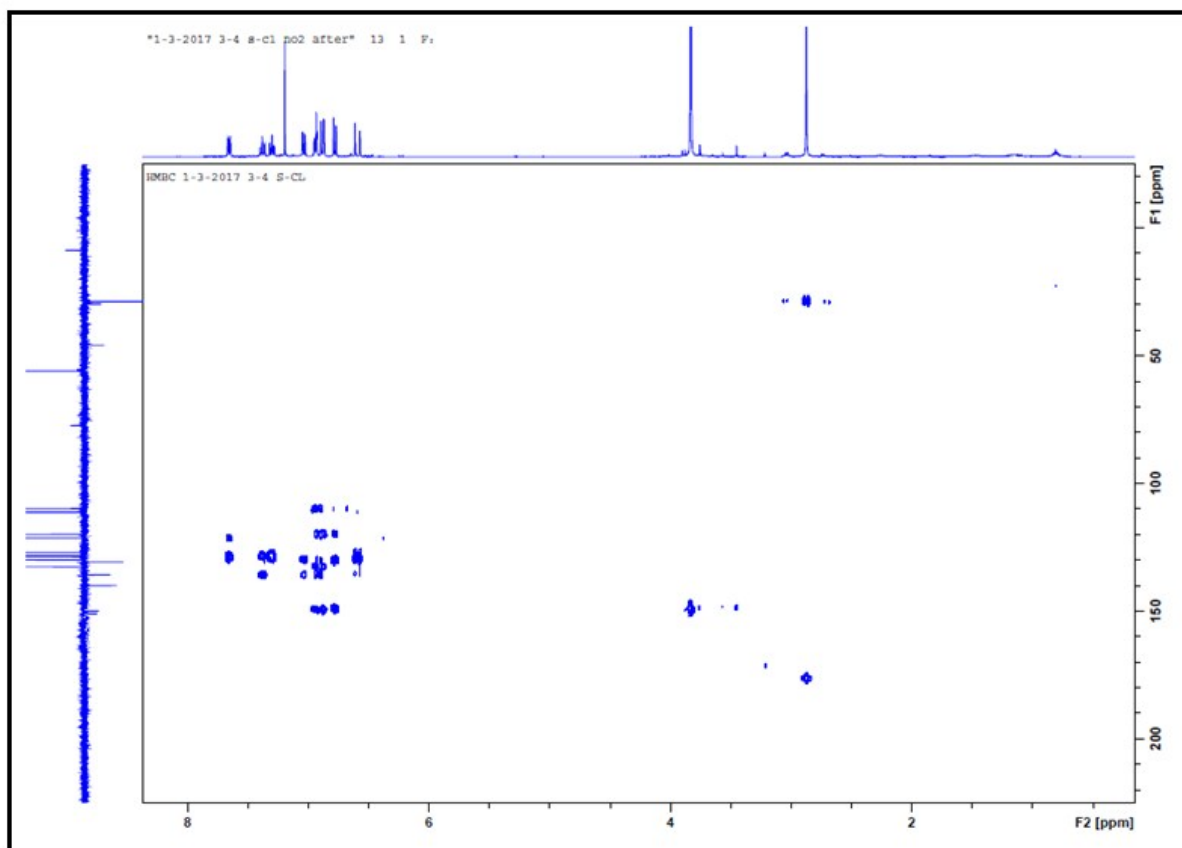

2

3

4

5

6

7

Figure S36: C HMBC GP  $\{^1\text{H}-^{13}\text{C}\}$ ( $\text{CDCl}_3$ , 400MHz) spectrum of compound bis(2((E)-(3,4-dimethoxystyryl)phenyl)succinamide).

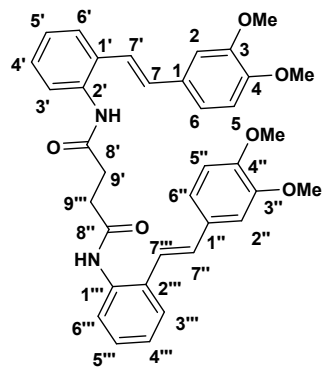

1

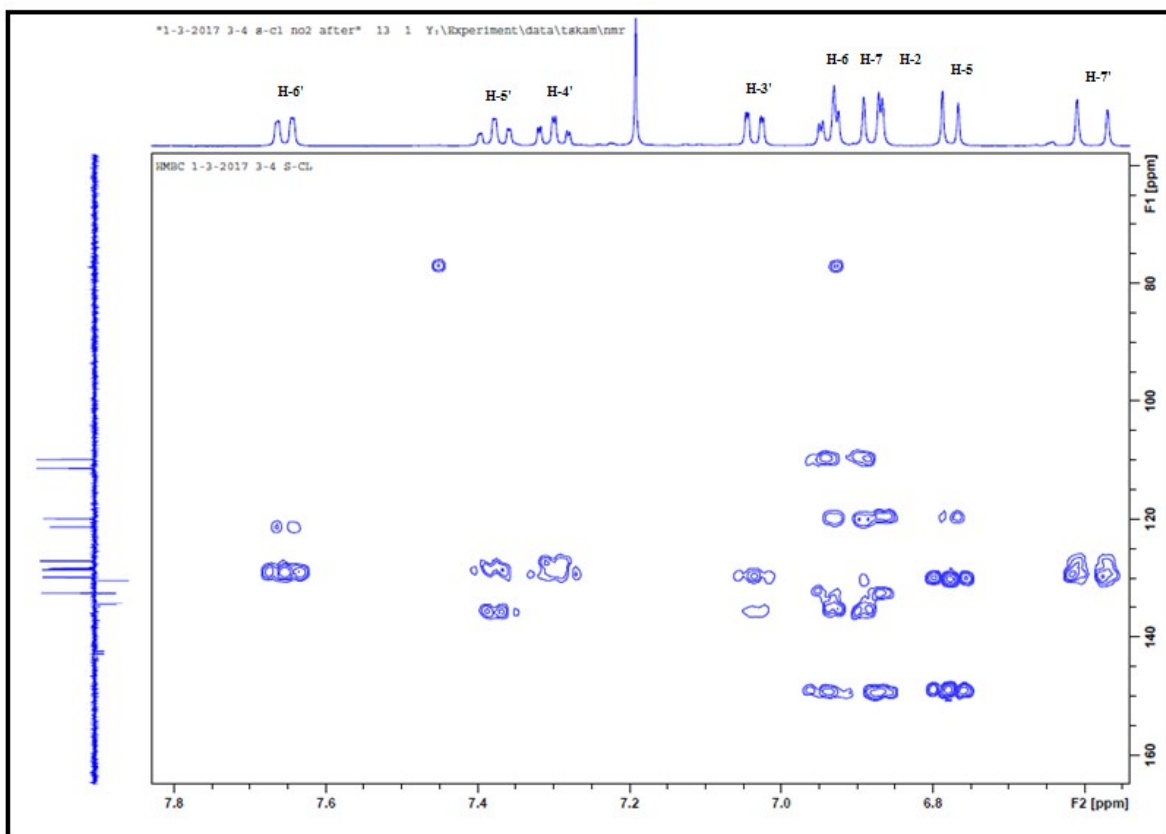

2

3

4

Figure S37: C HMBC GP  $\{^1\text{H}-^{13}\text{C}\}$ ( $\text{CDCl}_3$ , 400MHz) spectrum of compound bis(2((E)-(3,4-dimethoxystyryl)phenyl)succinamide (EXPANSION).

5

6

7

8

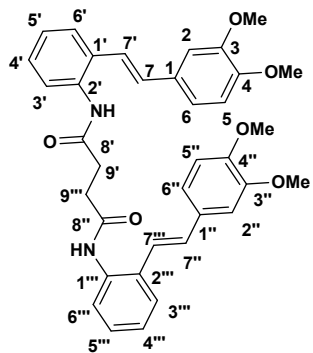

1

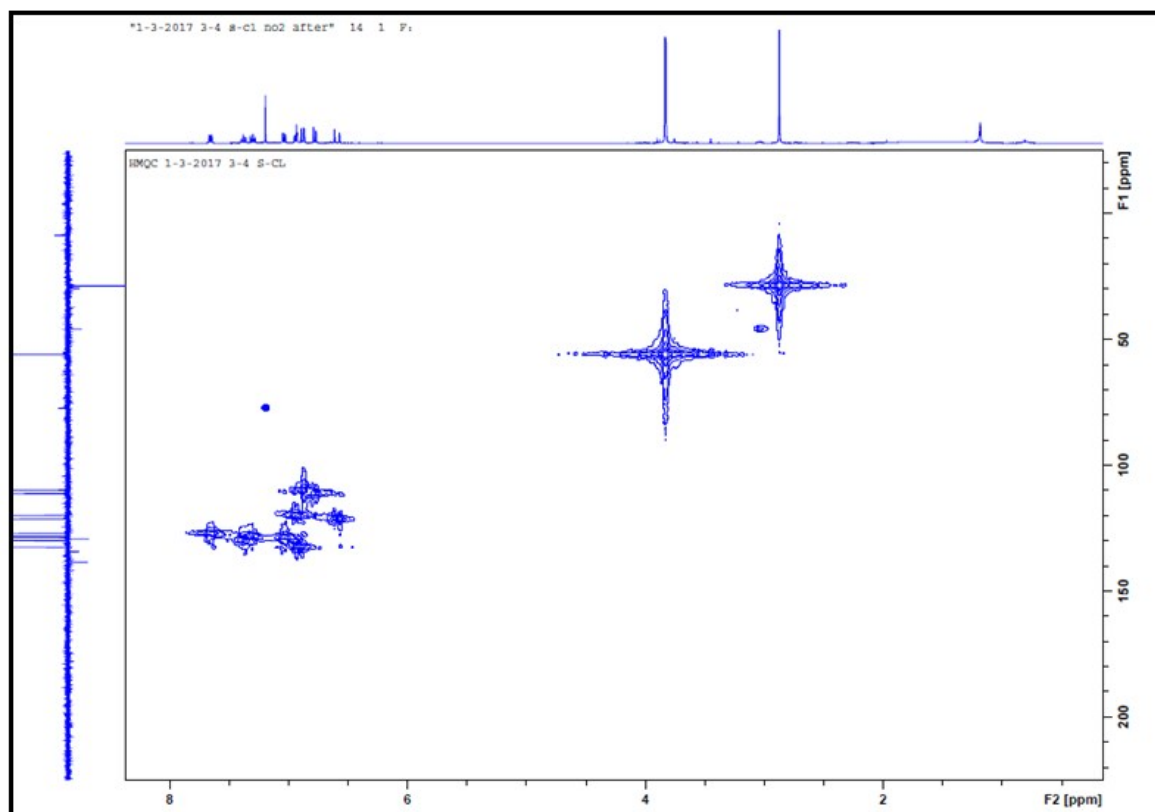

Figure S38:  $^{13}\text{C}$  HMQC GP  $\{^1\text{H}-^{13}\text{C}\}$ ( $\text{CDCl}_3$ , 400MHz) spectrum of compound bis(2((E)-(3,4-dimethoxystyryl)phenyl)succinamide).

2  
3  
4  
5  
6  
7

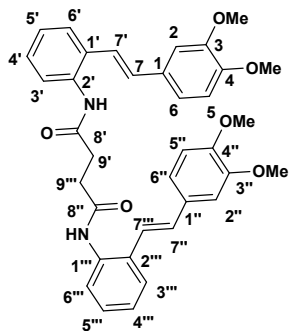

1

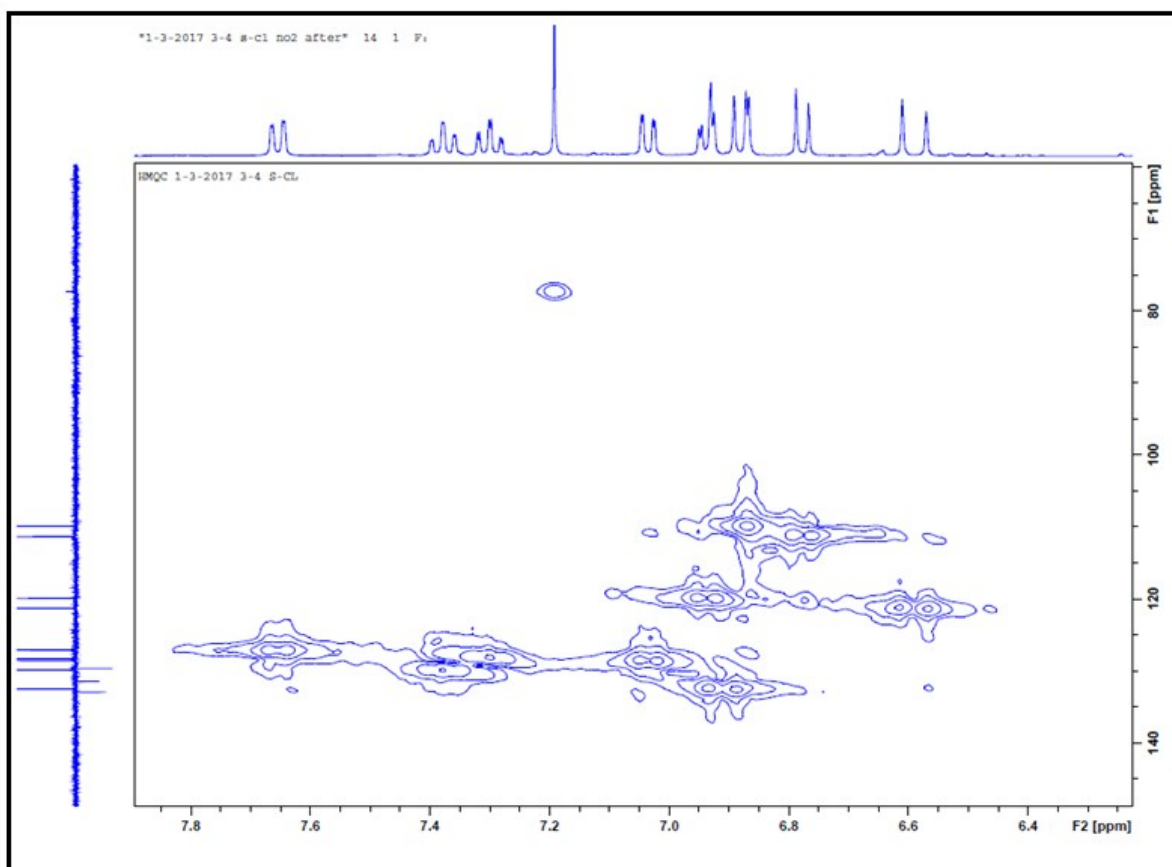

Figure S39: C HMQC GP  $\{^1\text{H}-^{13}\text{C}\}$ ( $\text{CDCl}_3$ , 400MHz) spectrum of compound bis(2((E)-(3,4-dimethoxystyryl)phenyl)succinamide) (EXPANSION).

2

3

4

5

6

7

8

9



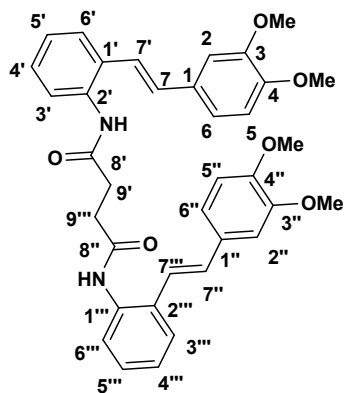

1

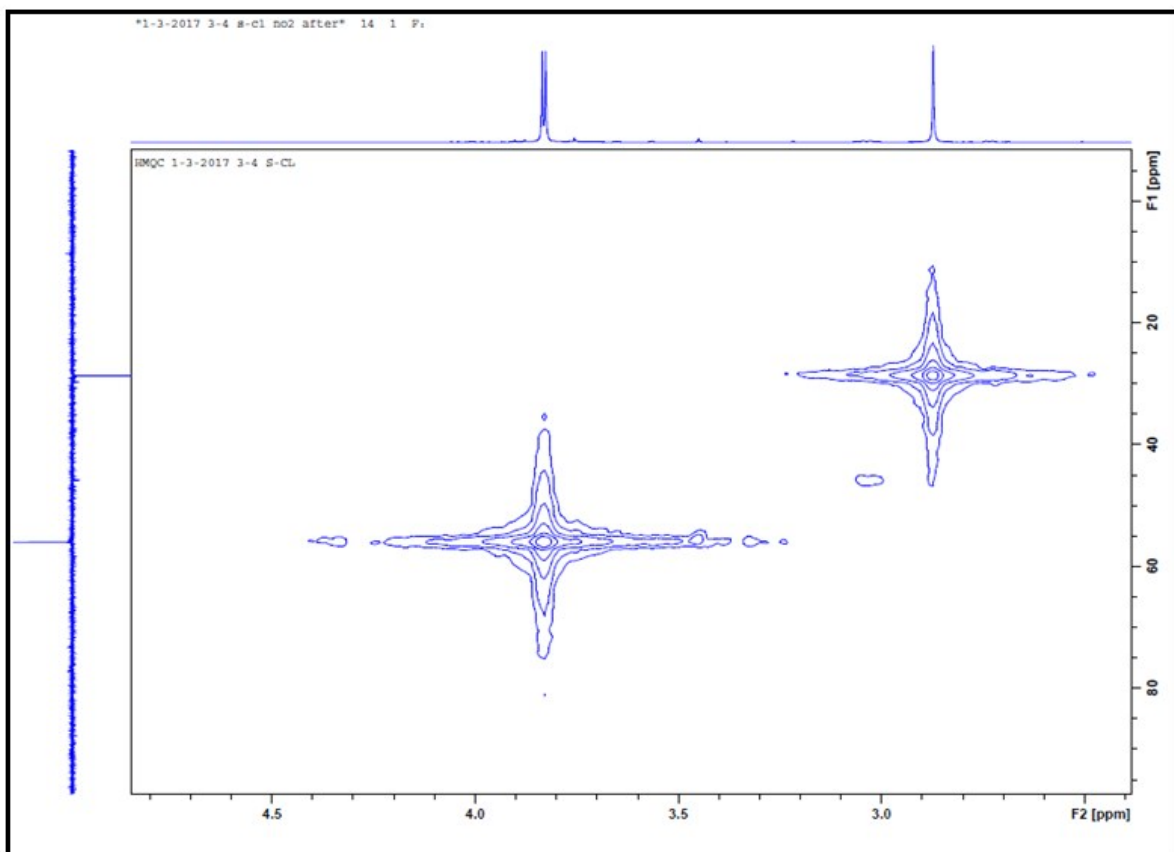

Figure S40: C HMQC GP  $\{^1\text{H}-^{13}\text{C}\}$ ( $\text{CDCl}_3$ , 400MHz) spectrum of compound bis(2((E)-(3,4-dimethoxystyryl)phenyl)succinamide (EXPANSION).

2  
3  
4  
5  
6  
7

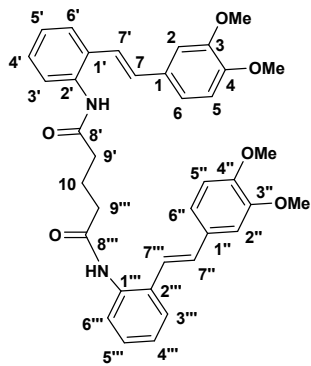

1

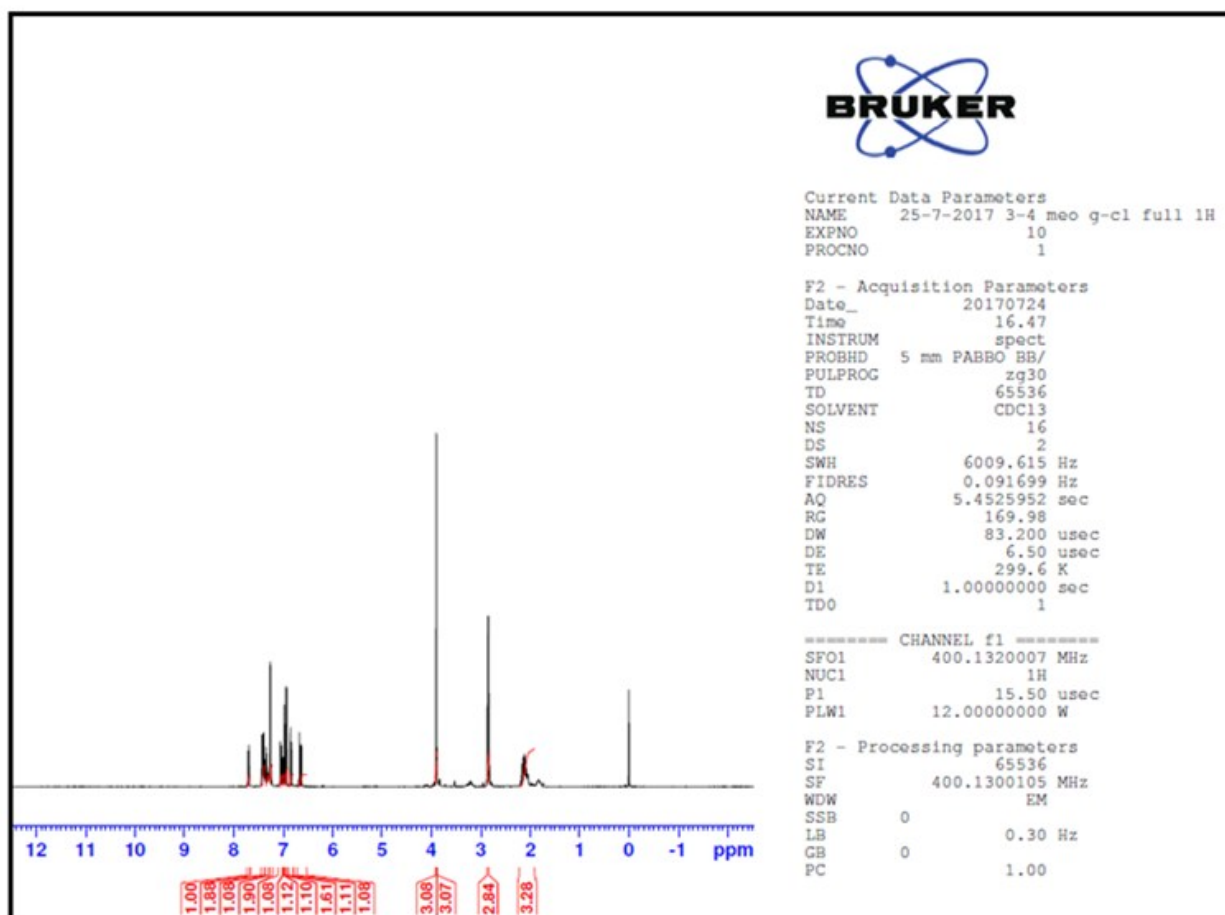

2

3

Figure S41: <sup>1</sup>H NMR (CDCl<sub>3</sub>, 400MHz) spectrum of compound bis(2((E)-(3,4-dimethoxystyryl)phenyl) glutaramide).

4

5

6

7

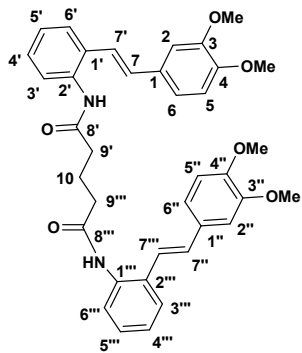

1

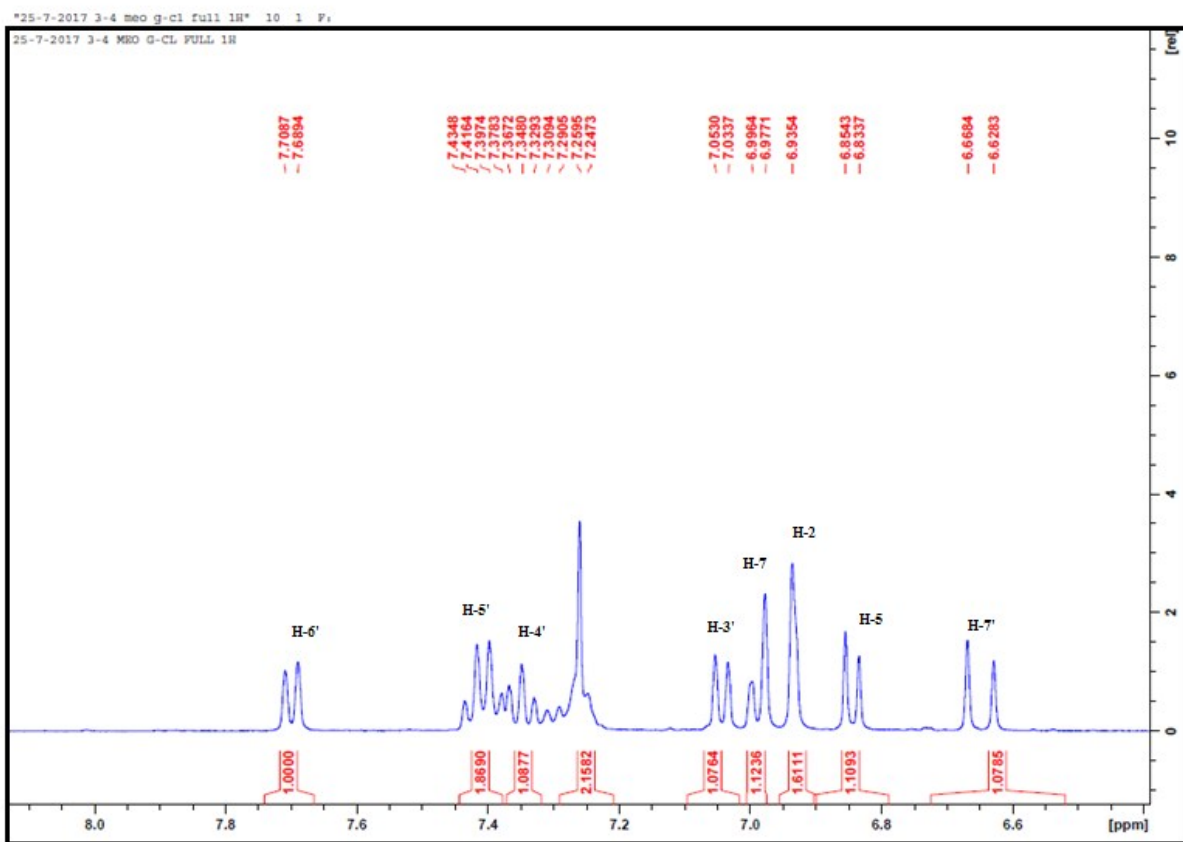

2

3

Figure S42: <sup>1</sup>H NMR (CDCl<sub>3</sub>, 400MHz) spectrum of compound bis(2((E)-(3,4-dimethoxystyryl)phenyl) glutaramide (EXPANSION).

4

5

6

7

8

9

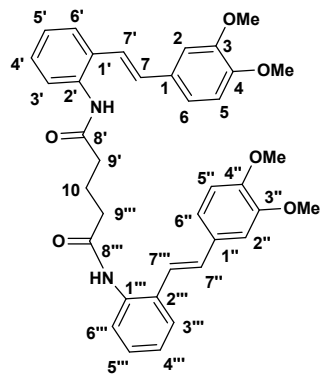

1

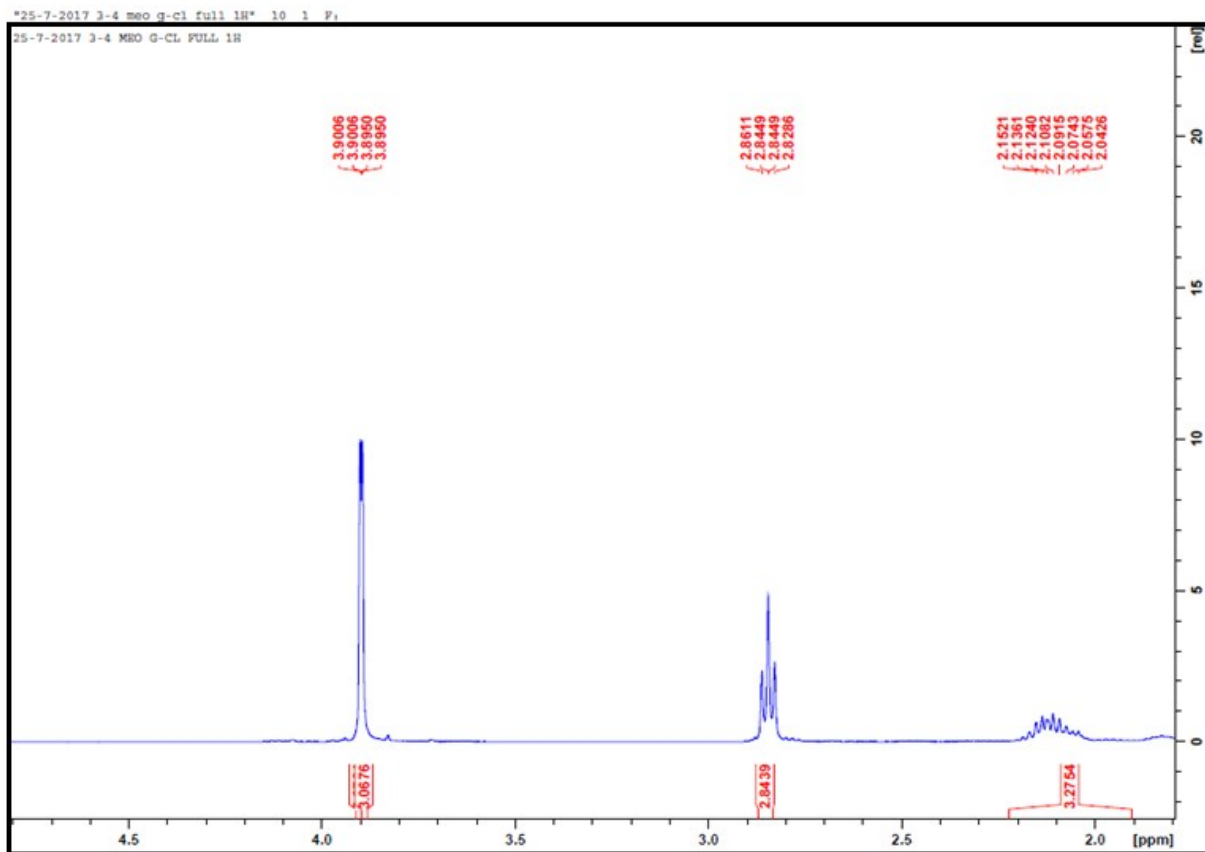

2

3

Figure S43:  $^1\text{H}$  NMR ( $\text{CDCl}_3$ , 400MHz) spectrum of compound bis(2((E)-(3,4-dimethoxystyryl)phenyl) glutaramide (EXPANSION).

4

5

6

7

8

1

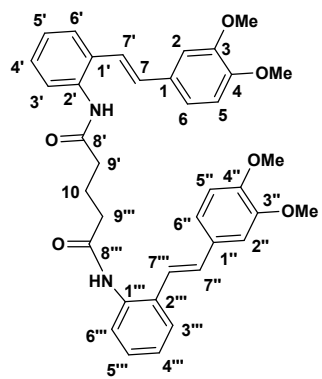

2

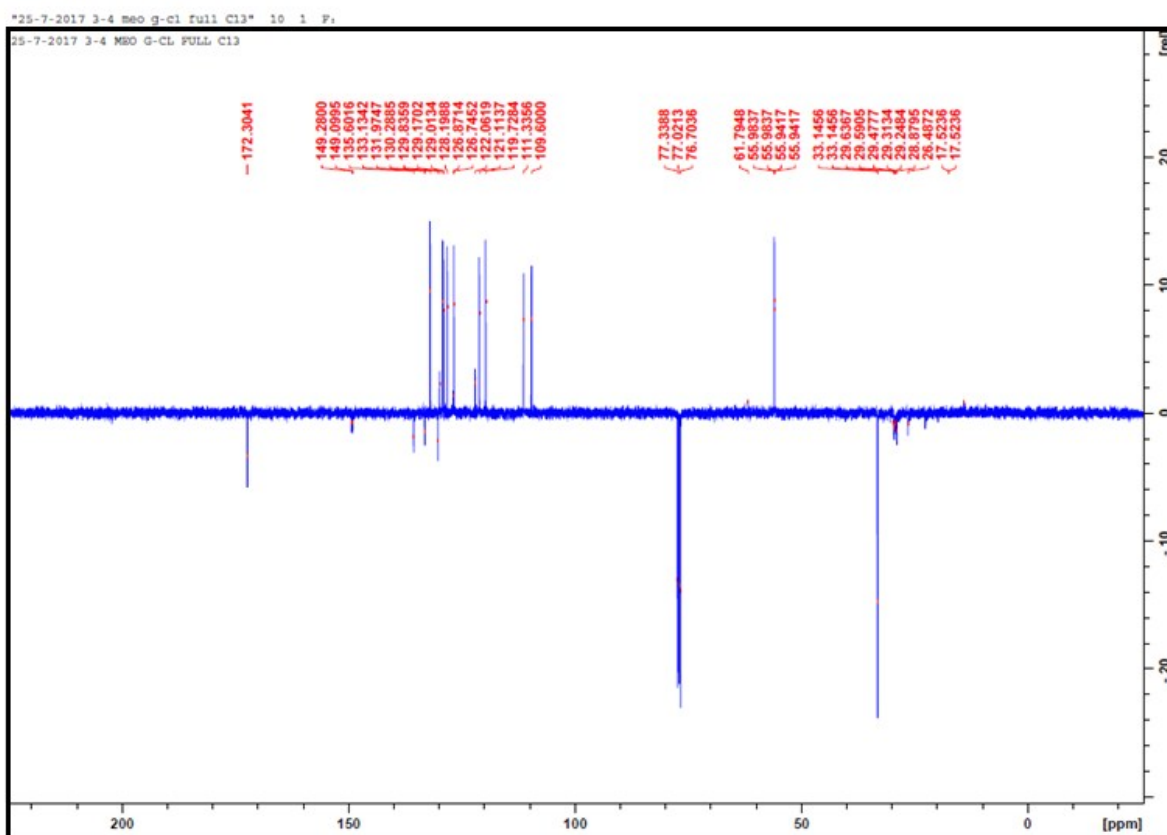

3

4

Figure S44:  $^{13}\text{C}$  DEPT135,  $\text{CH}_3/\text{CH}$  po  $\{^1\text{H}\}$  ( $\text{CDCl}_3$ , 400MHz) spectrum of compound bis(2((E)-(3,4-dimethoxyphenyl)vinyl)phenyl) glutaramide.

5

6

7

8

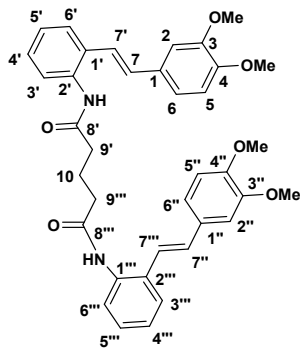

1

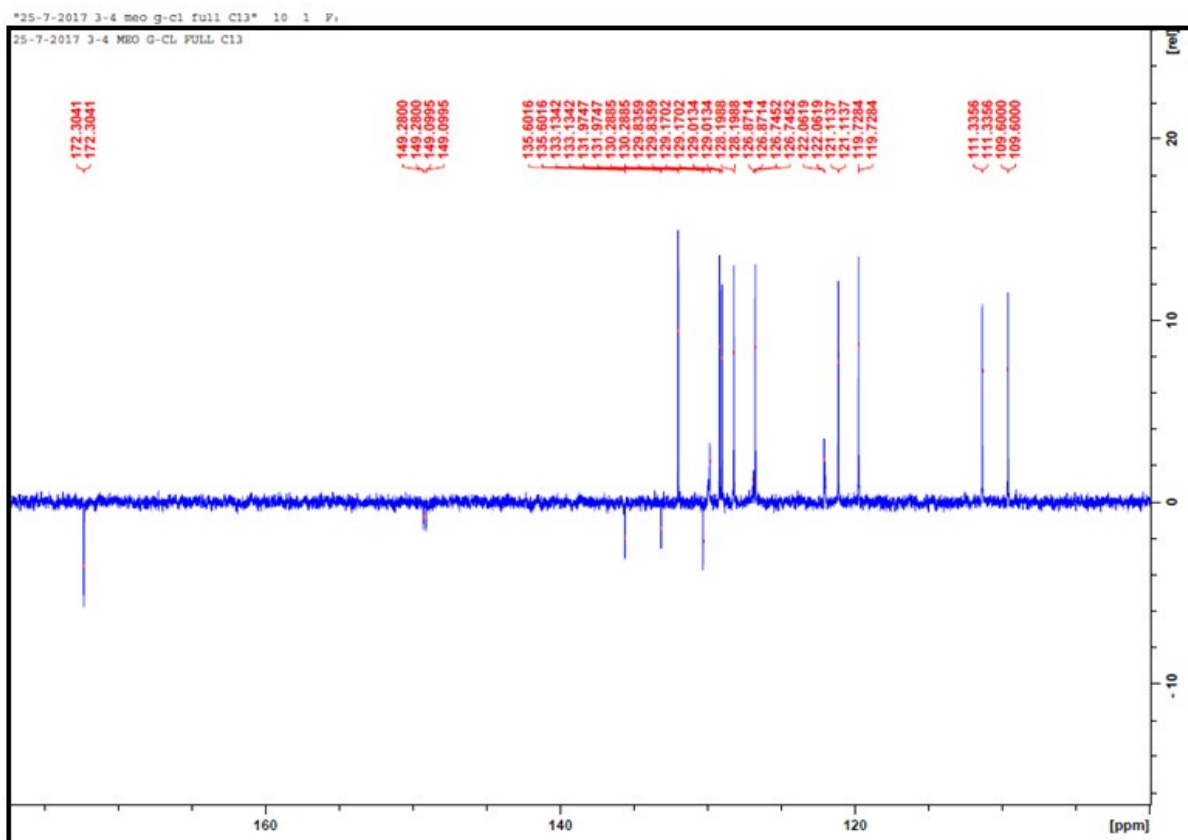

Figure S45:  $^{13}\text{C}$  DEPT135,  $\text{CH}_3/\text{CH}$  po  $\{^1\text{H}\}$  ( $\text{CDCl}_3$ , 400MHz) spectrum of compound bis(2((E)-(3,4-dimethoxystyryl)phenyl)glutaramide) (EXPANSION).

2  
3  
4  
5  
6  
7  
8  
9

1

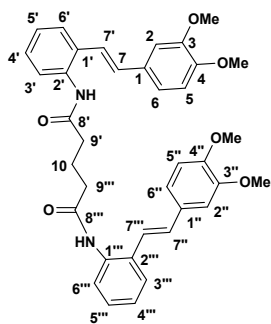

2

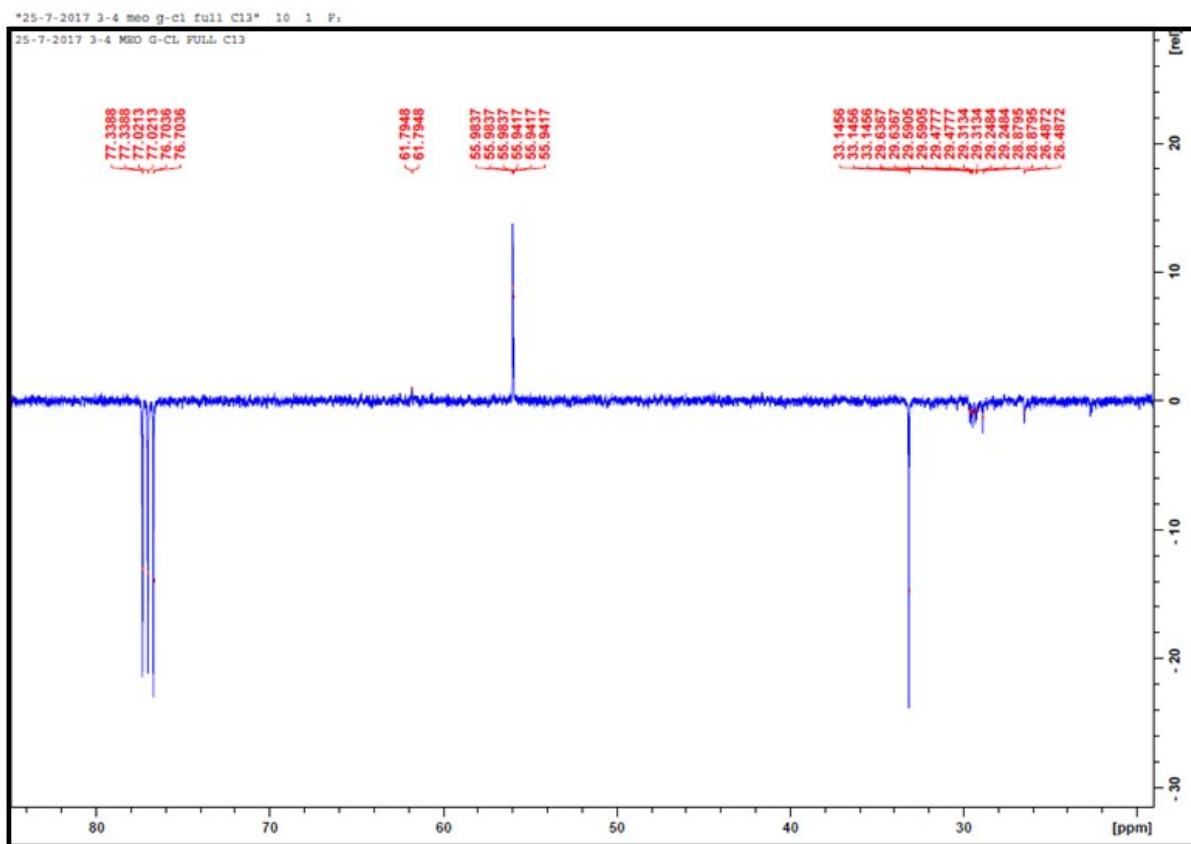

3

4

5

Figure S46:  $^{13}\text{C}$  DEPT135,  $\text{CH}_3/\text{CH}$  po  $\{^1\text{H}\}$  ( $\text{CDCl}_3$ , 400MHz) spectrum of compound bis(2((E)-(3,4-dimethoxystyryl)phenyl) glutaramide (EXPANSION).

6

7

8

9

1

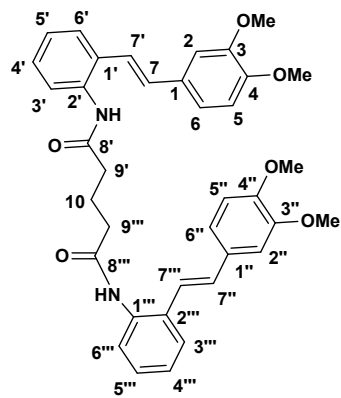

2

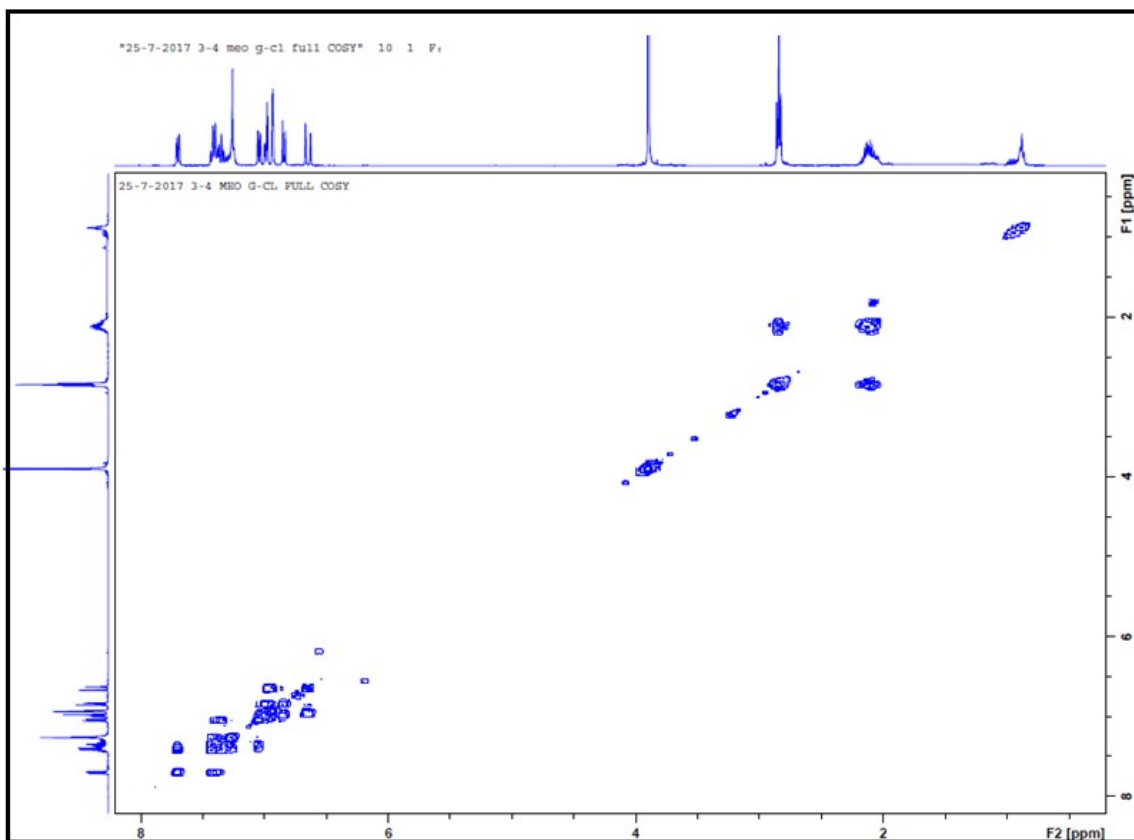

3

4

5

Figure S47: C COSY GPSW <sup>1</sup>H(CDCl<sub>3</sub>, 400MHz) spectrum of compound bis(2((E)-(3,4-dimethoxystyryl)phenyl) glutaramide.

6

7

8



1

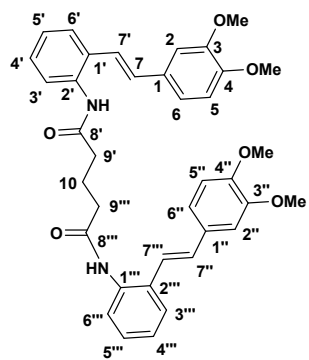

2

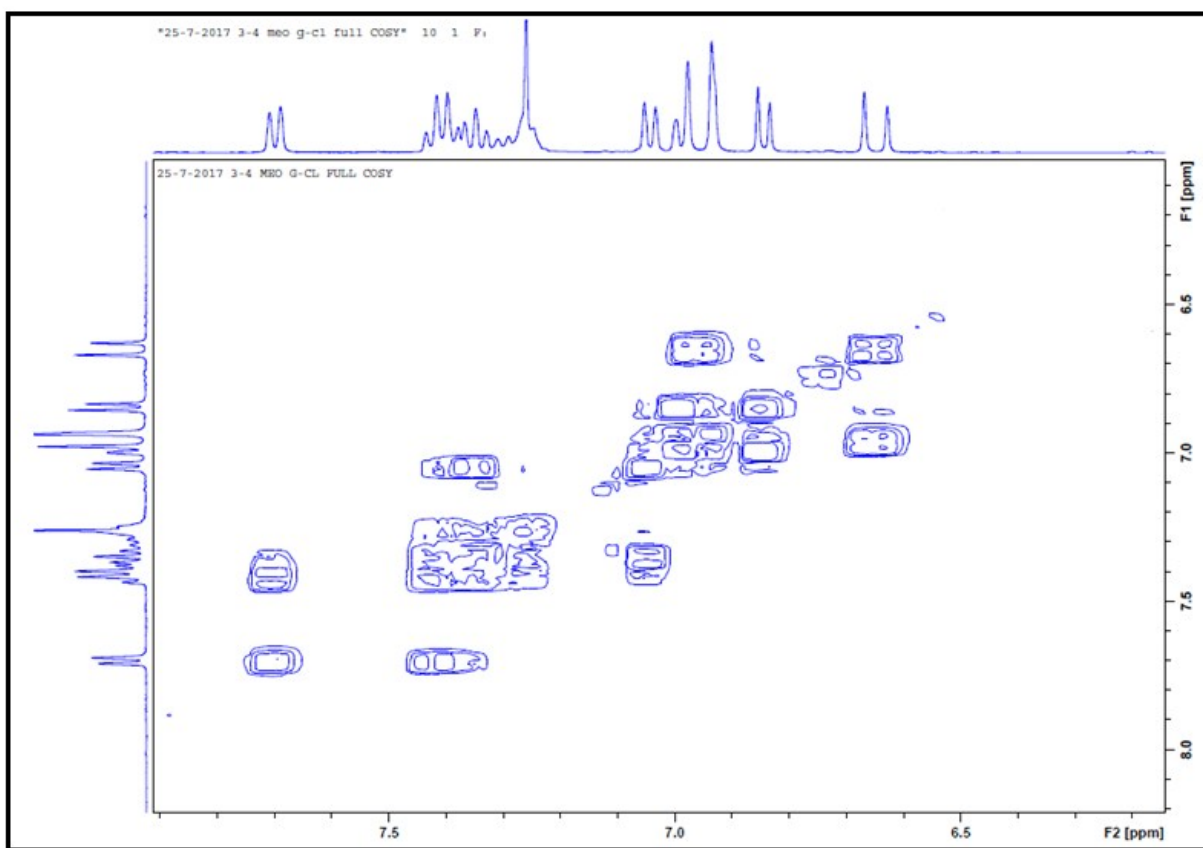

3

4

Figure S48: <sup>1</sup>H COSY GPSW {<sup>1</sup>H}(CDCl<sub>3</sub>, 400MHz) spectrum of compound bis(2((E)-(3,4-dimethoxystyryl)phenyl)glutaramide) (EXPANSION).

5

6

7

8

9

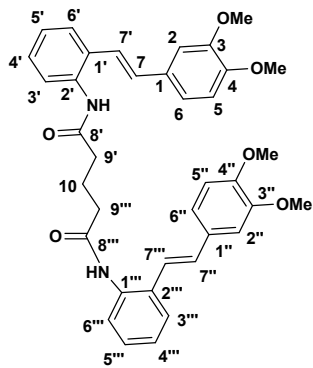

1

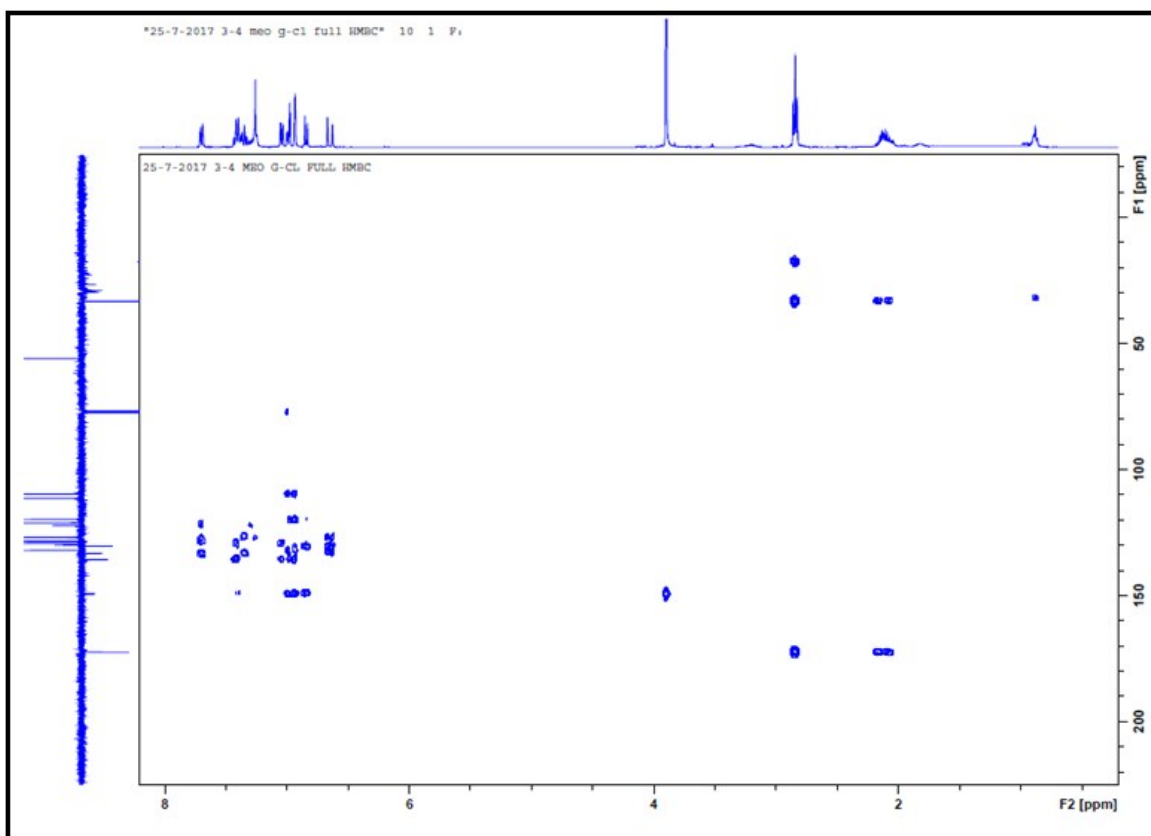

2

3

Figure S49: C HMBC GP  $\{^1\text{H}-^{13}\text{C}\}$ ( $\text{CDCl}_3$ , 400MHz) spectrum of compound bis(2((E)-(3,4-dimethoxystyryl)phenyl) glutaramide.

4

5

6

7

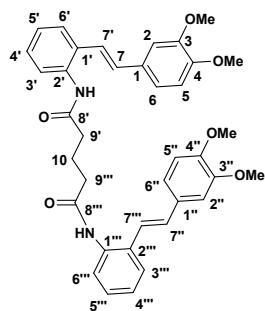

1

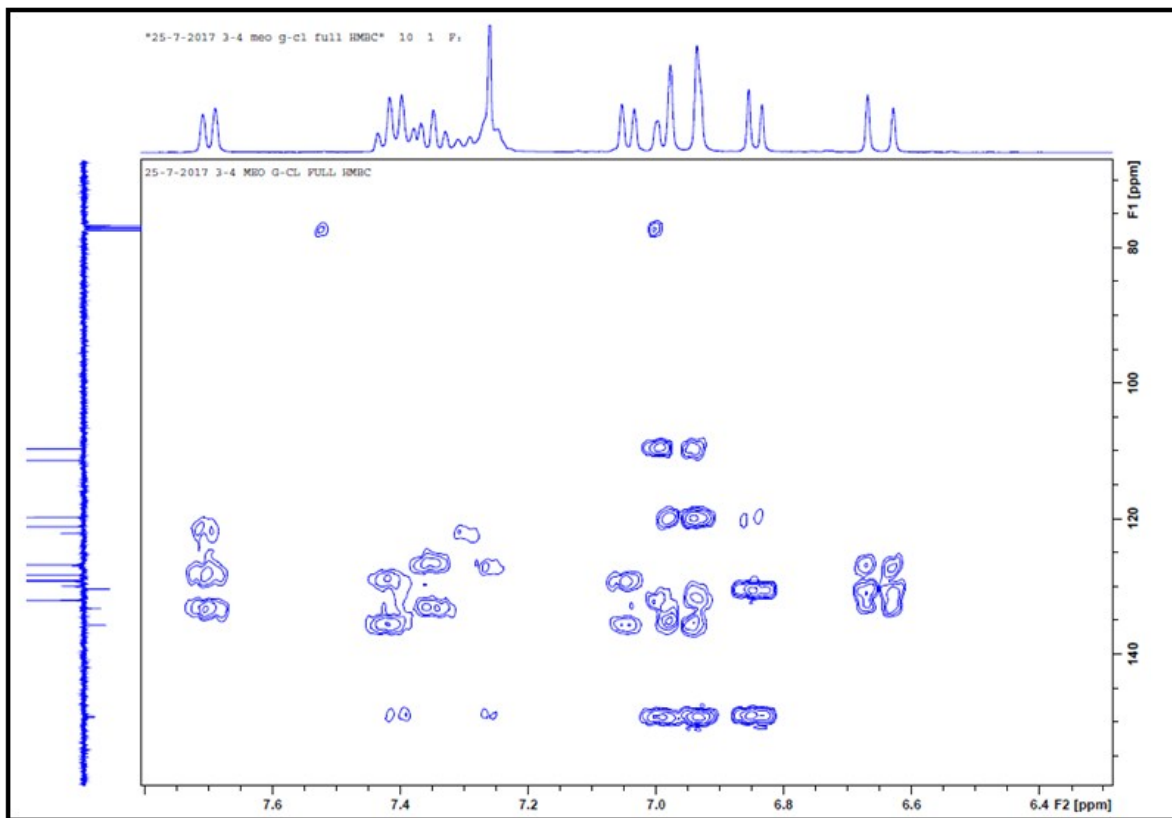

2

3 **Figure S50: C HMBC GP  $\{^1\text{H}-^{13}\text{C}\}$ ( $\text{CDCl}_3$ , 400MHz) spectrum of compound bis(2((E)-(3,4-dimethoxystyryl)phenyl)**  
 4 **glutaramide (EXPANSION).**

5

6

7

8

9

10

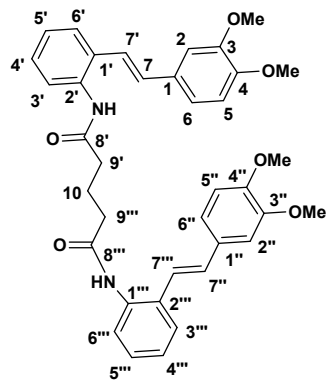

1

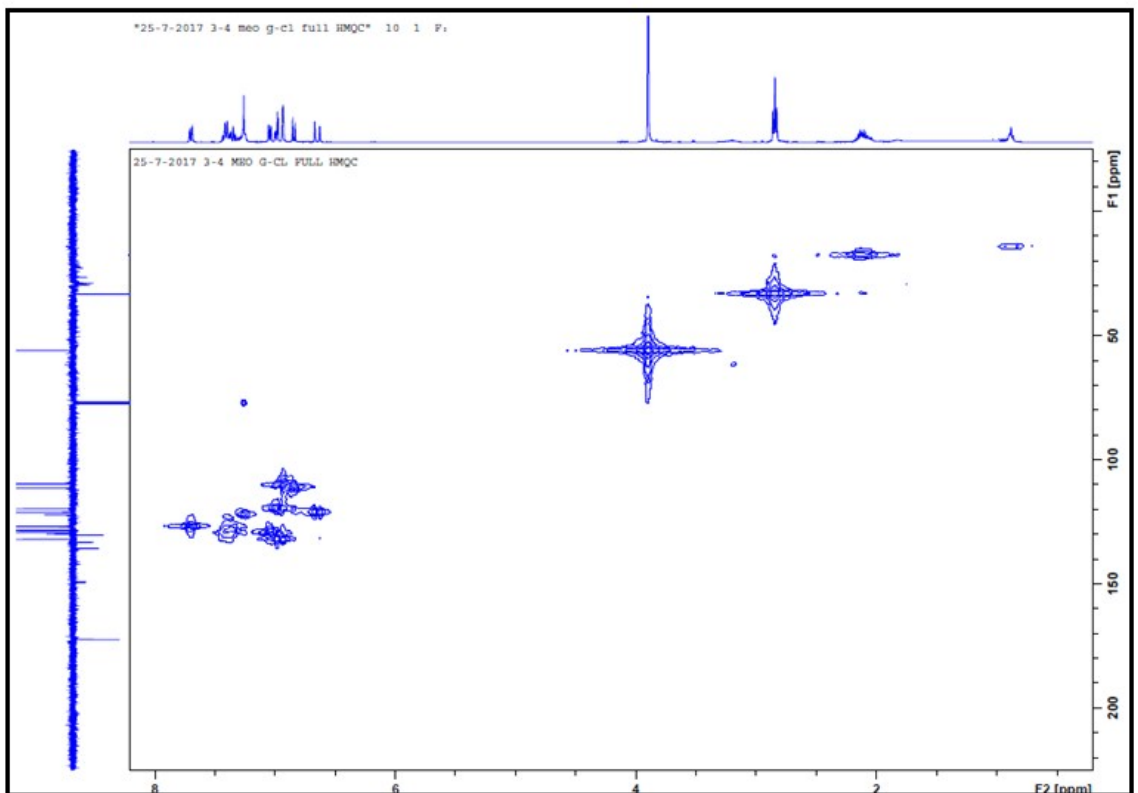

2

3

Figure S51:  $^1\text{H}$ - $^{13}\text{C}$  HMQC NMR spectrum of compound bis(2((E)-(3,4-dimethoxystyryl)phenyl)glutaramide.

4

5

6

7

8

9

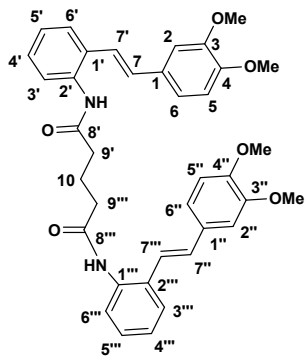

1

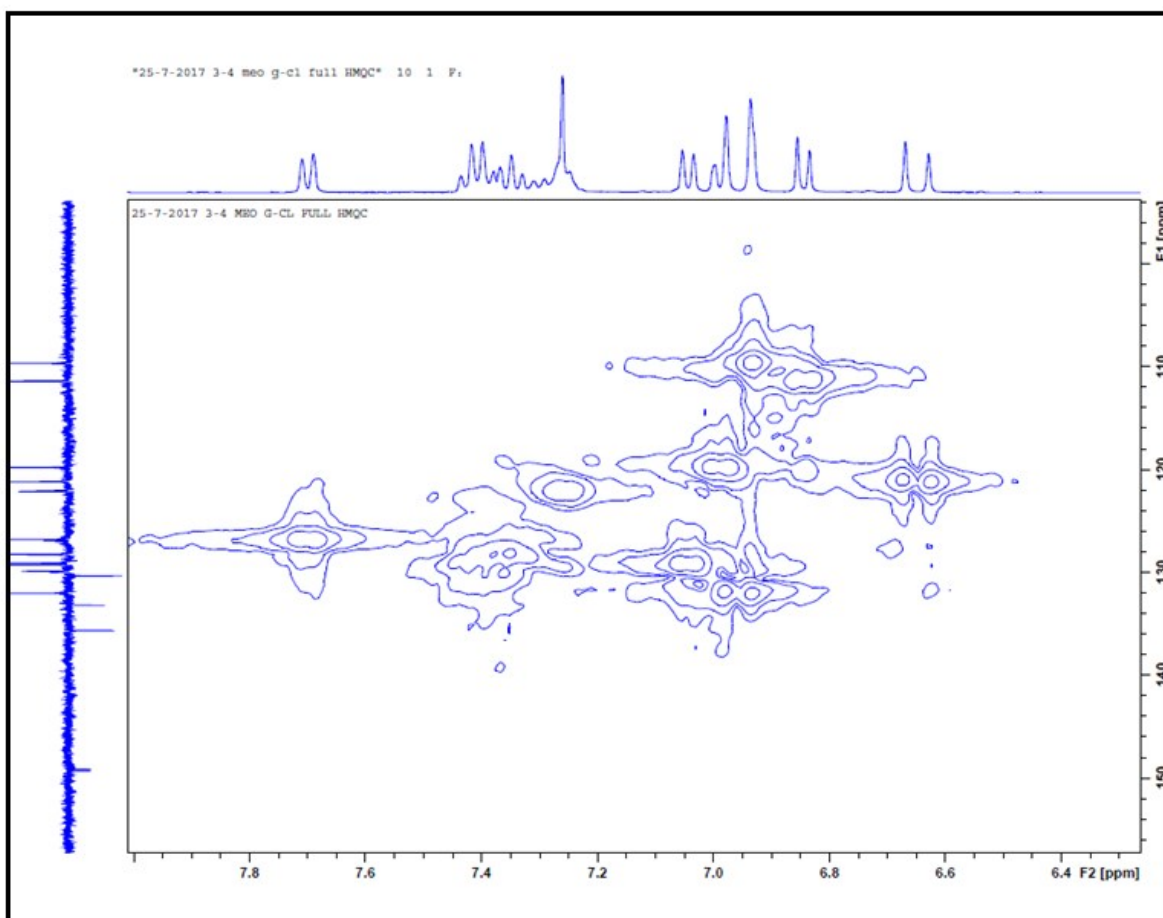

Figure S52:  $^1\text{H}$ - $^{13}\text{C}$  HMQC GP  $\{^1\text{H}$ - $^{13}\text{C}\}$ ( $\text{CDCl}_3$ , 400MHz) spectrum of compound bis(2((E)-(3,4-dimethoxystyryl)phenyl)glutaramide (EXPANSION).

2  
3  
4

5

6

7

8

1

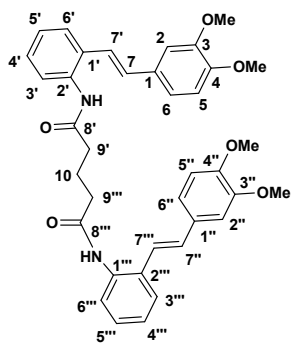

2

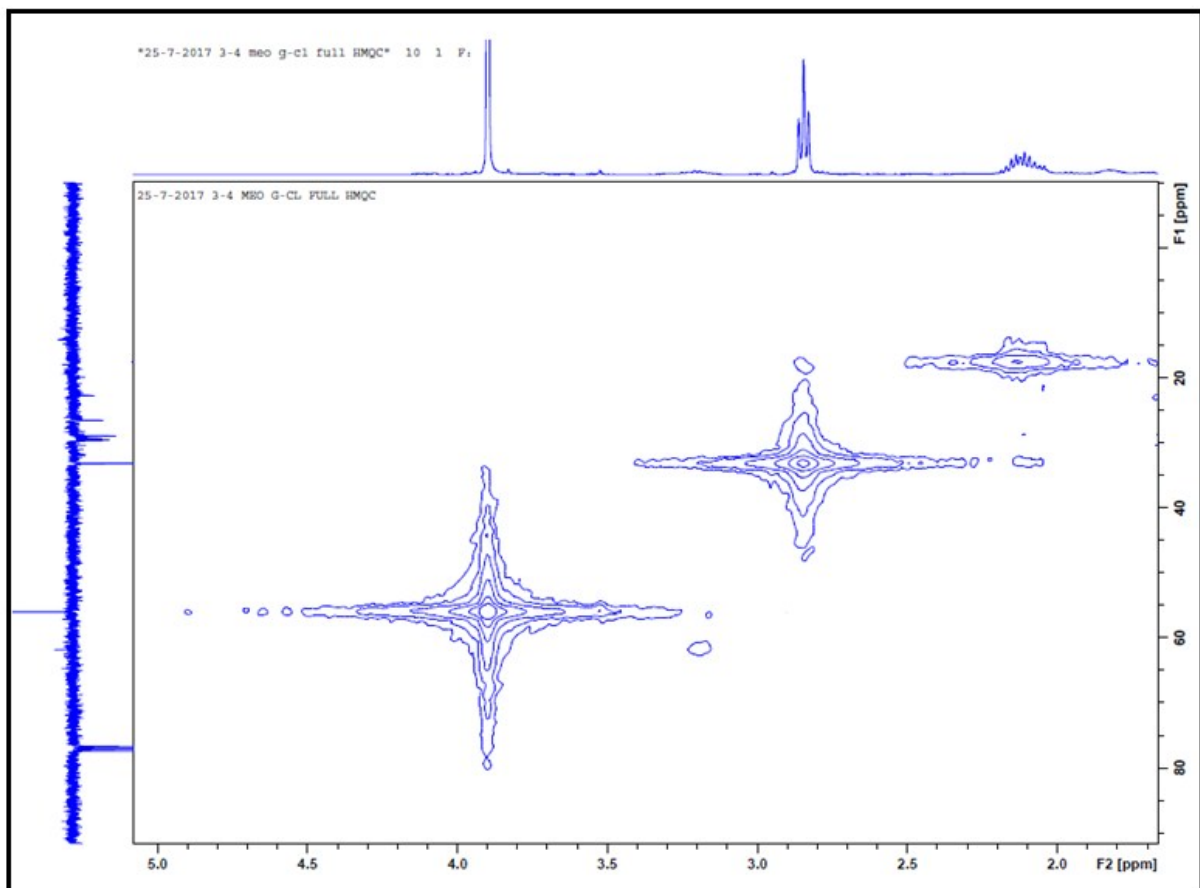

3

4 **Figure S53: C HMQC GP <sup>1</sup>H-<sup>13</sup>C}(CDCl<sub>3</sub>, 400MHz) spectrum of compound bis(2((E)-(3,4-dimethoxystyryl)phenyl)**  
5 **glutaramide (EXPANSION).**

6

7

8

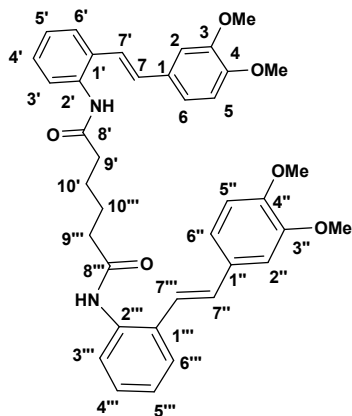

1

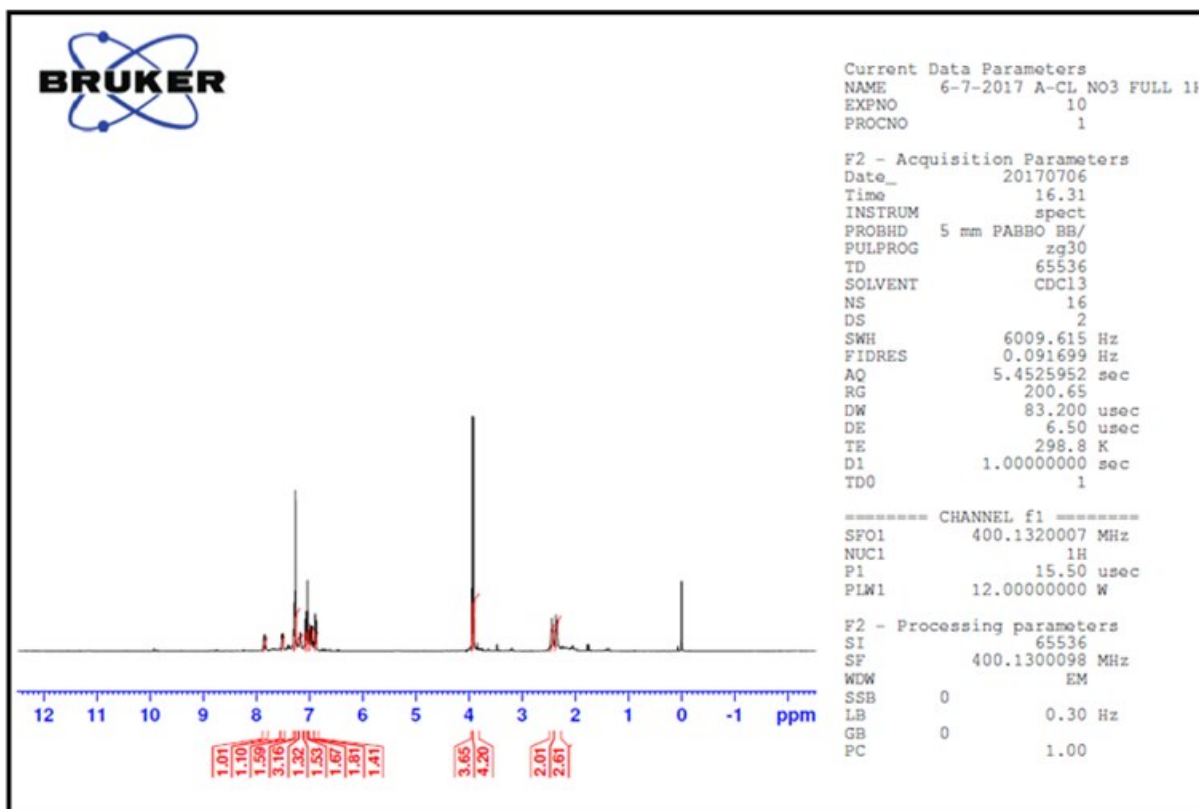

2  
3

Figure S54: <sup>1</sup>H NMR (CDCl<sub>3</sub>, 400MHz) spectrum of compound bis(2((E)-(3,4-dimethoxystyryl)phenyl)adipamide).

4

5

6

7

8

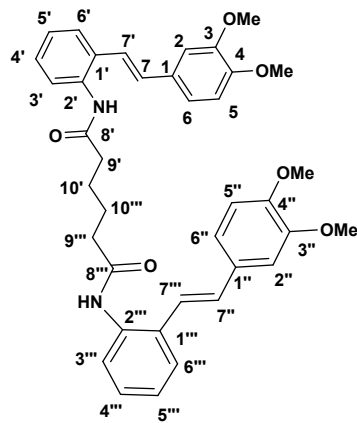

1

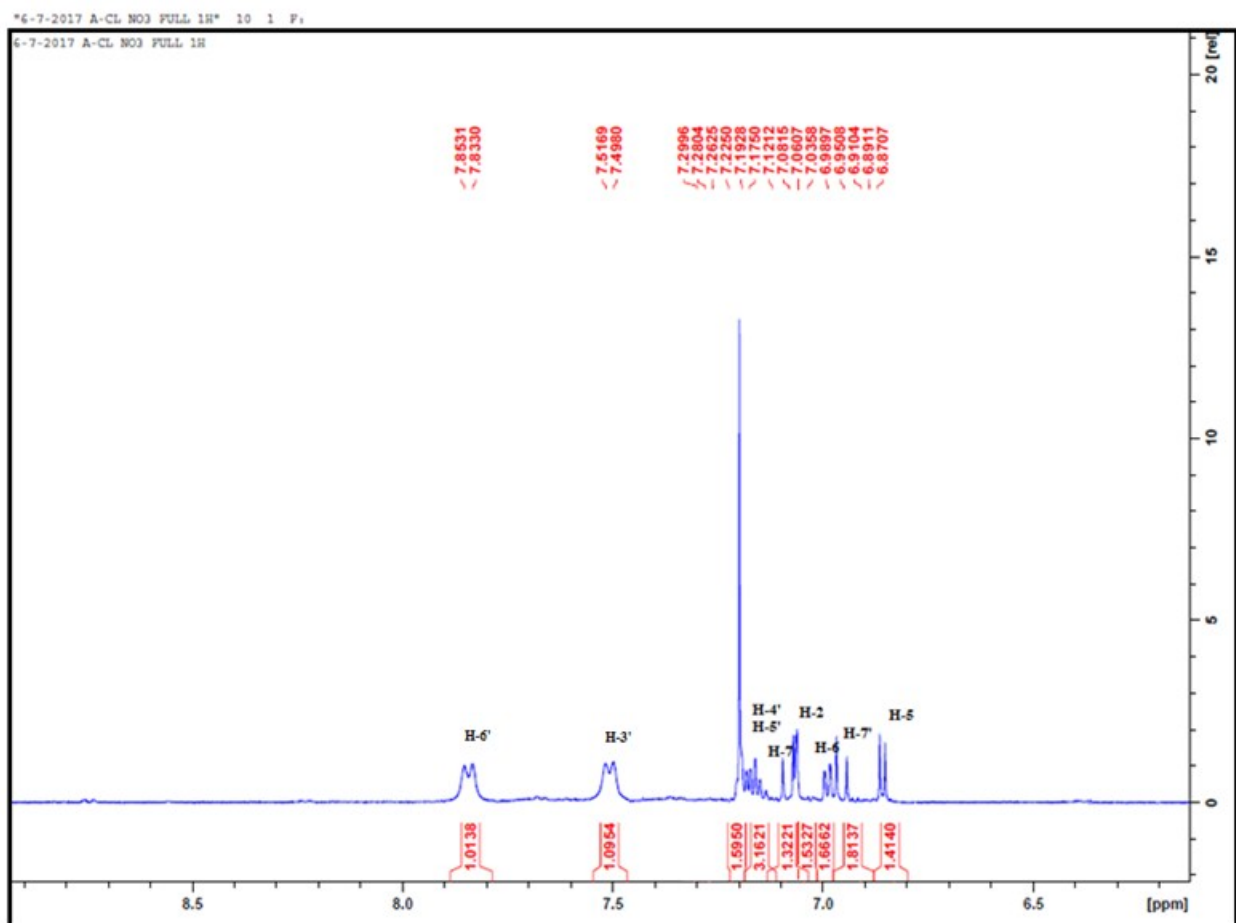

2

3

Figure S55: <sup>1</sup>H NMR (CDCl<sub>3</sub>, 400MHz) spectrum of compound bis(2((E)-(3,4-dimethoxystyryl)phenyl)adipamide

4

5

6



1

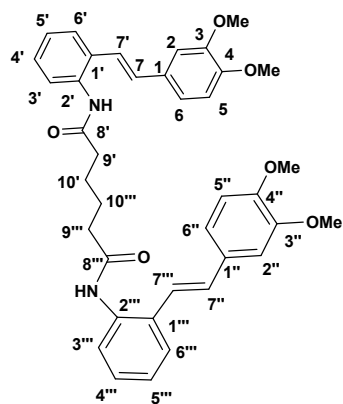

2

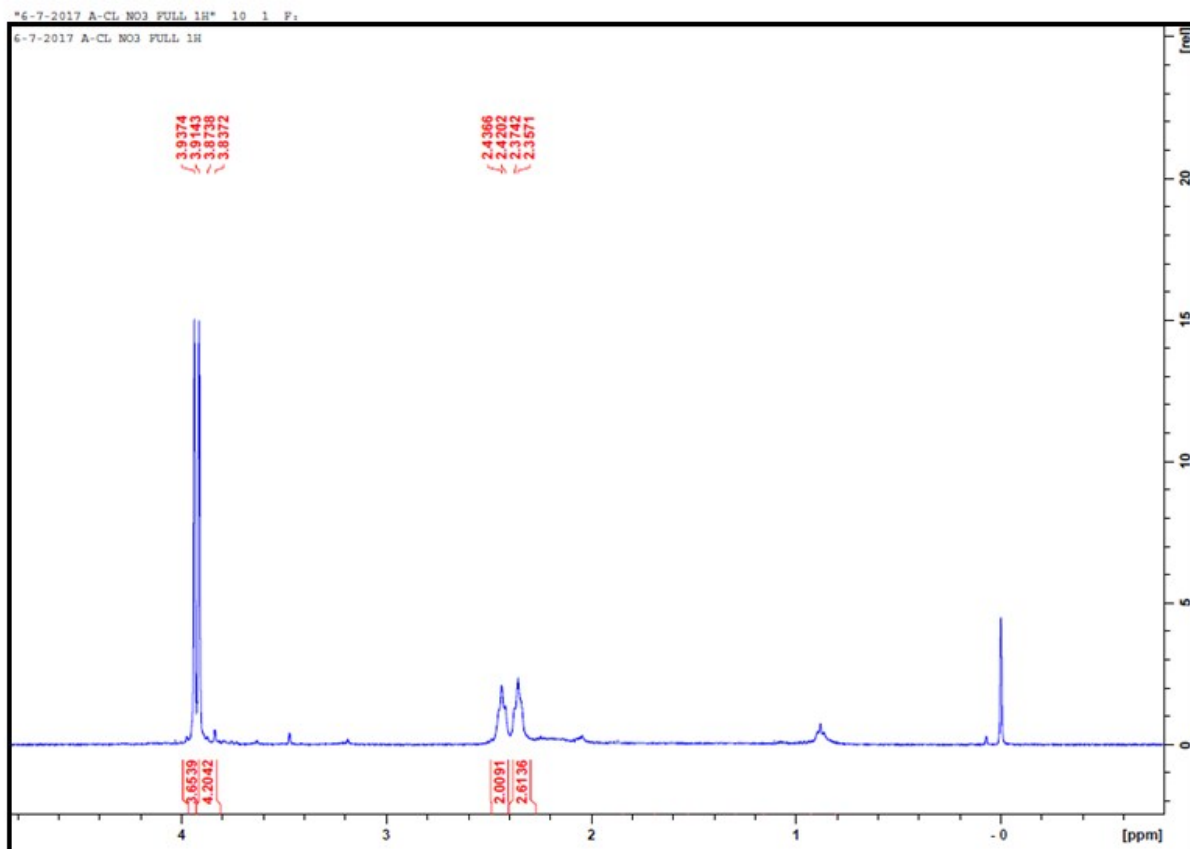

3

4

5

Figure S56: <sup>1</sup>H NMR (CDCl<sub>3</sub>, 400MHz) spectrum of compound bis(2((E)-(3,4-dimethoxystyryl)phenyl)adipamide (EXPANSION).

6

7

8

1

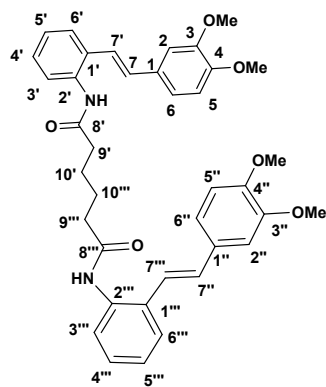

2

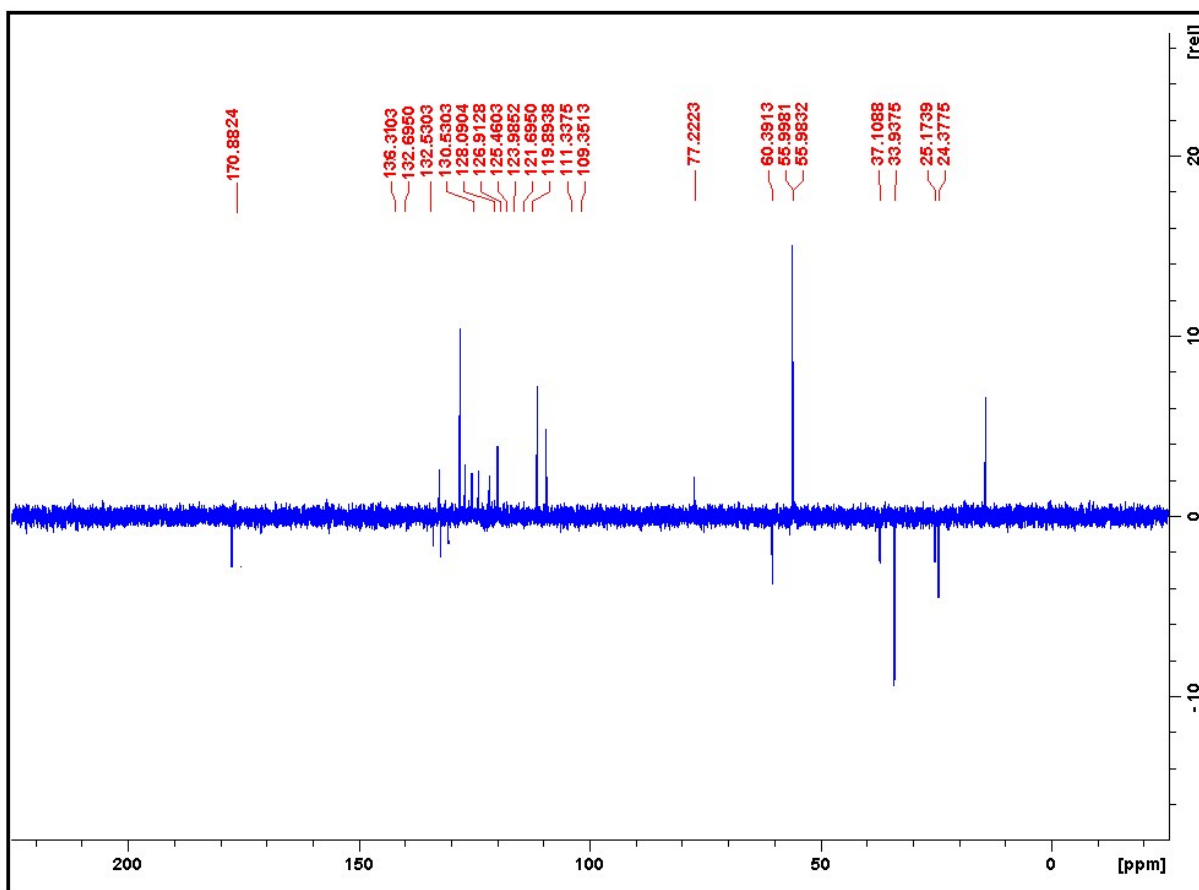

3

4

5

Figure S57:  $^{13}\text{C}$  DEPT135,  $\text{CH}_3/\text{CH}$  po  $\{^1\text{H}\}$  ( $\text{CDCl}_3$ , 400MHz) spectrum of compound bis(2((E)-(3,4-dimethoxystyryl)phenyl)adipamide).

6

7

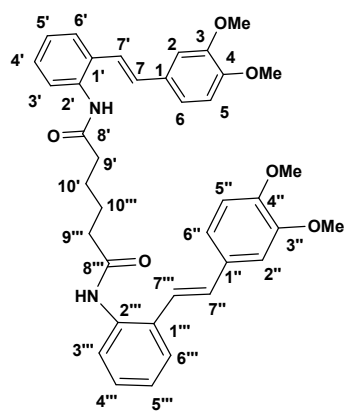

1

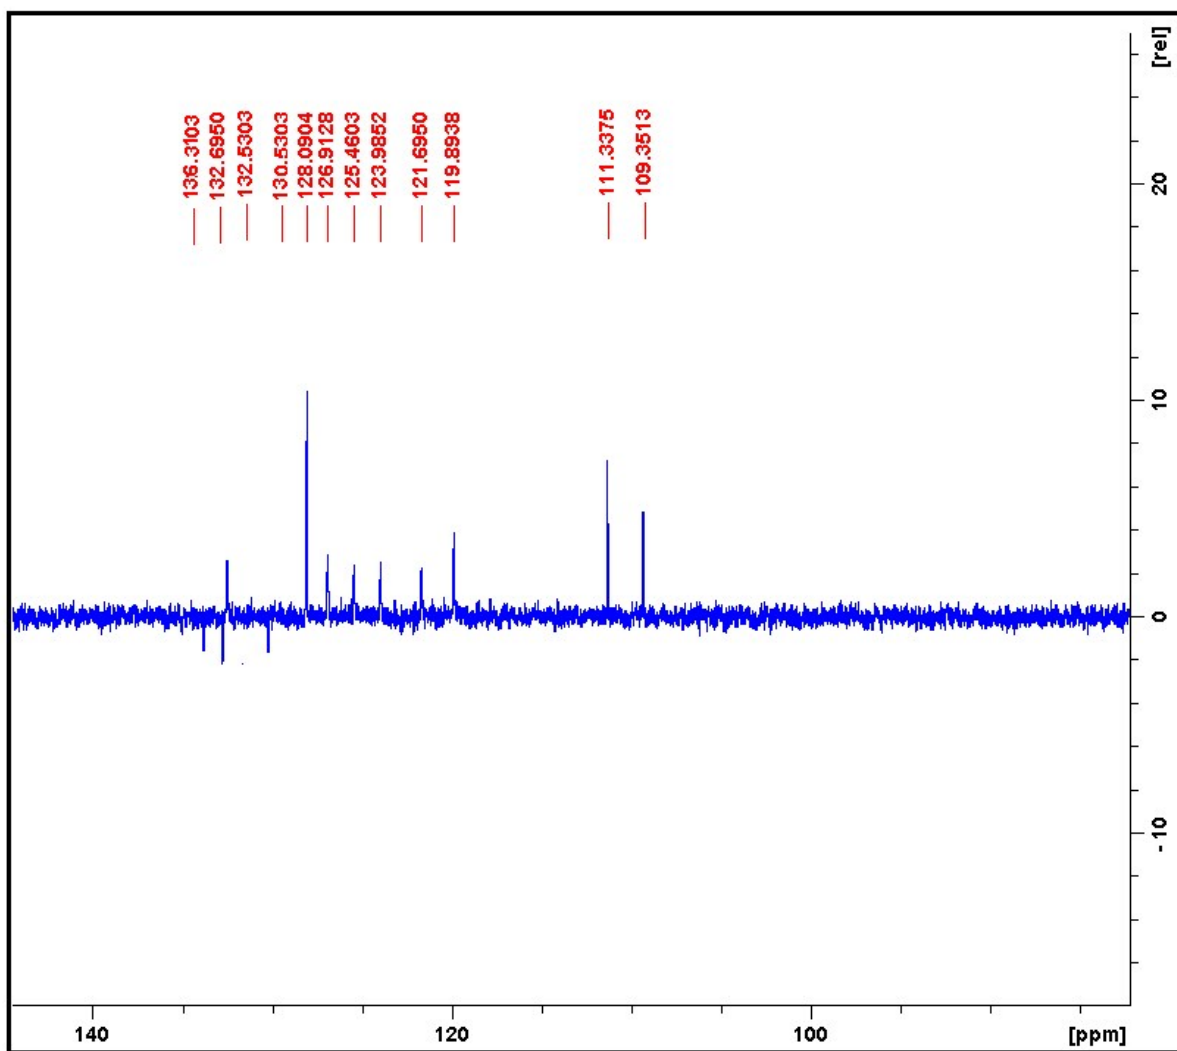

2

3

4

5

6

Figure S58:  $^{13}\text{C}$  DEPT135,  $\text{CH}_3/\text{CH}$  po  $\{^1\text{H}\}$  ( $\text{CDCl}_3$ , 400MHz) spectrum of compound bis(2((E)-(3,4-dimethoxystyryl)phenyl)adipamide) (EXPANSION).

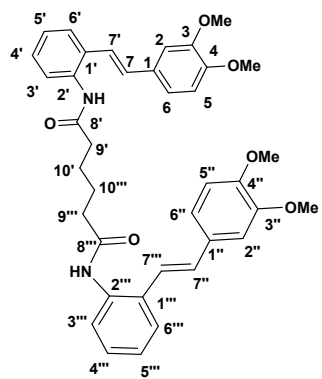

1

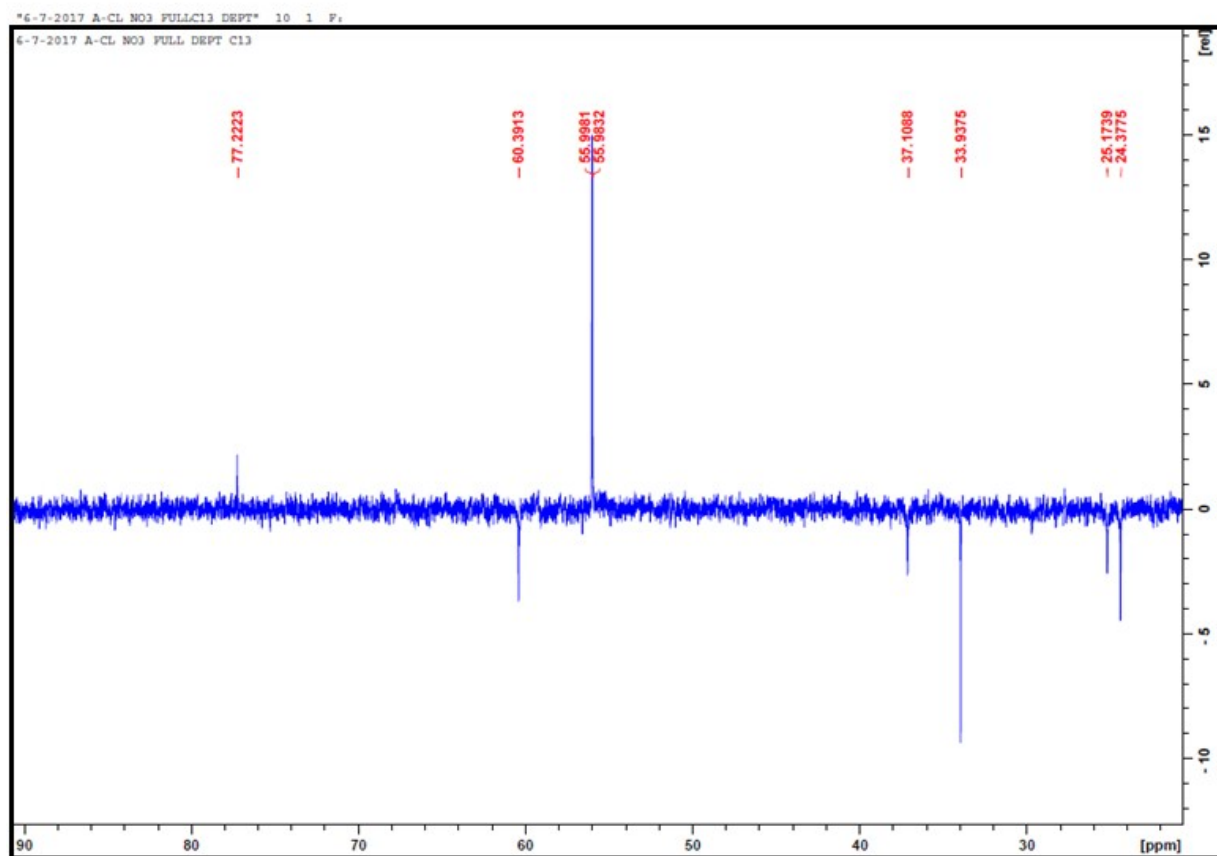

Figure S59: <sup>13</sup>C DEPT135, CH<sub>3</sub>/CH po {<sup>1</sup>H}(CDCl<sub>3</sub>, 400MHz) spectrum of compound bis(2((E)-(3,4-dimethoxystyryl)phenyl)adipamide (EXPANSION).

2

3

4

5

6

7

8

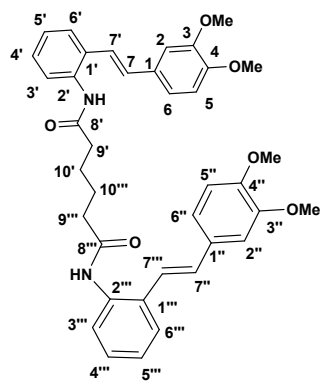

1

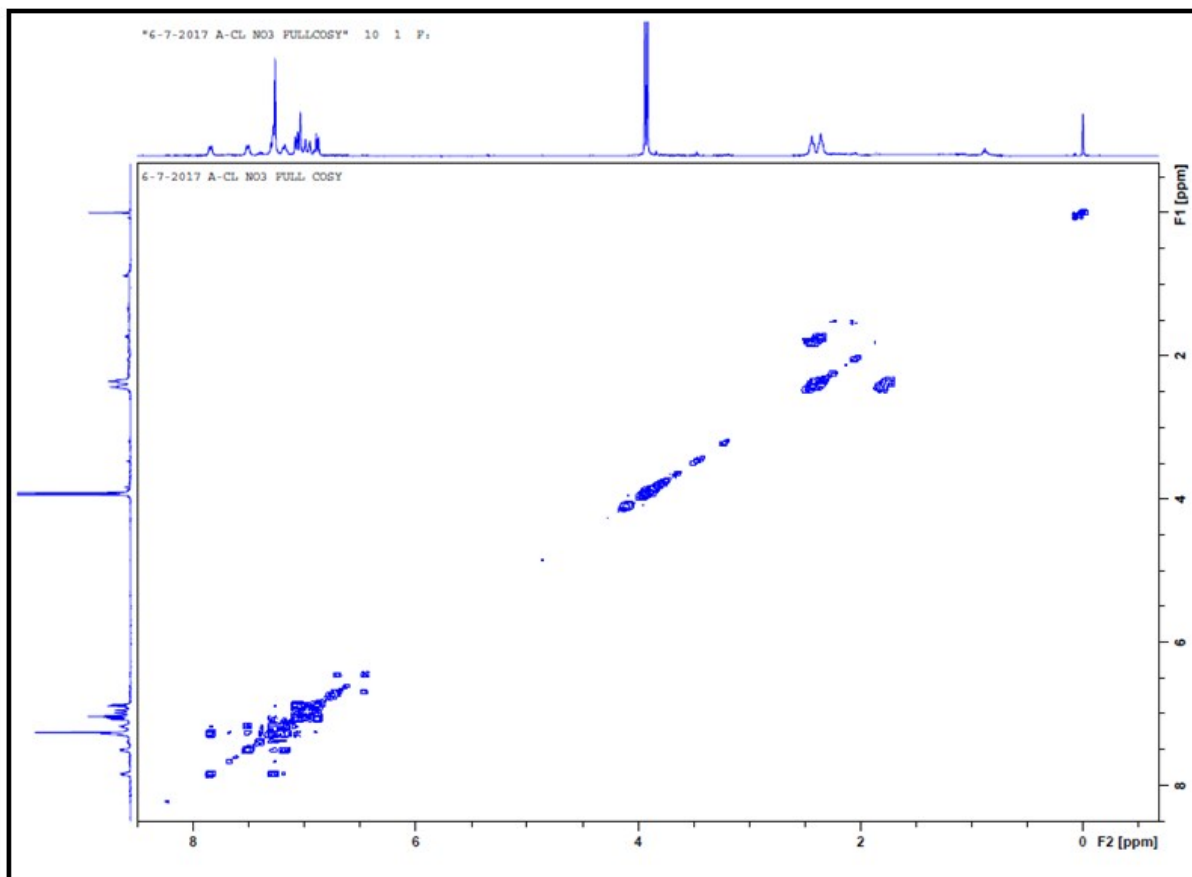

2

3

4

5

Figure S60: C COSY GPSW  $\{^1\text{H}\}$ ( $\text{CDCl}_3$ , 400MHz) spectrum of compound bis(2((E)-(3,4-dimethoxystyryl)phenyl)adipamide).

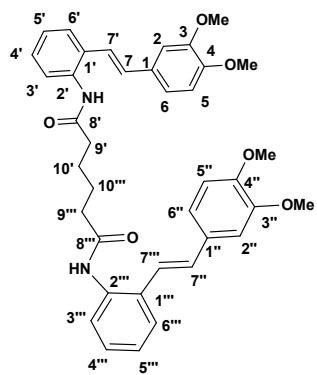

1

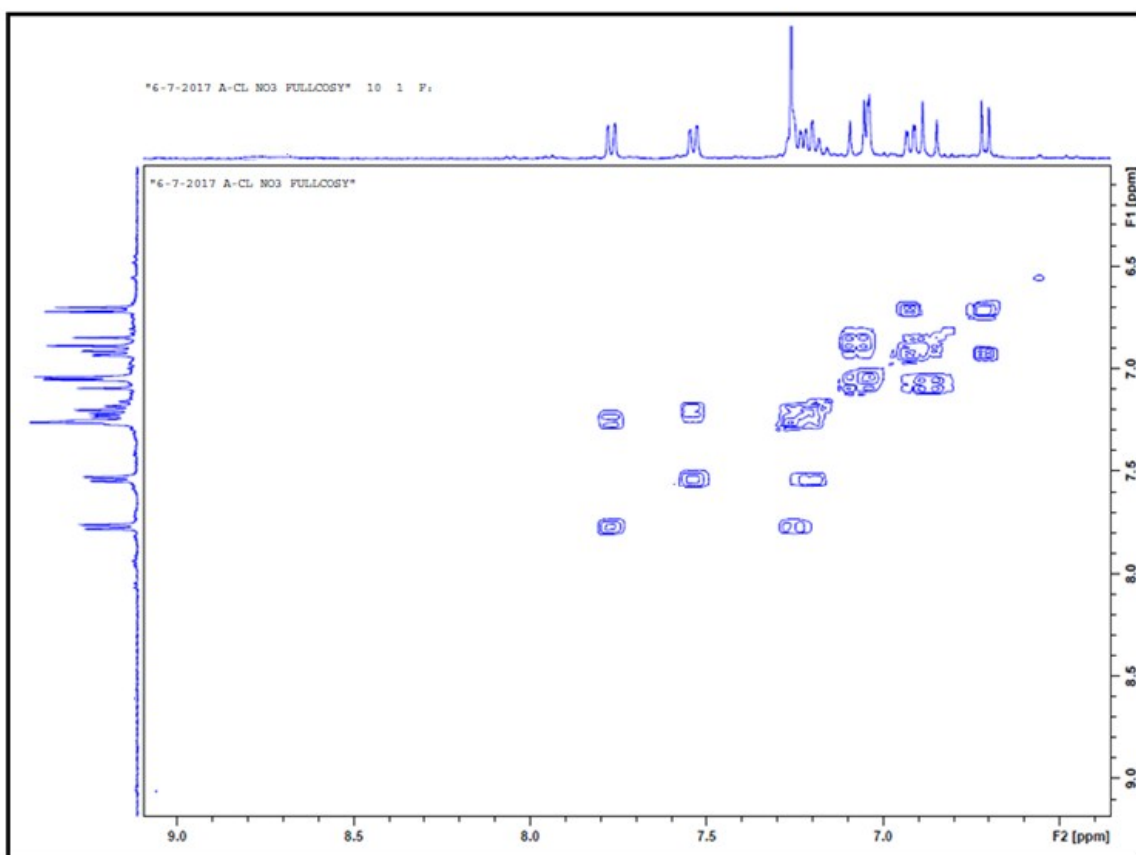

Figure S61: C COSY GPSW  $\{^1\text{H}\}$ ( $\text{CDCl}_3$ , 400MHz) spectrum of compound bis(2((E)-(3,4-dimethoxystyryl)phenyl)adipamide (EXPANSION).

2

3

4

5

6

7

8



1

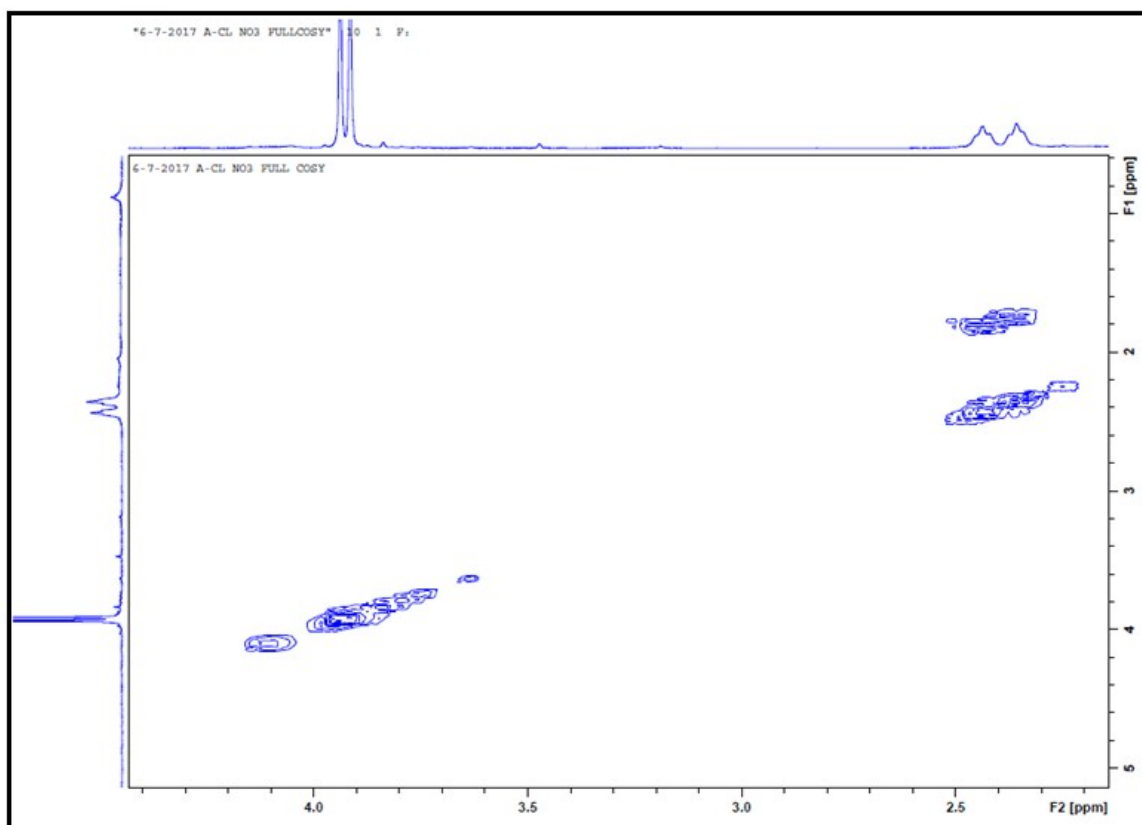

Figure S62: C COSY GPSW  $\{^1\text{H}\}$ ( $\text{CDCl}_3$ , 400MHz) spectrum of compound bis(2((E)-(3,4-dimethoxystyryl)phenyl)adipamide) (EXPANSION).

2

3

4

5

6

7

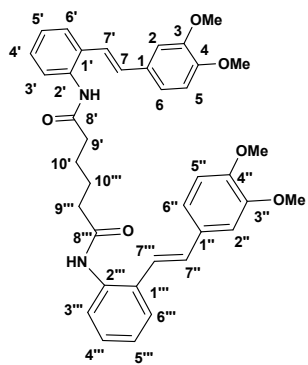

1  
2

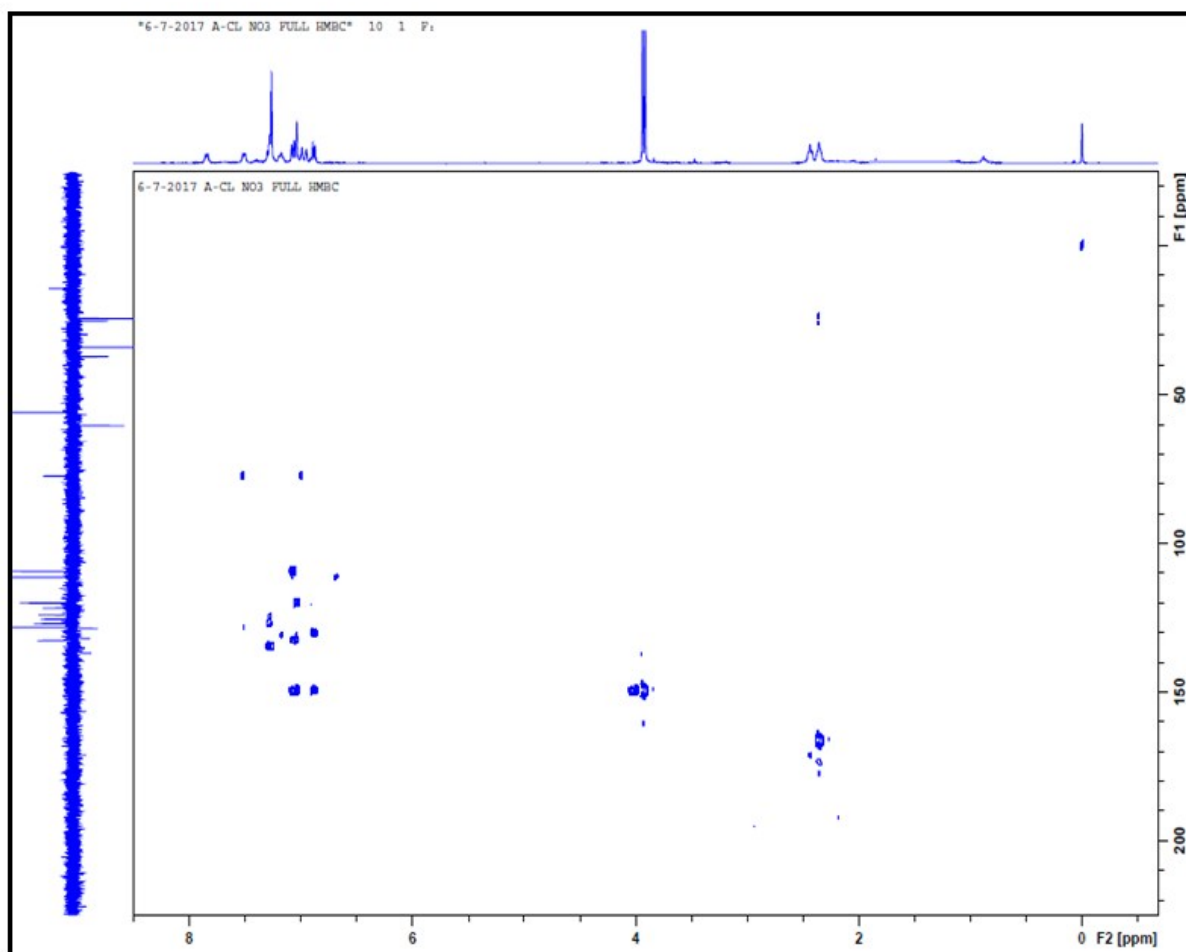

3  
4  
5  
6

Figure S63: C HMBC GP  $\{^1\text{H}-^{13}\text{C}\}$ ( $\text{CDCl}_3$ , 400MHz) spectrum of compound bis(2((E)-(3,4-dimethoxystyryl)phenyl)adipamide.



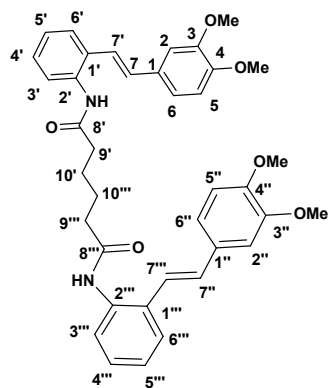

1

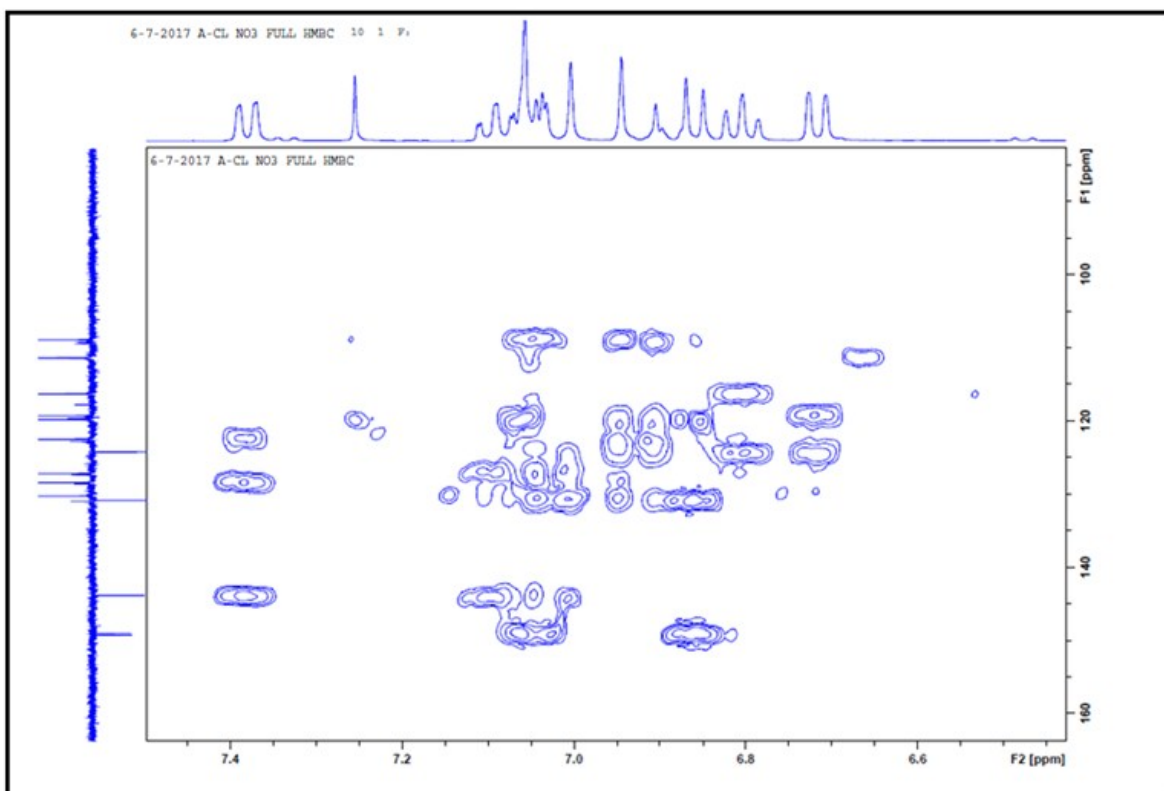

Figure S64: C HMBC GP  $\{^1\text{H}-^{13}\text{C}\}$ ( $\text{CDCl}_3$ , 400MHz) spectrum of compound bis(2((E)-(3,4-dimethoxystyryl)phenyl)adipamide) (EXPANSION).

2  
3  
4  
5  
6  
7  
8  
9

1

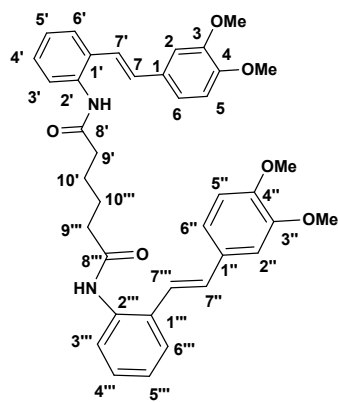

2

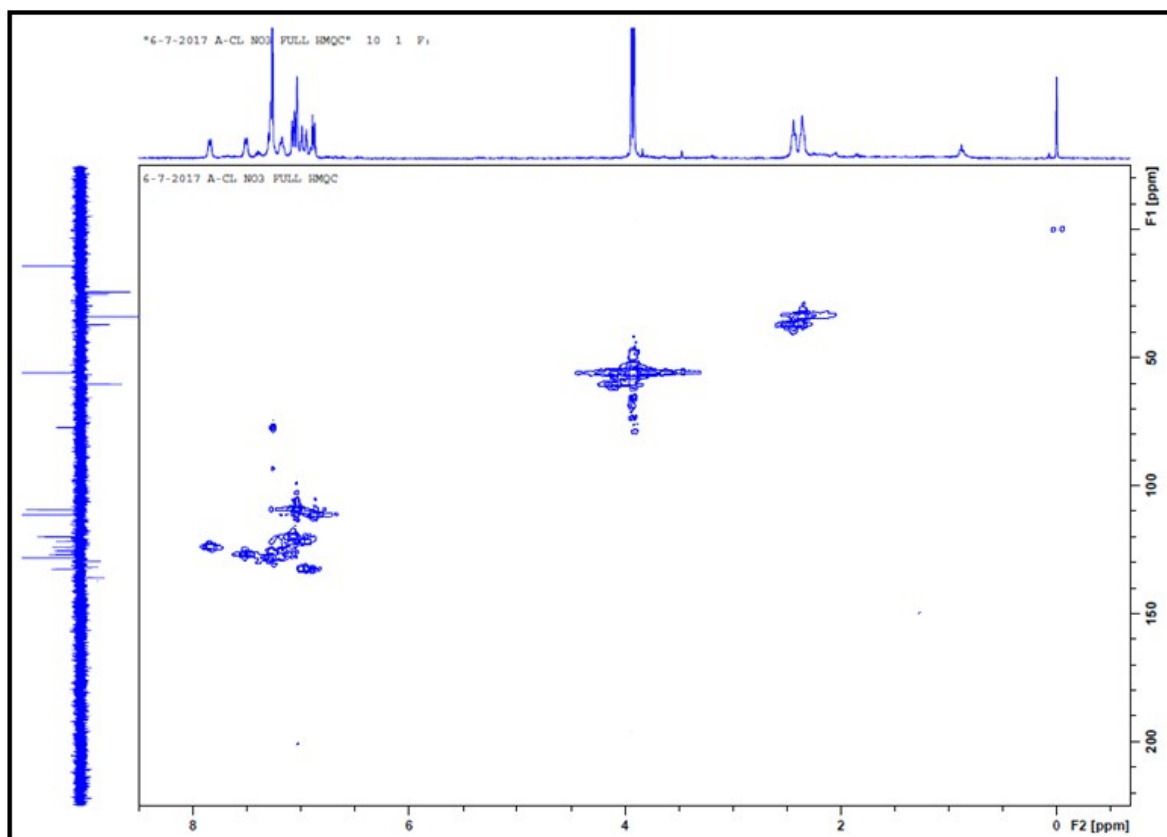

3

4

5

6

7

8

Figure S65: C HMQC GP  $\{^1\text{H}-^{13}\text{C}\}$ ( $\text{CDCl}_3$ , 400MHz) spectrum of compound bis(2((E)-(3,4-dimethoxystyryl)phenyl)adipamide.

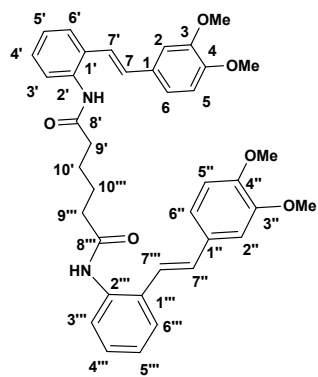

1

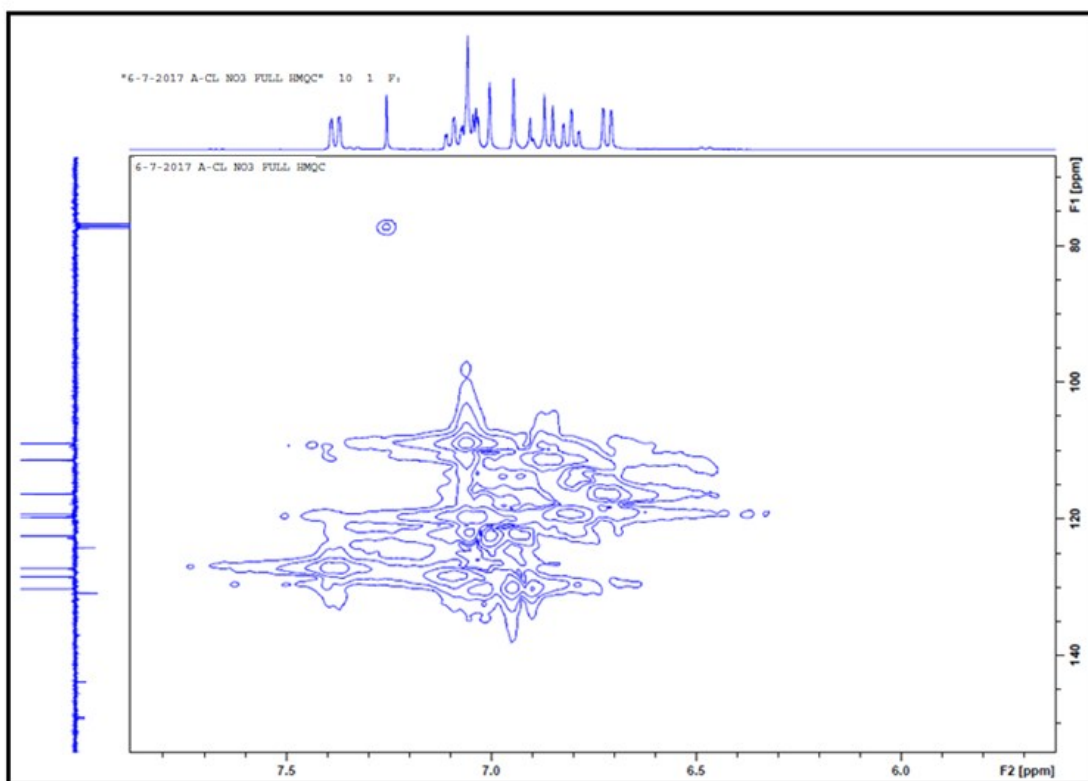

Figure S66: C HMQC GP  $\{^1\text{H}-^{13}\text{C}\}$ ( $\text{CDCl}_3$ , 400MHz) spectrum of compound bis(2((E)-(3,4-dimethoxystyryl)phenyl)adipamide) (EXPANSION).

2  
3  
4  
5  
6  
7  
8  
9

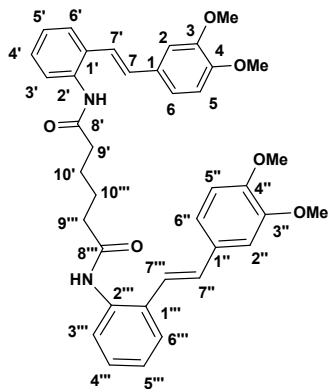

1

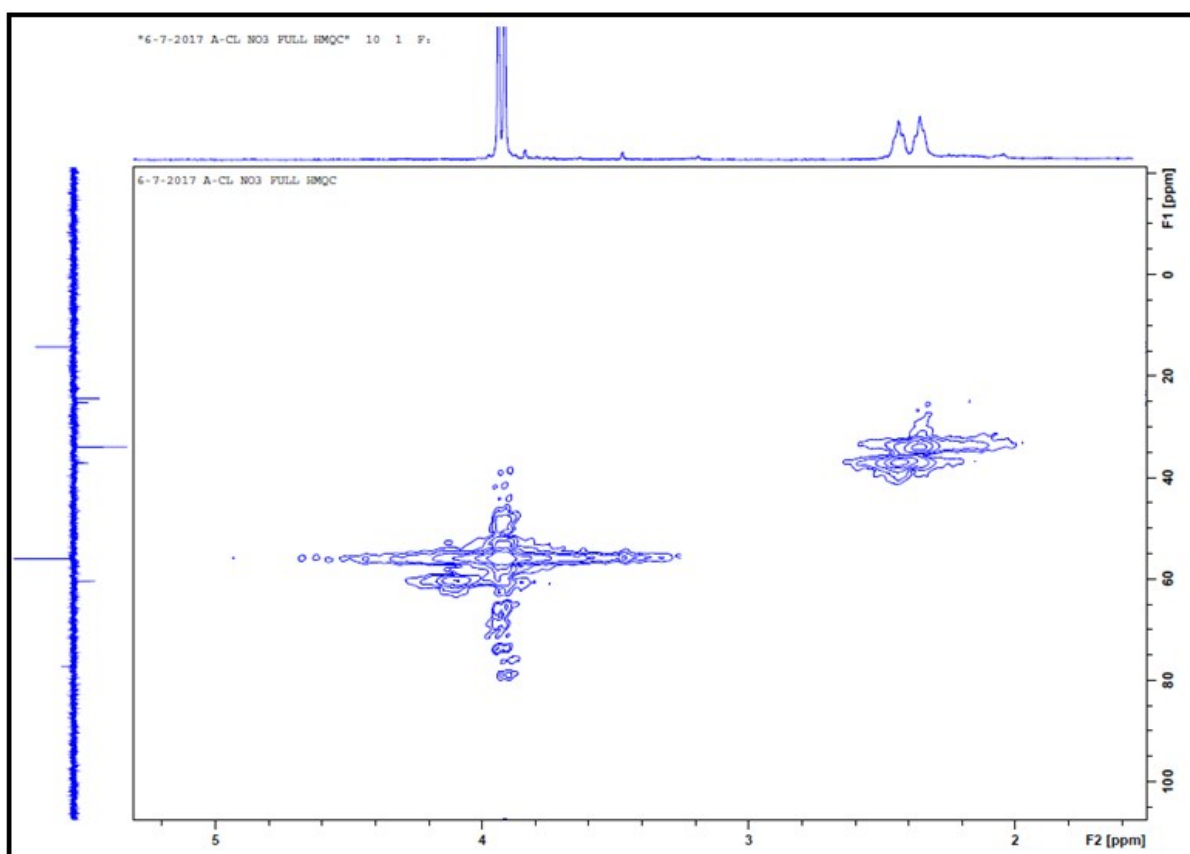

Figure S67:  $^1\text{H}$ - $^{13}\text{C}$  HMQC NMR spectrum of compound bis(2((E)-(3,4-dimethoxystyryl)phenyl)adipamide) (EXPANSION).

2  
3  
4  
5  
6  
7

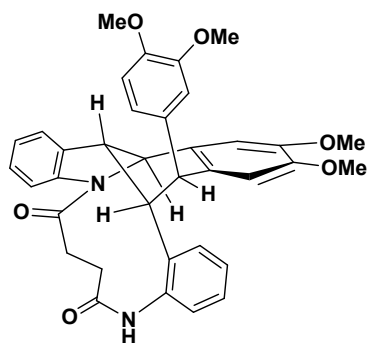

1

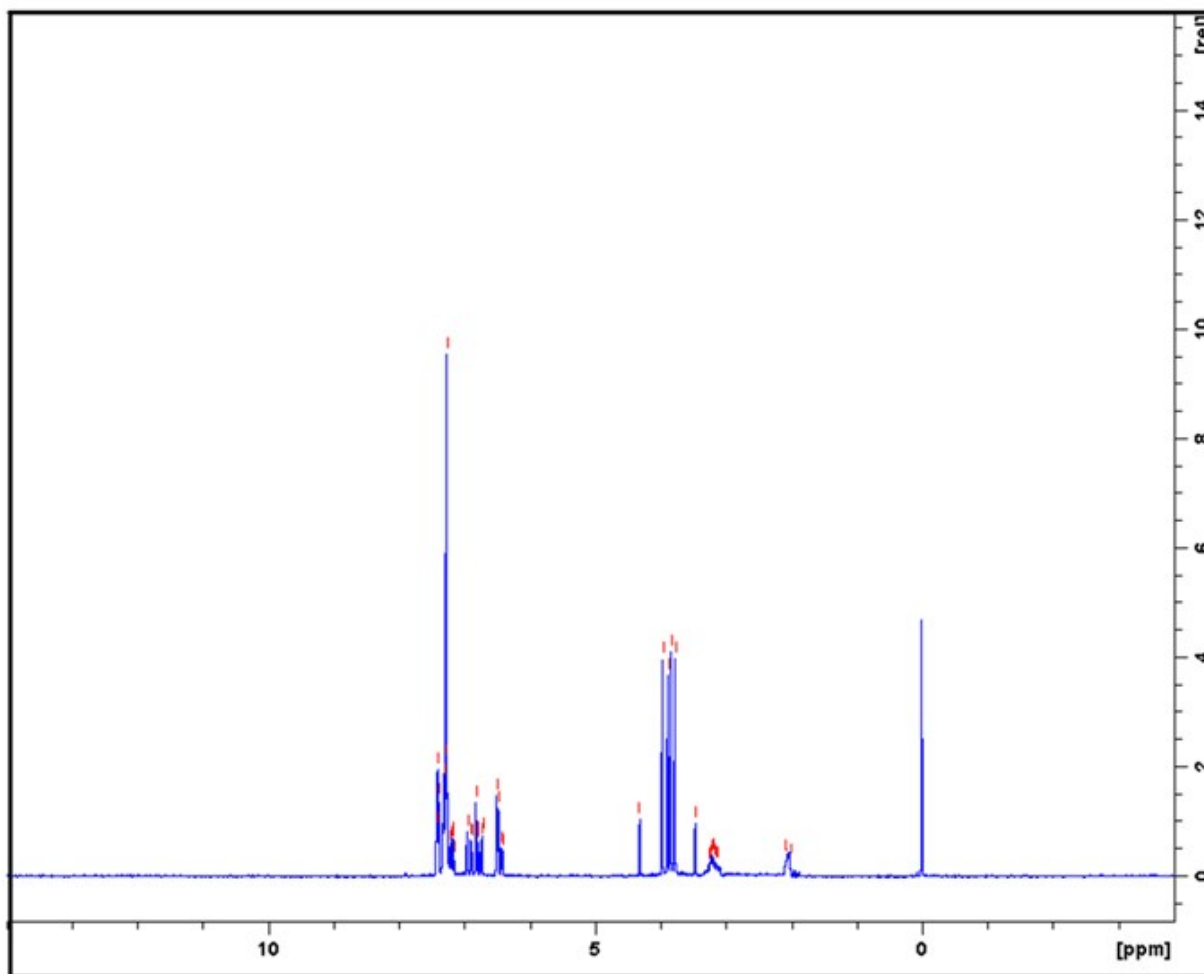

2

3

Figure S68: <sup>1</sup>H NMR (CDCl<sub>3</sub>, 400MHz) spectrum of compound (73) Scheme 17.

4

5

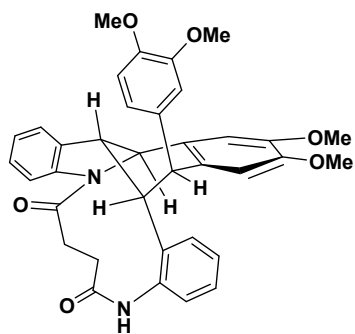

1

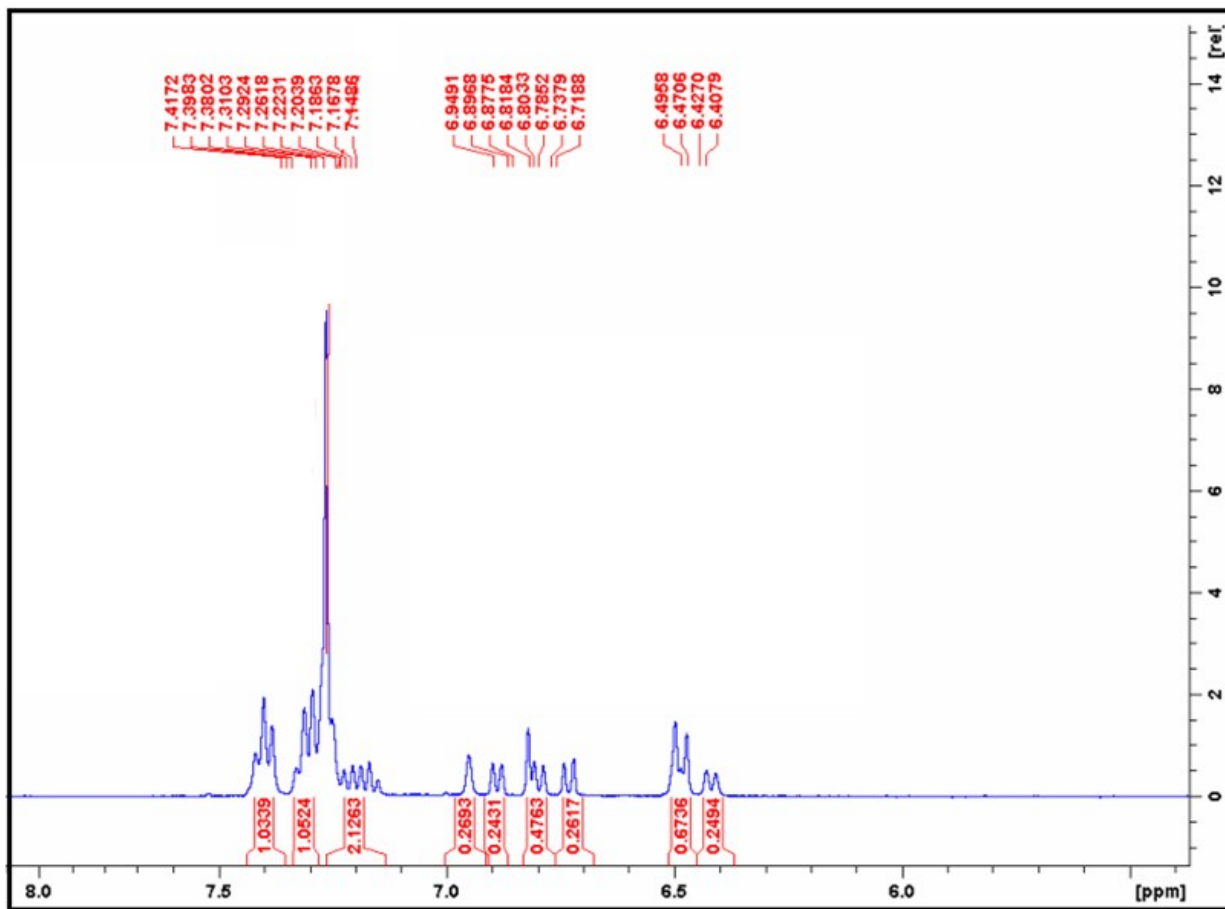

2

3

Figure S69: <sup>1</sup>H NMR (CDCl<sub>3</sub>, 400MHz) spectrum of compound (73) Scheme 17 (EXPANSION).

4

5

6

7

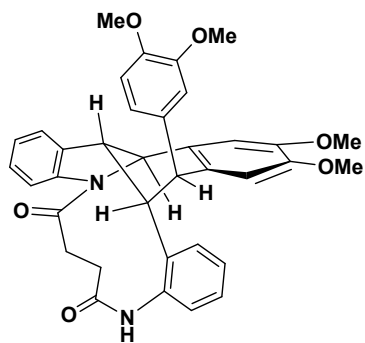

1

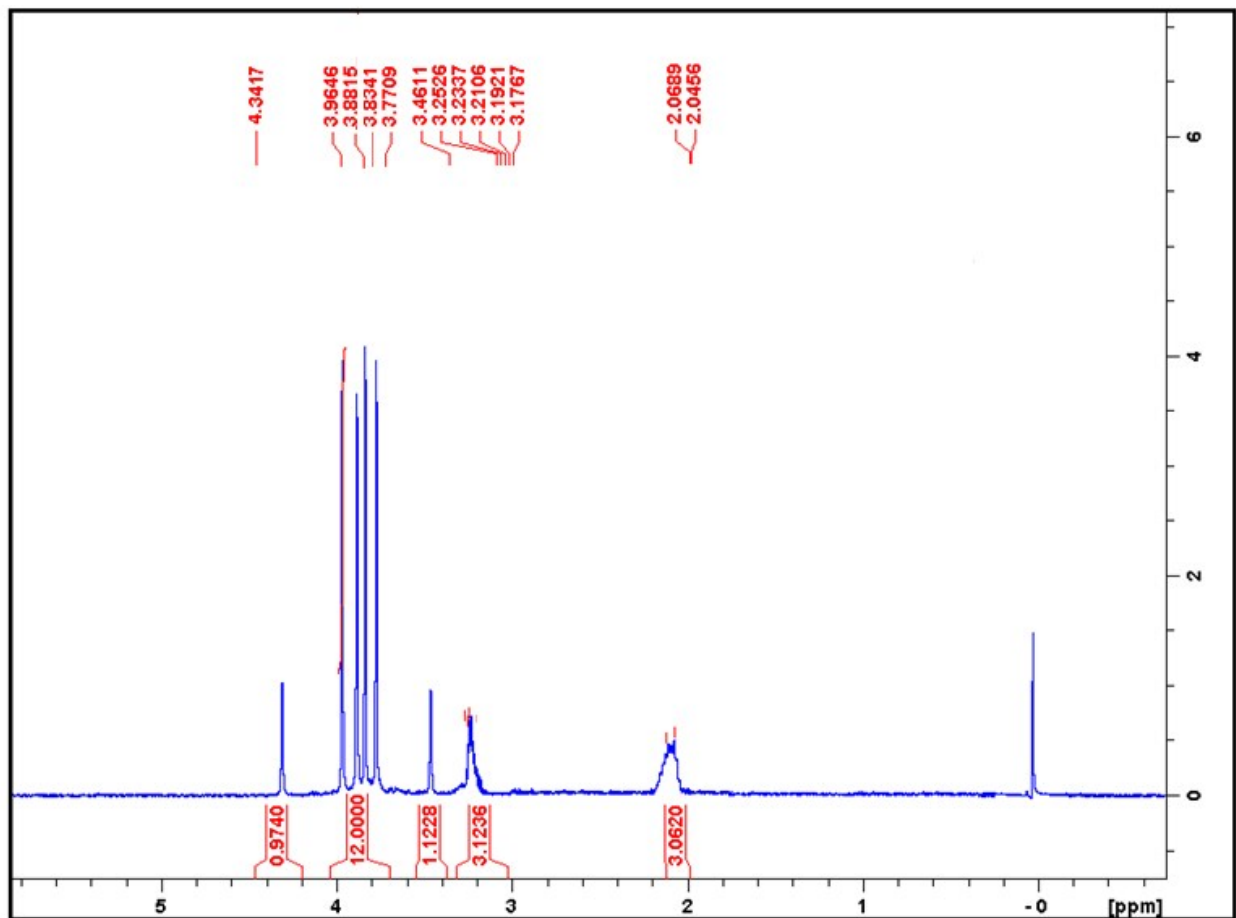

2

3

Figure S70:  $^1\text{H}$  NMR ( $\text{CDCl}_3$ , 400MHz) spectrum of compound (73) Scheme 17 (EXPANSION).

4

5

6

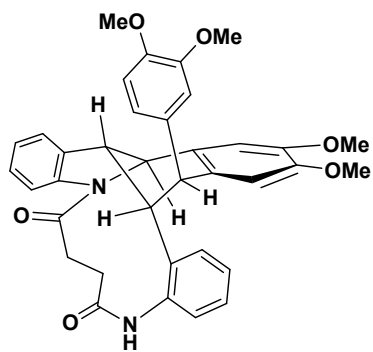

1

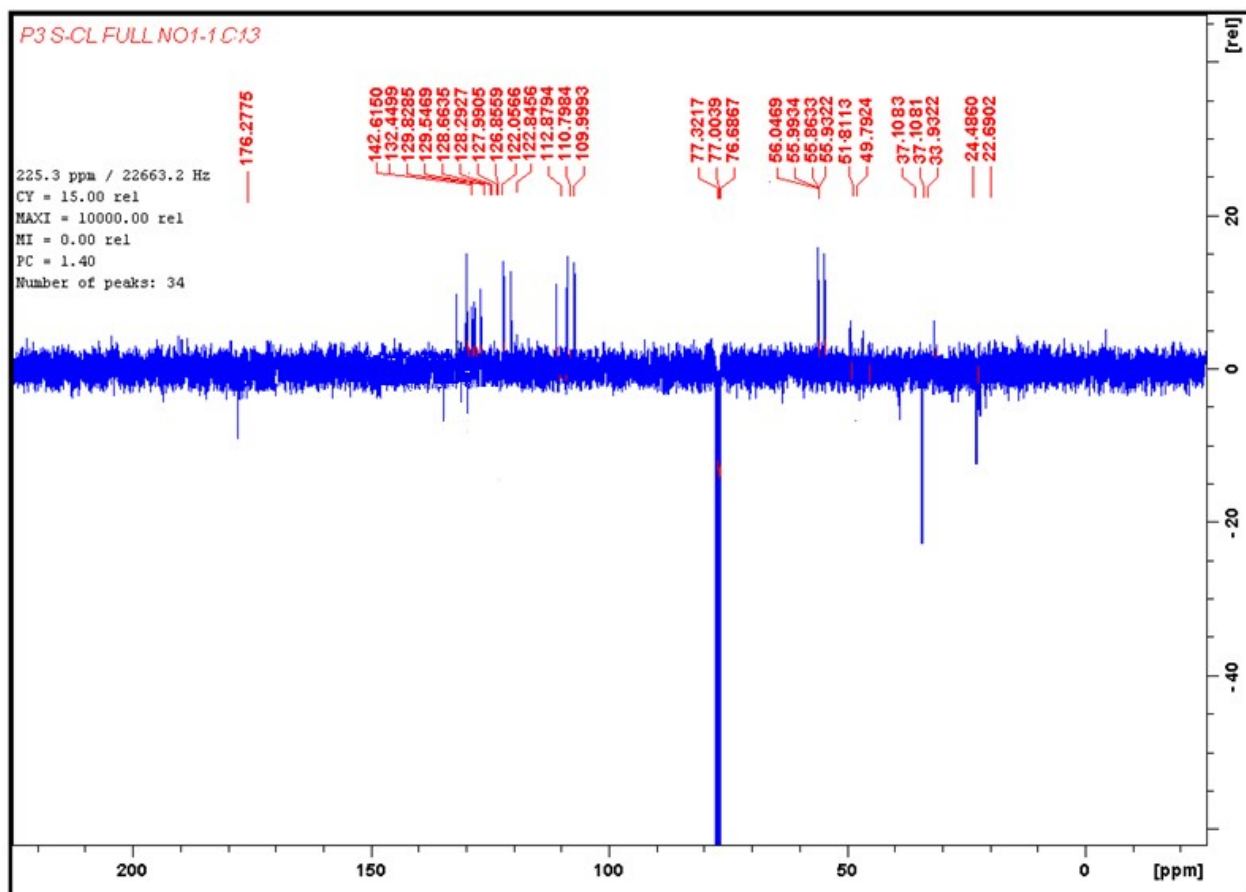

2

3

Figure S71: <sup>13</sup>C DEPT135, CH<sub>3</sub>/CH po {<sup>1</sup>H}(CDCl<sub>3</sub>, 400MHz) spectrum of compound (73) Scheme

4

17.





1

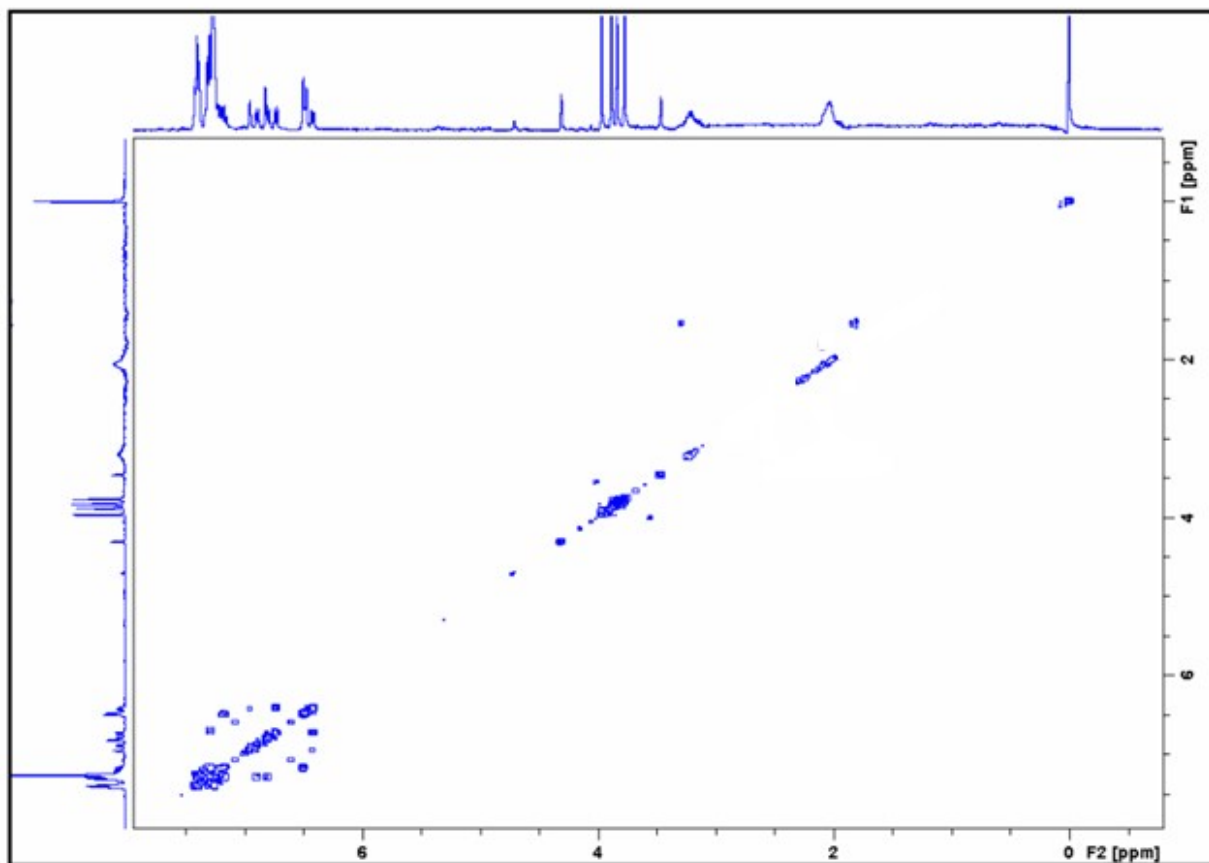

2

3

Figure S72: C COSY GPSW <sup>1</sup>H(CDCl<sub>3</sub>, 400MHz) spectrum of compound compound (73) Scheme 17.

4

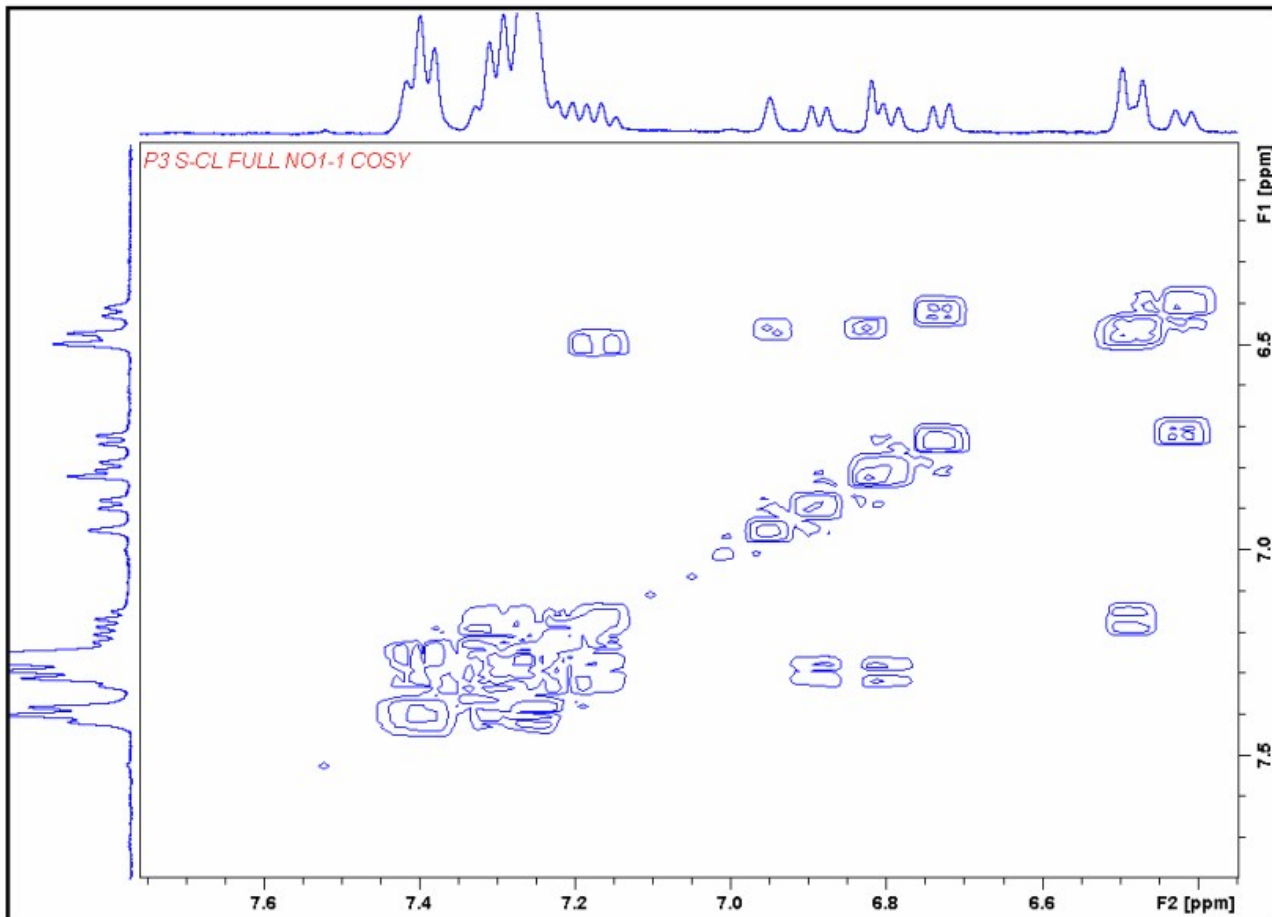

1  
2  
3  
4  
5  
6  
7  
8  
9  
10

Figure S73: C COSY GPSW {<sup>1</sup>H}(CDCl<sub>3</sub>, 400MHz) spectrum of compound (73) Scheme 17 (EXPANSION).

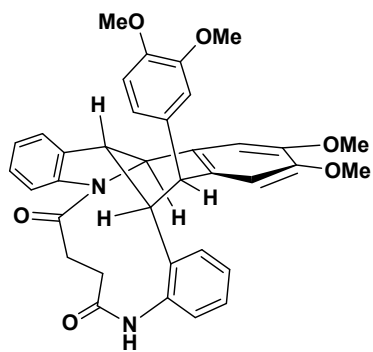

1

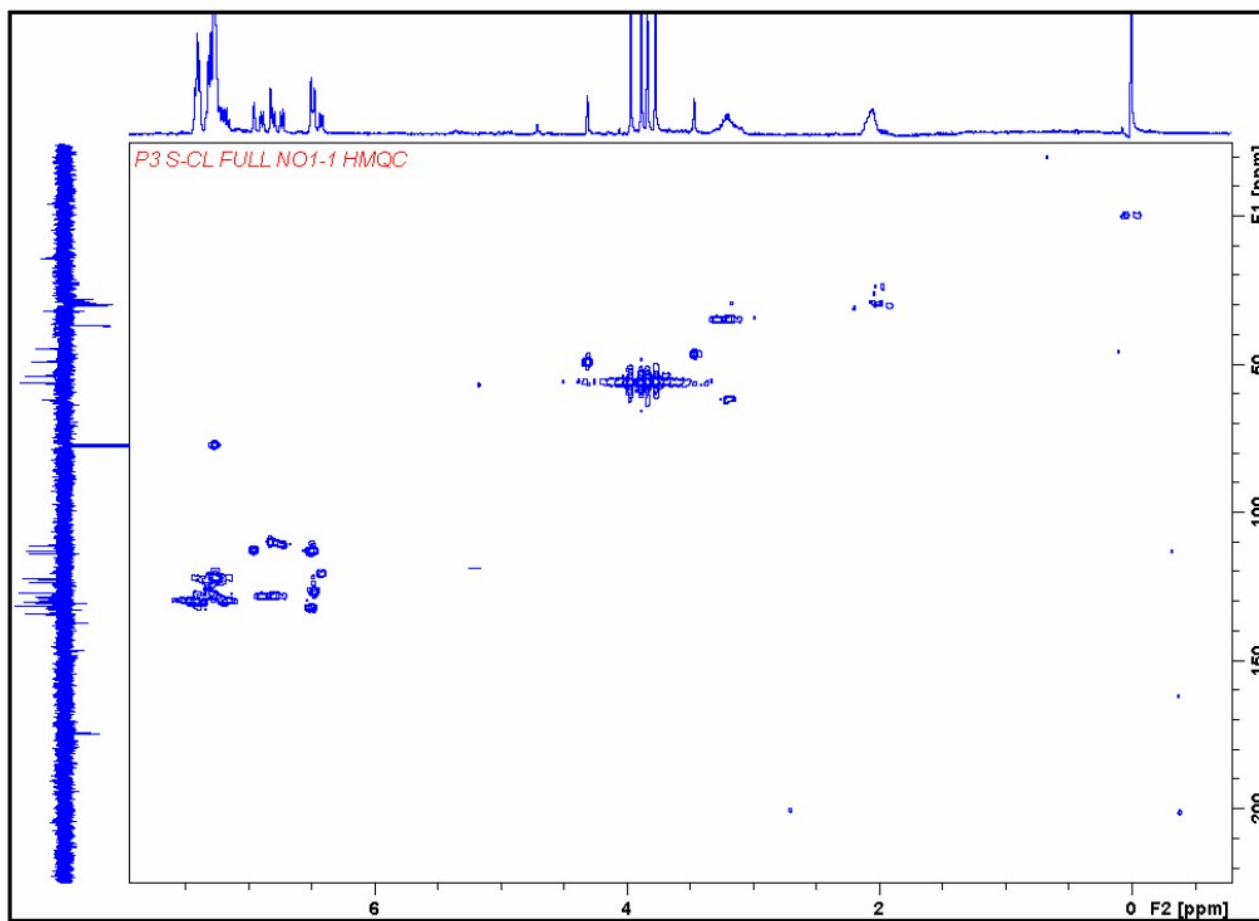

2  
3

Figure S74:  $^{13}\text{C}$  HMQC GP  $\{^1\text{H}-^{13}\text{C}\}$  ( $\text{CDCl}_3$ , 400MHz) spectrum of compound (73) Scheme 17.

4

5

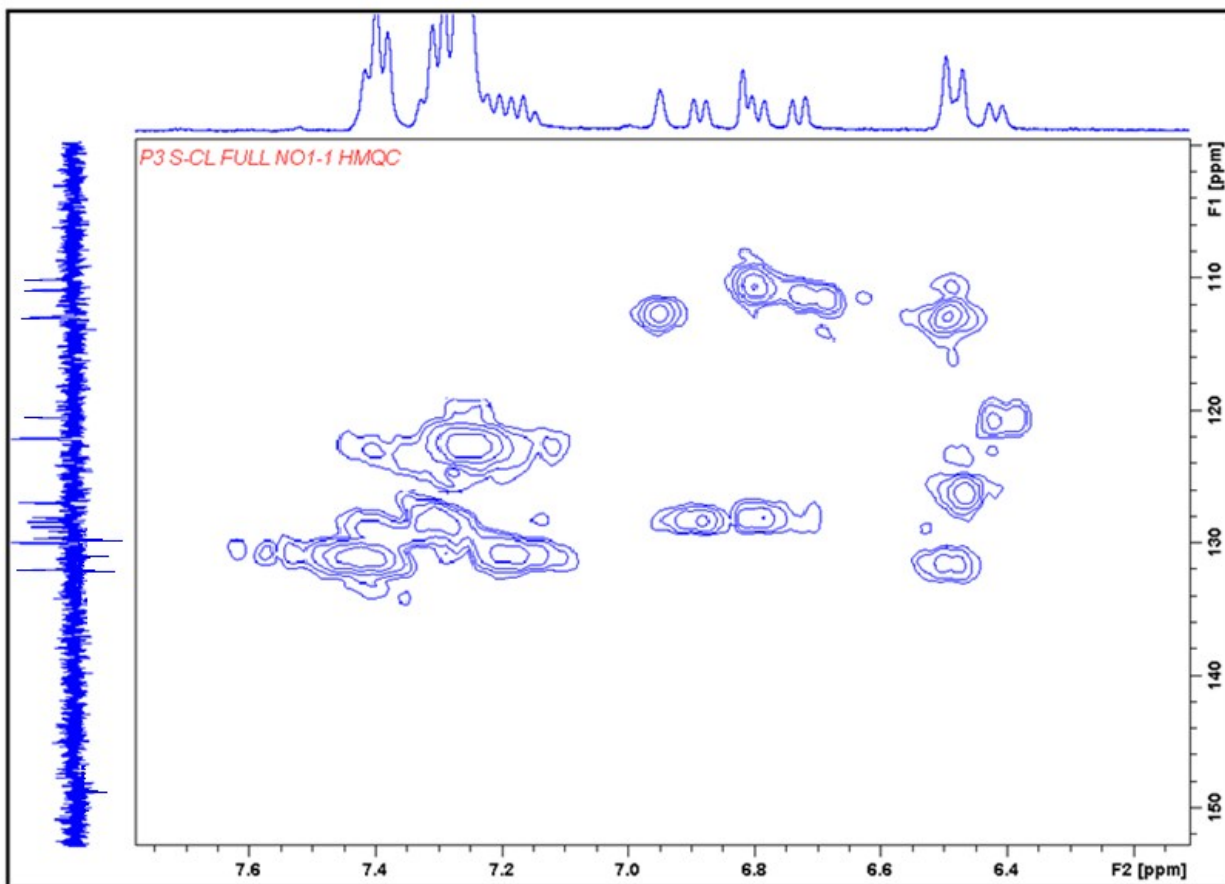

1  
2  
3  
4

Figure S75: C HMQC GP  $\{^1\text{H}-^{13}\text{C}\}$ ( $\text{CDCl}_3$ , 400MHz) s spectrum of compound compound (73) Scheme 17  
(EXPANSION).

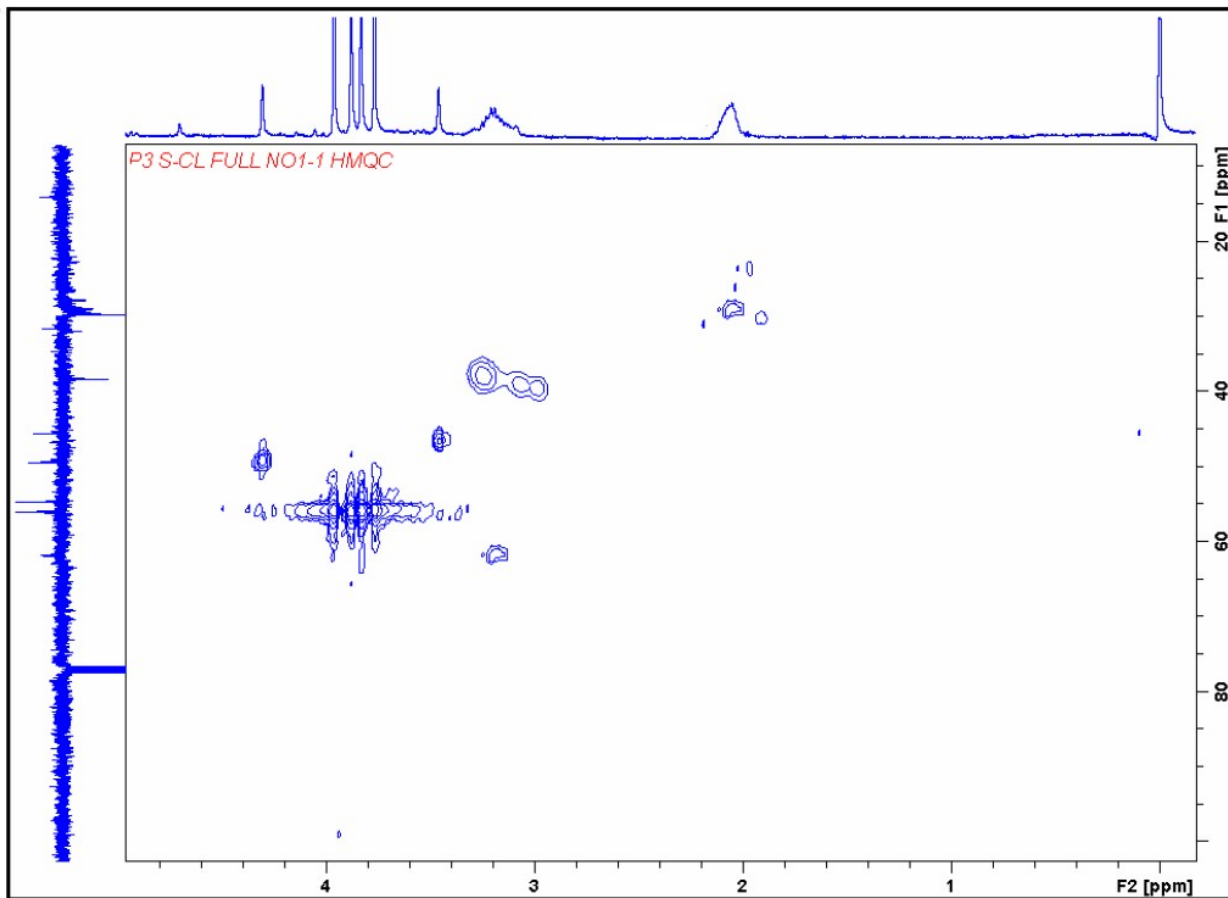

Figure S76:  $^1\text{H}$ - $^{13}\text{C}$  HMQC GP  $\{^1\text{H}$ - $^{13}\text{C}\}$ ( $\text{CDCl}_3$ , 400MHz) spectrum of compound (73) Scheme 17

(EXPANSION).

1  
2  
3  
4  
5

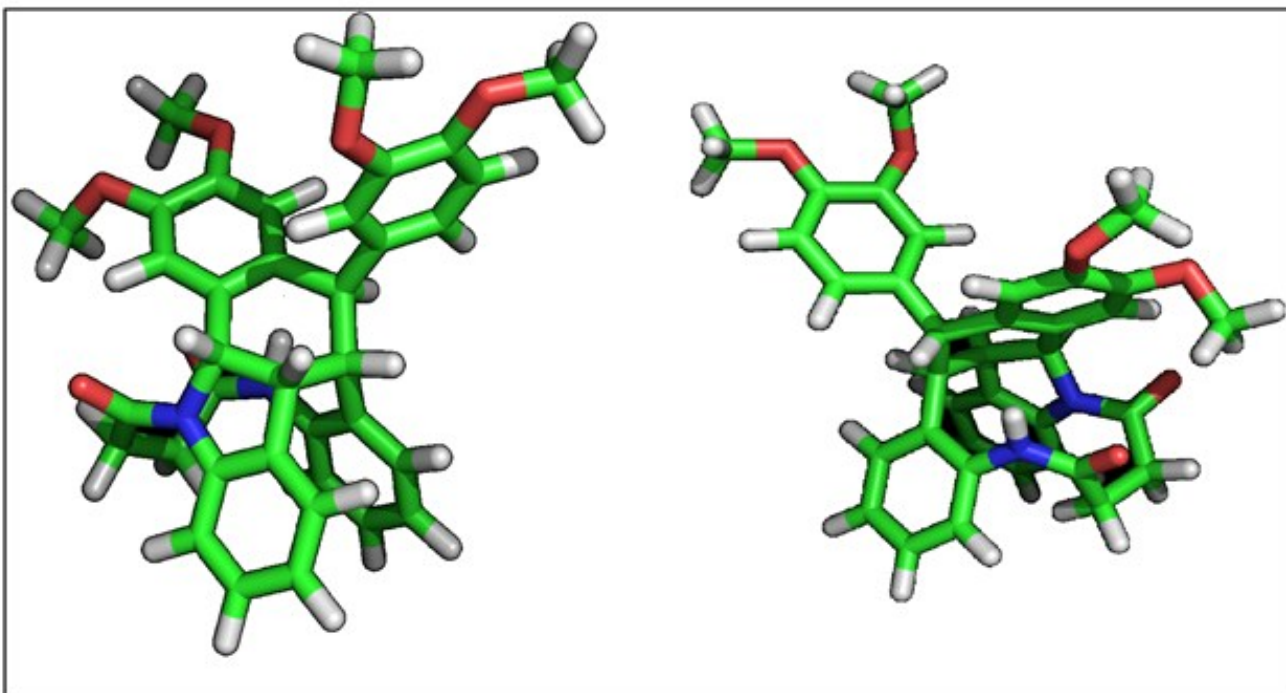

1  
2  
3  
4  
5  
6  
7  
8  
9

**Figure S77** : Two views of the Chem 3D of compound **73**.

**Data File** 3 4 MEO NEG.d **Sample Name** 3 4 MEO NEG  
**Sample Type** Sample **Position** P1-A2  
**Instrument Name** Instrument 1 **User Name**  
**Acq Method** MARYAM SADAT NEG.m **Acquired Time** 02-Aug-17 5:15:58 PM  
**IRM Calibration Status** Success **DA Method** default.m  
**Comment**

**Sample Group** **Info.**  
**Acquisition SW** 6200 series TOF/6500  
**Version** series Q-TOF B.05.01  
 (B5125.3)

Compound Table

| Compound Label   | Data File | RT    | Mass   | Abund | Name | Formula   | Tgt Mass | Diff (ppm) | MFG Formula | MFG Diff (ppm) | DB Formula |
|------------------|-----------|-------|--------|-------|------|-----------|----------|------------|-------------|----------------|------------|
| Cpd 1: C16H17NO2 |           | 2.278 | 255.32 | 5790  |      | C16H17NO2 | 255.1259 | 0.94       | C16H17NO2   |                | C16H17NO2  |

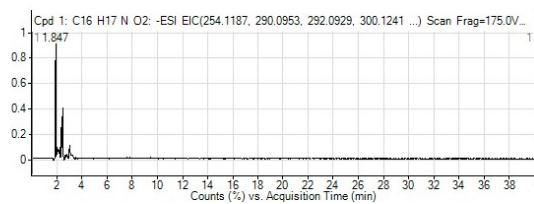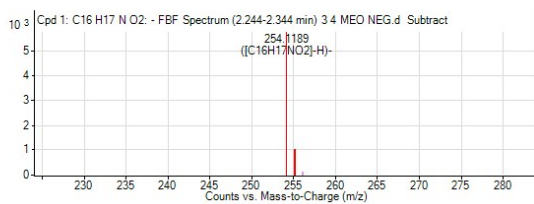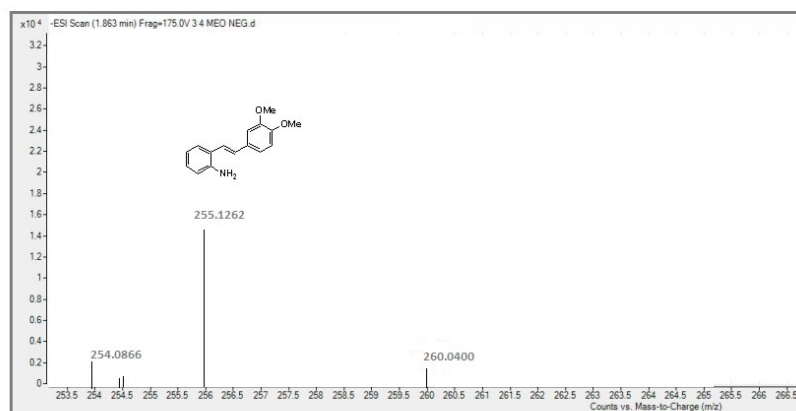

MS Spectrum Peak List

| m/z      | Calc m/z | Diff(ppm) | z | Abund   | Formula   | Ion    |
|----------|----------|-----------|---|---------|-----------|--------|
| 254.1189 |          |           | 1 | 5790.48 | C16H17NO2 | (M+H)- |
| 255.322  |          |           | 1 | 567.57  | C16H17NO2 | (M+H)- |

1  
2  
3

Figure S78: Mass information of compound (E)-2-(3,4-dimethoxystyryl)aniline.

**Data File** 3 4 MEO M CI NEG.d **Sample Name** 3 4 MEO M CI NEG  
**Sample Type** Sample **Position** P1-A6  
**Instrument Name** Instrument 1 **User Name**  
**Acq Method** MARYAM SADAT NEG.m **Acquired Time** 03-Aug-17 8:38:30 AM  
**IRM Calibration Status** Success **DA Method** default.m  
**Comment**

**Sample Group**  
**Acquisition SW** 6200 series TOF/6500  
**Version** series Q-TOF B.05.01 (B5125.3)

**Compound Table**

| Compound Label       | Data File | RT    | Mass     | Abund  | Name | Formula       | Tqt Mass | Diff (ppm) | MFG Formula   | MFG Diff (ppm) | DB Formula    |
|----------------------|-----------|-------|----------|--------|------|---------------|----------|------------|---------------|----------------|---------------|
| Cpd 1: C35 H34 N2 O6 |           | 2.308 | 578.2418 | 838747 |      | C35 H34 N2 O6 | 578.2417 | 0.28       | C35 H34 N2 O6 |                | C35 H34 N2 O6 |

| Compound Label       | Name | m/z      | RT    | Algorithm       | Mass     |
|----------------------|------|----------|-------|-----------------|----------|
| Cpd 1: C35 H34 N2 O6 |      | 577.2348 | 2.308 | Find By Formula | 578.2418 |

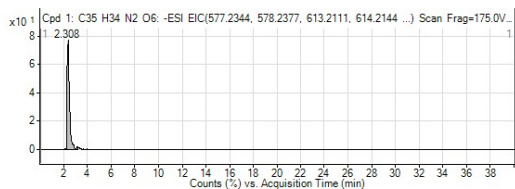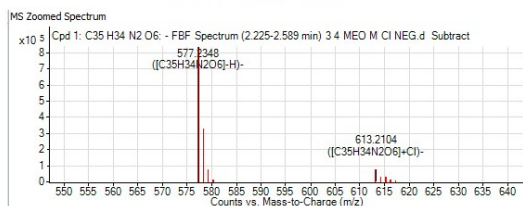

**MS Spectrum Peak List**

| m/z      | Calc m/z | Diff(ppm) | z | Abund     | Formula    | Ion     |
|----------|----------|-----------|---|-----------|------------|---------|
| 577.2348 |          |           | 1 | 838747.06 | C35H34N2O6 | (M+H)-  |
| 578.2378 |          |           | 1 | 324719.91 | C35H34N2O6 | (M+H)-  |
| 579.24   |          |           | 1 | 48982.52  | C35H34N2O6 | (M+H)-  |
| 580.2418 |          |           | 1 | 2976.33   | C35H34N2O6 | (M+H)-  |
| 613.2104 |          |           | 1 | 78116.98  | C35H34N2O6 | (M+Cl)- |
| 614.213  |          |           | 1 | 18991.65  | C35H34N2O6 | (M+Cl)- |
| 615.2085 |          |           | 1 | 17427.04  | C35H34N2O6 | (M+Cl)- |
| 616.2099 |          |           | 1 | 3095.16   | C35H34N2O6 | (M+Cl)- |
| 617.2111 |          |           | 1 | 352.83    | C35H34N2O6 | (M+Cl)- |

--- End Of Report ---

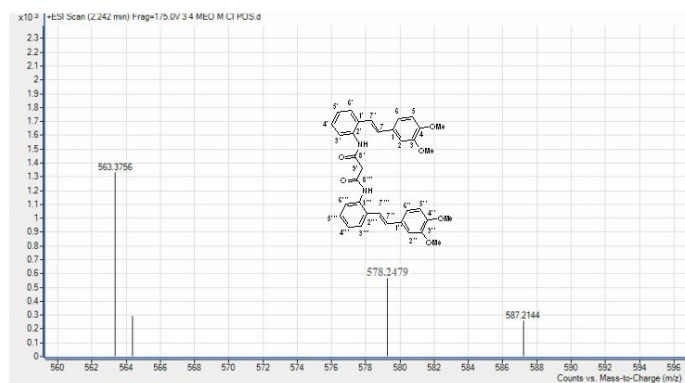

1  
2  
3  
4

**Figure S79: Mass spectral data for compound bis (2-(E)-3,4-dimethoxystyryl)phenyl malonamide.**



**Data File** 3-4 MEO S CI POS.d **Sample Name** 3-4 MEO S CI POS  
**Sample Type** Sample **Position** P1-A2  
**Instrument Name** Instrument 1 **User Name**  
**Acq Method** MARYAM SADAT POS.m **Acquired Time** 12-Jul-17 11:39:36 AM  
**IRI Calibration Status** Success **DA Method** default.m  
**Comment**

**Sample Group** **Info.**  
**Acquisition SW** 6200 series TOF/6500  
**Version** series Q-TOF B.05.01  
 (B5125.3)

**Compound Table**

| Compound Label       | Data File | RT    | Mass     | Abund | Name | Formula       | Tgt Mass | Diff (ppm) | MFG Formula   | MFG Diff (ppm) | DB Formula    |
|----------------------|-----------|-------|----------|-------|------|---------------|----------|------------|---------------|----------------|---------------|
| Cpd 2: C36 H36 N2 O6 |           | 1.594 | 592.2557 | 1605  |      | C36 H36 N2 O6 | 592.2573 | -2.75      | C36 H36 N2 O6 |                | C36 H36 N2 O6 |

| Compound Label       | Name | m/z      | RT    | Algorithm       | Mass     |
|----------------------|------|----------|-------|-----------------|----------|
| Cpd 2: C36 H36 N2 O6 |      | 593.2631 | 1.594 | Find By Formula | 592.2557 |

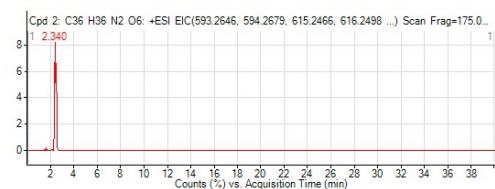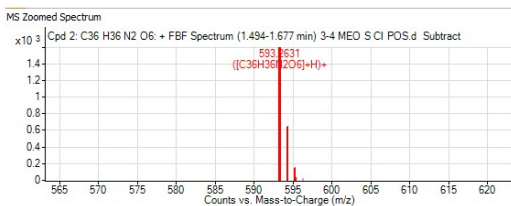

**MS Spectrum Peak List**

| m/z      | Calc m/z | Diff(ppm) | z | Abund   | Formula    | Ion    |
|----------|----------|-----------|---|---------|------------|--------|
| 593.2631 |          |           | 1 | 1605.02 | C36H36N2O6 | (M+H)+ |
| 594.2638 |          |           | 1 | 370.72  | C36H36N2O6 | (M+H)+ |
| 595.2686 |          |           | 1 | 45.67   | C36H36N2O6 | (M+H)+ |

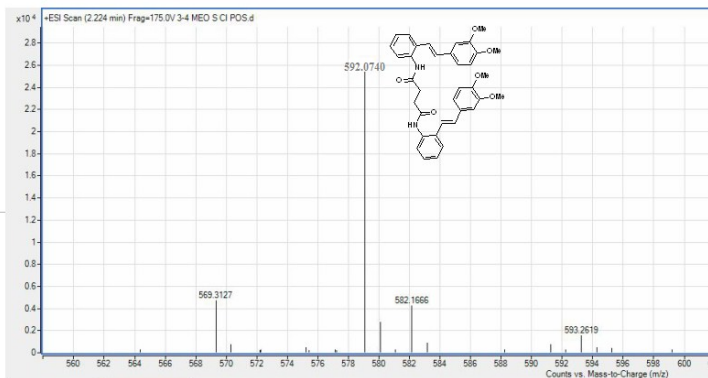

1  
2

**Figure S80: Mass spectral data for compound bis(2((E)-(3,4-dimethoxystyryl)phenyl)succinamide.**

**Data File** 3 4 MEO GCI NEG.d **Sample Name** 3 4 MEO GCI NEG  
**Sample Type** Sample **Position** P1-A5  
**Instrument Name** Instrument 1 **User Name**  
**Acq Method** MARYAM SADAT NEG.m **Acquired Time** 02-Aug-17 7:47:54 PM  
**IRM Calibration Status** Success **DA Method** default.m  
**Comment**

**Sample Group** Info.  
**Acquisition SW** 6200 series TOF/6500  
**Version** series Q-TOF B.05.01  
 (B5125.3)

**Compound Table**

| Compound Label       | Data File | RT    | Mass     | Abund  | Name | Formula    | Tgt Mass | Diff (ppm) | MFG Formula | MFG Diff (ppm) | DB Formula |
|----------------------|-----------|-------|----------|--------|------|------------|----------|------------|-------------|----------------|------------|
| Cpd 1: C37 H38 N2 O6 |           | 2.327 | 606.2723 | 226874 |      | C37H38N2O6 | 606.273  | -1.08      | C37H38N2O6  |                | C37H38N2O6 |

| Compound Label       | Name | m/z      | RT    | Algorithm       | Mass     |
|----------------------|------|----------|-------|-----------------|----------|
| Cpd 1: C37 H38 N2 O6 |      | 605.2653 | 2.327 | Find By Formula | 606.2723 |

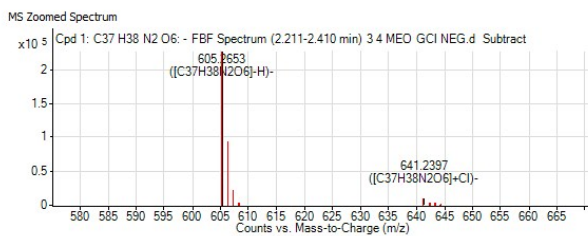

**MS Spectrum Peak List**

| m/z      | Calc m/z | Diff(ppm) | z | Abund     | Formula    | Ion     |
|----------|----------|-----------|---|-----------|------------|---------|
| 605.2653 |          |           | 1 | 226873.64 | C37H38N2O6 | (M-H)-  |
| 606.2682 |          |           | 1 | 76128.48  | C37H38N2O6 | (M-H)-  |
| 607.2704 |          |           | 1 | 7741.57   | C37H38N2O6 | (M-H)-  |
| 608.2718 |          |           | 1 | 517.17    | C37H38N2O6 | (M-H)-  |
| 641.2397 |          |           | 1 | 9114.51   | C37H38N2O6 | (M+Cl)- |
| 642.2422 |          |           | 1 | 1962.98   | C37H38N2O6 | (M+Cl)- |
| 643.2385 |          |           | 1 | 1741.4    | C37H38N2O6 | (M+Cl)- |
| 644.2397 |          |           | 1 | 366.84    | C37H38N2O6 | (M+Cl)- |

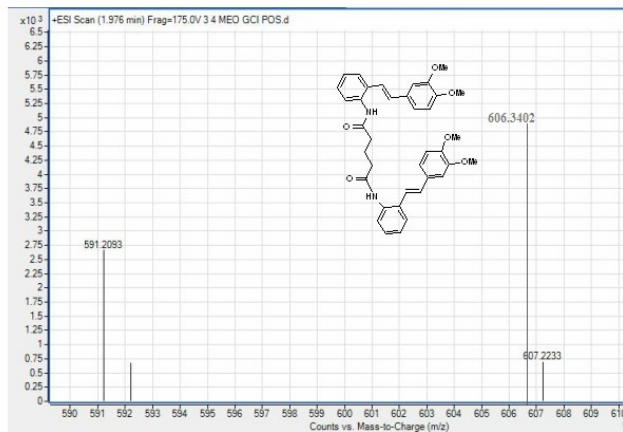

--- End Of Report ---

1  
2  
3

**Figure S81: Mass spectral data for compound bis(2((E)-(3,4-dimethoxystyryl)phenyl) glutaramide.**

**Data File** 3-4 MEO ADCl POS.d **Sample Name** 3-4 MEO ADCl POS  
**Sample Type** Sample **Position** P1-A4  
**Instrument Name** Instrument 1 **User Name**  
**Acq Method** MARYAM SADAT POS.m **Acquired Time** 12-Jul-17 1:20:55 PM  
**IRM Calibration Status** Success **DA Method** default.m  
**Comment**

**Sample Group** **Info.**  
**Acquisition SW** 6200 series TOF/6500  
**Version** series Q-TOF B.05.01  
 (85125.3)

**Compound Table**

| Compound Label       | Data File | RT   | Mass     | Abund  | Name | Formula       | Tgt Mass | Diff | MFG Formula   | MFG Diff (ppm) | DB Formula    |
|----------------------|-----------|------|----------|--------|------|---------------|----------|------|---------------|----------------|---------------|
| Cpd 1: C38 H40 N2 O6 |           | 2.51 | 620.2889 | 157834 |      | C38 H40 N2 O6 | 620.2886 | 0.48 | C38 H40 N2 O6 |                | C38 H40 N2 O6 |

| Compound Label       | Name | m/z      | RT   | Algorithm       | Mass     |
|----------------------|------|----------|------|-----------------|----------|
| Cpd 1: C38 H40 N2 O6 |      | 643.2785 | 2.51 | Find By Formula | 620.2889 |

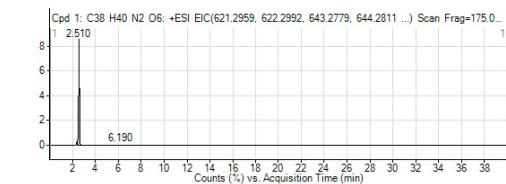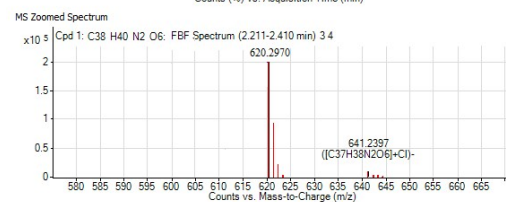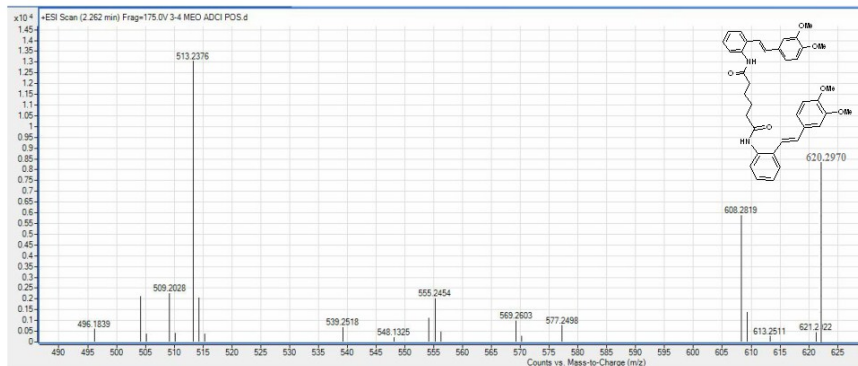

**MS Spectrum Peak List**

| m/z      | Calc m/z | Diff(ppm) | z | Abund     | Formula    | Ion     |
|----------|----------|-----------|---|-----------|------------|---------|
| 621.2958 |          |           | 1 | 47876.59  | C38H40N2O6 | (M+H)+  |
| 622.2986 |          |           | 1 | 12430.74  | C38H40N2O6 | (M+H)+  |
| 623.3005 |          |           | 1 | 1250.77   | C38H40N2O6 | (M+H)+  |
| 643.2785 |          |           | 1 | 157833.83 | C38H40N2O6 | (M+Na)+ |

1  
2  
3  
4

**Figure S82: Mass spectral data for bis(2((E)-(3,4-dimethoxystyryl)phenyl)adipamide.**

Data File: P33 4 MEO 5 CI POS.d  
 Sample Type: Sample  
 Instrument Name: Instrument 1  
 Acq Method: MARIAM SADAT POS.m  
 ERM Calibration Status: OK  
 Comment:

Sample Name: P33 4 MEO 5 CI POS  
 Fraction: P3-A2  
 User Name:  
 Acquired Time: 28-Sep-17 11:03:34 AM  
 DA Method: default

Sample Group: Info.  
 Acquisition SW: 6300 series TOF/MSD series  
 Version: Q-TOF 8.05.01 (83125.3)

| Compound Label              | Name            | m/z    | RT    | Algorithm                 | Mass   |
|-----------------------------|-----------------|--------|-------|---------------------------|--------|
| Cpd 274:<br>Cer(d18:0/18:0) | Cer(d18:0/18:0) | 590.24 | 5.753 | Find by Molecular Feature | 590.24 |

Compound Chromatograms

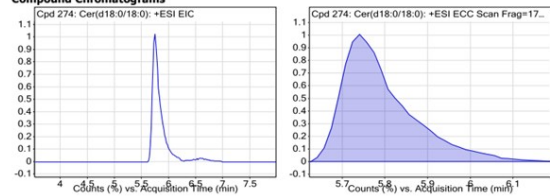

IFE MS Spectrum

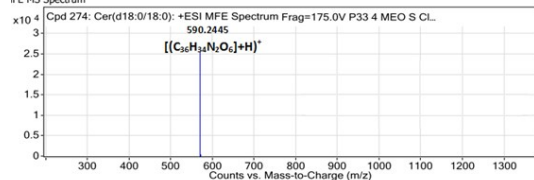

MS Spectrum Peak List

| m/z    | Calc m/z | Diff(ppm) | z | Abund    | Formula                                                       | Ion                |
|--------|----------|-----------|---|----------|---------------------------------------------------------------|--------------------|
| 590.24 |          |           | 1 | 31679.46 | C <sub>36</sub> H <sub>34</sub> N <sub>2</sub> O <sub>6</sub> | (M+H) <sup>+</sup> |
| 591.25 |          |           | 1 | 6497.74  | C <sub>36</sub> H <sub>34</sub> N <sub>2</sub> O <sub>6</sub> | (M+H) <sup>+</sup> |
| 592.25 |          |           | 1 | 679.08   | C <sub>36</sub> H <sub>34</sub> N <sub>2</sub> O <sub>6</sub> | (M+H) <sup>+</sup> |

MS Spectrum

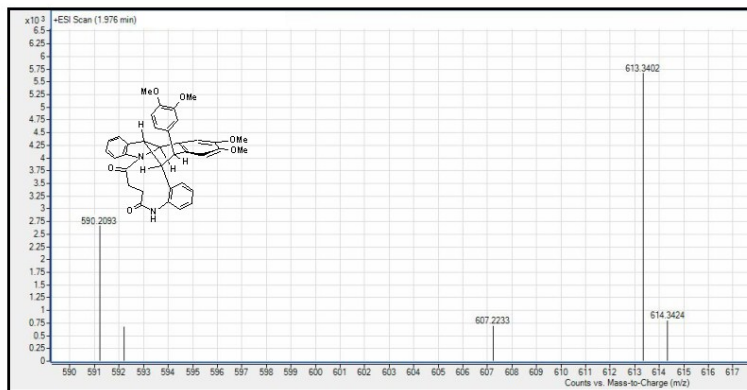

1

2

3

4

5

Figure S83: Mass spectral data for compound (73) Scheme 17.
